# Supplementary material for: Longitudinal proteomic profiling of dialysis patients with COVID-19 reveals markers of severity and predictors of death
Source: eLife journal article supplement (doi:10.7554/elife.64827), 2021-03-11
Supplement: supp [file elife-64827-supp-v1.zip]

Archive with 17 entries (17 files):
- elife_poa_e64827_Figure_1_figure_supplement_1.pdf
- elife_poa_e64827_Figure_2_figure_supplement_1.pdf
- elife_poa_e64827_Figure_2_figure_supplement_2.pdf
- elife_poa_e64827_Figure_3_figure_supplement_1.pdf
- elife_poa_e64827_Figure_3_figure_supplement_2.pdf
- elife_poa_e64827_Figure_3_figure_supplement_3.pdf
- elife_poa_e64827_Figure_3_figure_supplement_4.pdf
- elife_poa_e64827_Figure_4_figure_supplement_1.pdf
- elife_poa_e64827_Figure_7_figure_supplement_1.pdf
- elife_poa_e64827_Figure_9_figure_supplement_1.pdf
- elife_poa_e64827_Figure_9_figure_supplement_2.pdf
- elife_poa_e64827_Supplementary_file_1.xlsx
- elife_poa_e64827_Source_data_1.csv
- elife_poa_e64827_Source_data_2.csv
- elife_poa_e64827_Source_data_3.csv
- elife_poa_e64827_Source_data_4.csv
- elife_poa_e64827_Transparent_Reporting_File.docx
