# Supplementary material for: Longitudinal proteomic profiling of dialysis patients with COVID-19 reveals markers of severity and predictors of death
Source: eLife journal article supplement (doi:10.7554/elife.64827), 2021-03-11

# Figure 3 figure supplement 2

**a**

COVID-19 +ve vs -ve  
differential abundance analysis

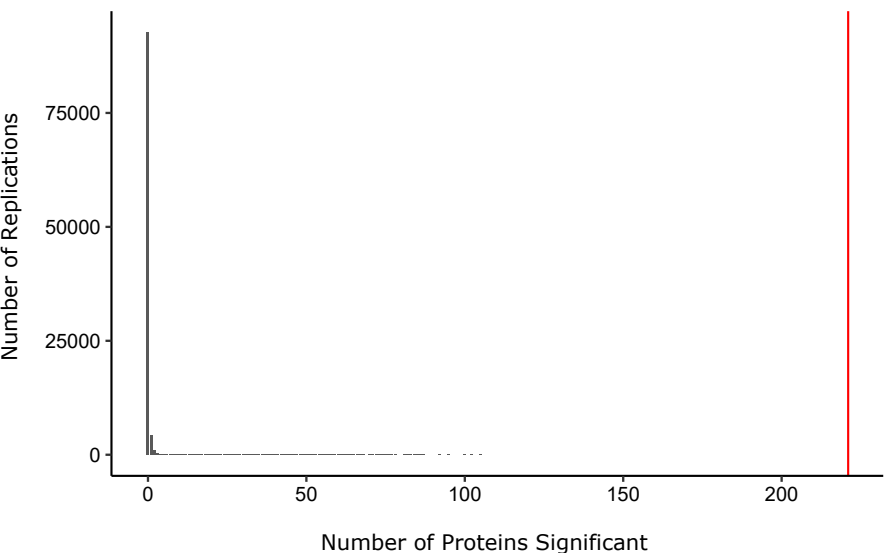

**b**

COVID-19 severity  
differential abundance analysis

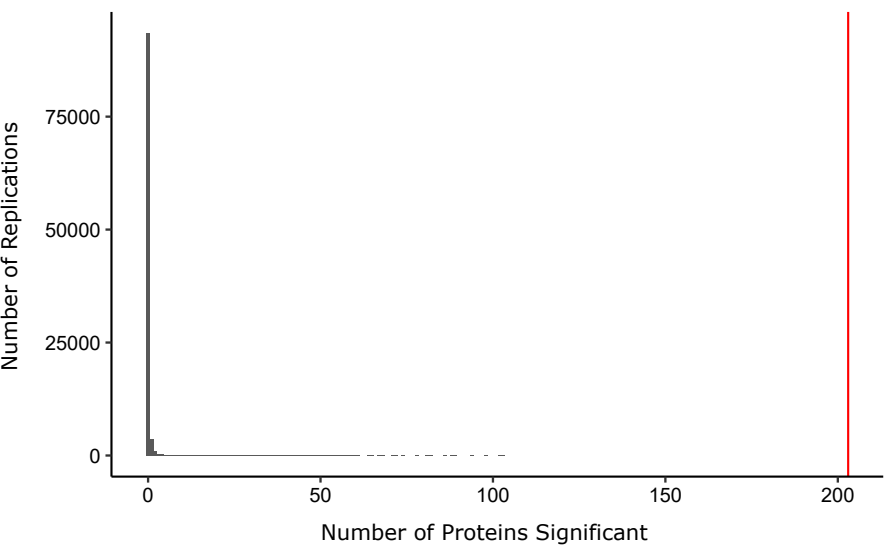

Supplement: supp [file elife-64827-supp-v1.zip › elife_poa_e64827_Figure_3_figure_supplement_2.pdf]
