# Supplementary material for: Longitudinal proteomic profiling of dialysis patients with COVID-19 reveals markers of severity and predictors of death
Source: eLife journal article supplement (doi:10.7554/elife.64827), 2021-03-11

Figure 3 figure supplement 4

COVID-19 +ve vs -ve differential abundance analysis

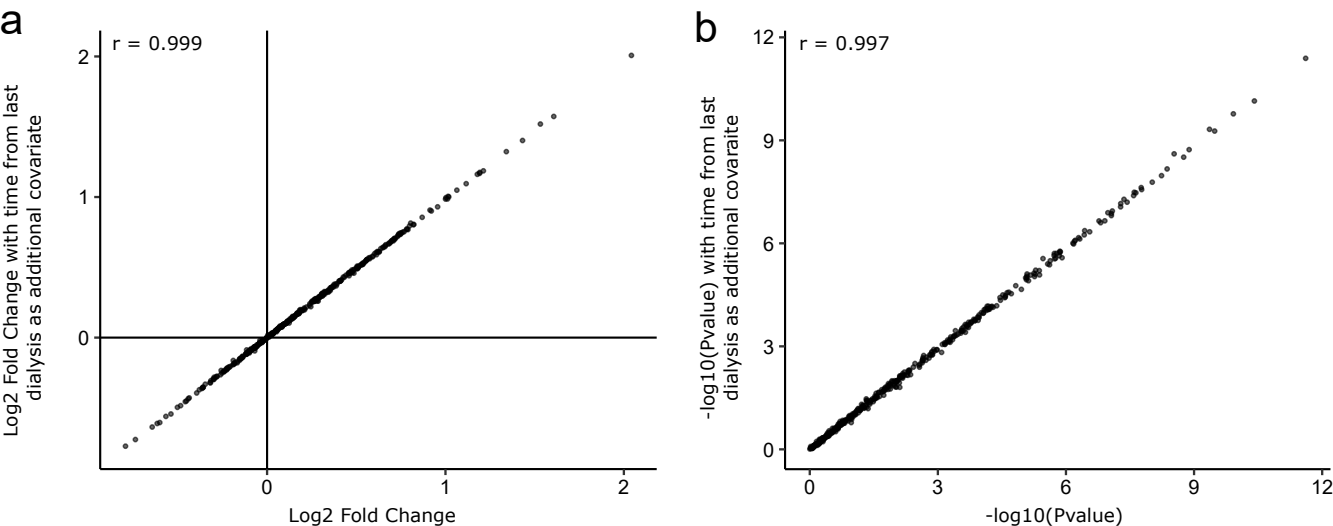

COVID-19 Severity differential abundance analysis

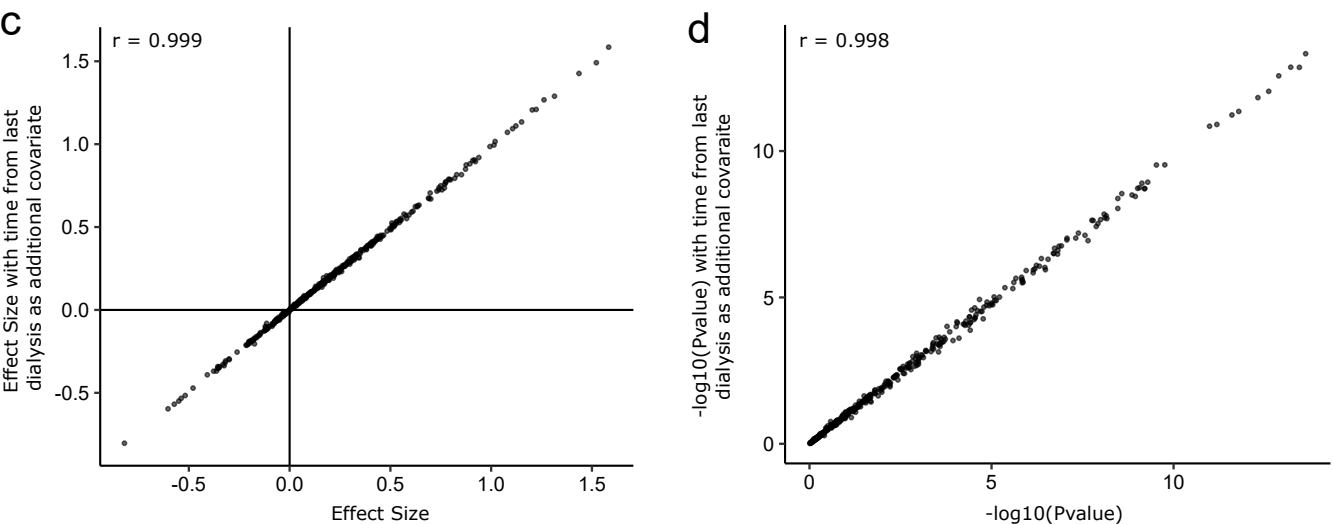

Supplement: supp [file elife-64827-supp-v1.zip › elife_poa_e64827_Figure_3_figure_supplement_4.pdf]
