# Supplementary material for: Longitudinal proteomic profiling of dialysis patients with COVID-19 reveals markers of severity and predictors of death
Source: eLife journal article supplement (doi:10.7554/elife.64827), 2021-03-11
Supplement: supp [file elife-64827-supp-v1.zip › elife_poa_e64827_Source_data_1.csv]

SampleID	Individual_ID	UniProt	GeneID	Assay	NPX	Panel	Index
C60_1	C60	P42785	PRCP	PRCP	1.6118	CM	1
C31_2	C31	P42785	PRCP	PRCP	1.4277	CM	2
C60_3	C60	P42785	PRCP	PRCP	1.01689	CM	3
C10_6	C10	P42785	PRCP	PRCP	1.37725	CM	6
C114_7	C114	P42785	PRCP	PRCP	1.97878	CM	7
C60_8	C60	P42785	PRCP	PRCP	1.37635	CM	8
C123_9	C123	P42785	PRCP	PRCP	1.44531	CM	9
C201_10	C201	P42785	PRCP	PRCP	0.60394	CM	10
C65_11	C65	P42785	PRCP	PRCP	2.68578	CM	11
C114_14	C114	P42785	PRCP	PRCP	1.44074	CM	14
C60_15	C60	P42785	PRCP	PRCP	1.30002	CM	15
C65_16	C65	P42785	PRCP	PRCP	1.46734	CM	16
C10_18	C10	P42785	PRCP	PRCP	1.50078	CM	18
C257_19	C257	P42785	PRCP	PRCP	1.47709	CM	19
C31_20	C31	P42785	PRCP	PRCP	1.06261	CM	20
C33_21	C33	P42785	PRCP	PRCP	1.186	CM	21
C60_22	C60	P42785	PRCP	PRCP	1.82411	CM	22
C60_23	C60	P42785	PRCP	PRCP	1.12788	CM	23
C40_26	C40	P42785	PRCP	PRCP	1.70747	CM	26
C65_28	C65	P42785	PRCP	PRCP	0.89394	CM	28
C65_29	C65	P42785	PRCP	PRCP	0.95066	CM	29
C60_30	C60	P42785	PRCP	PRCP	1.69187	CM	30
C123_31	C123	P42785	PRCP	PRCP	0.84535	CM	31
C65_33	C65	P42785	PRCP	PRCP	1.21753	CM	33
C238_34	C238	P42785	PRCP	PRCP	1.80631	CM	34
C162_35	C162	P42785	PRCP	PRCP	1.6446	CM	35
C123_36	C123	P42785	PRCP	PRCP	1.02009	CM	36
C114_37	C114	P42785	PRCP	PRCP	1.69201	CM	37
C65_38	C65	P42785	PRCP	PRCP	1.7085	CM	38
C40_39	C40	P42785	PRCP	PRCP	1.50701	CM	39
C10_40	C10	P42785	PRCP	PRCP	0.77748	CM	40
C10_42	C10	P42785	PRCP	PRCP	1.5536	CM	42
C40_43	C40	P42785	PRCP	PRCP	1.61064	CM	43
C65_44	C65	P42785	PRCP	PRCP	1.25013	CM	44
C10_47	C10	P42785	PRCP	PRCP	1.52965	CM	47
C114_49	C114	P42785	PRCP	PRCP	1.88587	CM	49
C10_50	C10	P42785	PRCP	PRCP	1.78618	CM	50
C60_52	C60	P42785	PRCP	PRCP	1.85578	CM	52
C114_56	C114	P42785	PRCP	PRCP	0.87605	CM	56
C123_57	C123	P42785	PRCP	PRCP	1.23664	CM	57
C123_58	C123	P42785	PRCP	PRCP	0.60411	CM	58
C60_59	C60	P42785	PRCP	PRCP	1.22916	CM	59
C114_60	C114	P42785	PRCP	PRCP	1.68195	CM	60
C60_61	C60	P42785	PRCP	PRCP	1.74377	CM	61
C114_62	C114	P42785	PRCP	PRCP	1.86932	CM	62
C139_63	C139	P42785	PRCP	PRCP	1.24984	CM	63
C31_65	C31	P42785	PRCP	PRCP	1.1448	CM	65
C40_66	C40	P42785	PRCP	PRCP	1.90117	CM	66
C58_67	C58	P42785	PRCP	PRCP	1.54844	CM	67
C40_69	C40	P42785	PRCP	PRCP	1.27533	CM	69
C104_71	C104	P42785	PRCP	PRCP	1.36728	CM	71
C187_72	C187	P42785	PRCP	PRCP	1.75665	CM	72
C31_73	C31	P42785	PRCP	PRCP	1.37983	CM	73
C65_74	C65	P42785	PRCP	PRCP	1.09286	CM	74
C65_75	C65	P42785	PRCP	PRCP	1.36466	CM	75
C31_78	C31	P42785	PRCP	PRCP	1.08902	CM	78
C31_79	C31	P42785	PRCP	PRCP	1.29576	CM	79
C40_80	C40	P42785	PRCP	PRCP	1.85485	CM	80
C141_81	C141	P42785	PRCP	PRCP	1.61638	CM	81
C123_82	C123	P42785	PRCP	PRCP	1.02597	CM	82
C123_84	C123	P42785	PRCP	PRCP	1.61277	CM	84
C31_85	C31	P42785	PRCP	PRCP	0.92484	CM	85
C40_86	C40	P42785	PRCP	PRCP	1.53806	CM	86
C40_87	C40	P42785	PRCP	PRCP	2.03899	CM	87
C116_88	C116	P42785	PRCP	PRCP	1.24295	CM	88
C34_89	C34	P42785	PRCP	PRCP	1.19274	CM	89
C113_90	C113	P42785	PRCP	PRCP	1.41384	CM	90
C21_91	C21	P42785	PRCP	PRCP	1.23404	CM	91
C47_93	C47	P42785	PRCP	PRCP	1.51833	CM	93
C132_94	C132	P42785	PRCP	PRCP	1.46059	CM	94
C113_95	C113	P42785	PRCP	PRCP	1.76062	CM	95
C23_96	C23	P42785	PRCP	PRCP	1.46626	CM	96
C237_97	C237	P42785	PRCP	PRCP	1.51574	CM	97
C126_98	C126	P42785	PRCP	PRCP	1.2838	CM	98
C47_99	C47	P42785	PRCP	PRCP	1.23114	CM	99
C47_100	C47	P42785	PRCP	PRCP	1.26383	CM	100
C127_101	C127	P42785	PRCP	PRCP	1.46584	CM	101
C113_102	C113	P42785	PRCP	PRCP	1.06787	CM	102
C126_103	C126	P42785	PRCP	PRCP	1.4624	CM	103
C110_105	C110	P42785	PRCP	PRCP	1.38547	CM	105
C167_106	C167	P42785	PRCP	PRCP	1.58409	CM	106
C34_107	C34	P42785	PRCP	PRCP	1.25707	CM	107
C69_108	C69	P42785	PRCP	PRCP	1.13594	CM	108
C116_109	C116	P42785	PRCP	PRCP	1.19202	CM	109
C113_110	C113	P42785	PRCP	PRCP	1.37245	CM	110
C42_111	C42	P42785	PRCP	PRCP	1.54862	CM	111
C42_112	C42	P42785	PRCP	PRCP	1.38724	CM	112
C132_113	C132	P42785	PRCP	PRCP	1.32319	CM	113
C116_115	C116	P42785	PRCP	PRCP	1.14635	CM	115
C126_116	C126	P42785	PRCP	PRCP	1.36312	CM	116
C116_117	C116	P42785	PRCP	PRCP	1.13591	CM	117
C23_118	C23	P42785	PRCP	PRCP	1.34665	CM	118
C21_119	C21	P42785	PRCP	PRCP	1.13753	CM	119
C126_120	C126	P42785	PRCP	PRCP	1.22316	CM	120
C248_121	C248	P42785	PRCP	PRCP	1.52822	CM	121
C153_122	C153	P42785	PRCP	PRCP	1.52287	CM	122
C34_123	C34	P42785	PRCP	PRCP	1.12955	CM	123
C132_124	C132	P42785	PRCP	PRCP	1.27341	CM	124
C126_125	C126	P42785	PRCP	PRCP	1.39415	CM	125
C47_127	C47	P42785	PRCP	PRCP	1.39016	CM	127
C21_128	C21	P42785	PRCP	PRCP	1.34705	CM	128
C110_129	C110	P42785	PRCP	PRCP	1.40449	CM	129
C127_131	C127	P42785	PRCP	PRCP	1.40718	CM	131
C21_133	C21	P42785	PRCP	PRCP	1.36451	CM	133
C47_134	C47	P42785	PRCP	PRCP	1.36627	CM	134
C127_136	C127	P42785	PRCP	PRCP	1.46431	CM	136
C110_137	C110	P42785	PRCP	PRCP	1.47248	CM	137
C21_138	C21	P42785	PRCP	PRCP	1.35368	CM	138
C113_139	C113	P42785	PRCP	PRCP	1.20567	CM	139
C42_142	C42	P42785	PRCP	PRCP	1.26384	CM	142
C127_143	C127	P42785	PRCP	PRCP	1.44343	CM	143
C23_144	C23	P42785	PRCP	PRCP	1.36355	CM	144
C23_145	C23	P42785	PRCP	PRCP	2.83529	CM	145
C113_146	C113	P42785	PRCP	PRCP	1.36636	CM	146
C132_147	C132	P42785	PRCP	PRCP	1.49725	CM	147
C116_148	C116	P42785	PRCP	PRCP	1.19895	CM	148
C127_149	C127	P42785	PRCP	PRCP	1.47131	CM	149
C163_150	C163	P42785	PRCP	PRCP	1.37411	CM	150
C110_151	C110	P42785	PRCP	PRCP	1.45181	CM	151
C42_152	C42	P42785	PRCP	PRCP	1.40152	CM	152
C152_154	C152	P42785	PRCP	PRCP	1.64251	CM	154
C47_155	C47	P42785	PRCP	PRCP	1.16794	CM	155
C132_156	C132	P42785	PRCP	PRCP	1.34189	CM	156
C127_157	C127	P42785	PRCP	PRCP	1.38533	CM	157
C108_159	C108	P42785	PRCP	PRCP	1.21689	CM	159
C196_160	C196	P42785	PRCP	PRCP	1.46772	CM	160
C34_161	C34	P42785	PRCP	PRCP	1.33901	CM	161
C116_162	C116	P42785	PRCP	PRCP	1.52526	CM	162
C126_163	C126	P42785	PRCP	PRCP	1.55528	CM	163
C21_164	C21	P42785	PRCP	PRCP	5.01626	CM	164
C42_166	C42	P42785	PRCP	PRCP	1.48849	CM	166
C34_167	C34	P42785	PRCP	PRCP	1.51304	CM	167
C103_169	C103	P42785	PRCP	PRCP	1.76479	CM	169
C23_170	C23	P42785	PRCP	PRCP	1.63939	CM	170
C42_171	C42	P42785	PRCP	PRCP	1.55124	CM	171
C23_172	C23	P42785	PRCP	PRCP	1.53194	CM	172
C34_173	C34	P42785	PRCP	PRCP	1.3031	CM	173
C132_174	C132	P42785	PRCP	PRCP	1.25433	CM	174
C80_176	C80	P42785	PRCP	PRCP	1.8648	CM	176
C24_177	C24	P42785	PRCP	PRCP	1.37726	CM	177
C7_178	C7	P42785	PRCP	PRCP	0.95537	CM	178
C20_179	C20	P42785	PRCP	PRCP	1.17572	CM	179
C63_181	C63	P42785	PRCP	PRCP	1.55941	CM	181
C12_182	C12	P42785	PRCP	PRCP	1.59233	CM	182
C7_183	C7	P42785	PRCP	PRCP	0.90875	CM	183
C22_184	C22	P42785	PRCP	PRCP	2.03617	CM	184
C166_185	C166	P42785	PRCP	PRCP	1.53488	CM	185
C9_186	C9	P42785	PRCP	PRCP	1.38642	CM	186
C50_187	C50	P42785	PRCP	PRCP	1.09573	CM	187
C32_188	C32	P42785	PRCP	PRCP	1.44481	CM	188
C11_189	C11	P42785	PRCP	PRCP	1.62783	CM	189
C7_190	C7	P42785	PRCP	PRCP	0.92875	CM	190
C9_191	C9	P42785	PRCP	PRCP	1.49234	CM	191
C63_193	C63	P42785	PRCP	PRCP	2.01053	CM	193
C169_194	C169	P42785	PRCP	PRCP	1.3824	CM	194
C24_195	C24	P42785	PRCP	PRCP	1.35595	CM	195
C29_196	C29	P42785	PRCP	PRCP	1.14179	CM	196
C80_197	C80	P42785	PRCP	PRCP	1.81247	CM	197
C7_198	C7	P42785	PRCP	PRCP	1.53087	CM	198
C50_199	C50	P42785	PRCP	PRCP	0.69885	CM	199
C27_200	C27	P42785	PRCP	PRCP	1.62031	CM	200
C128_201	C128	P42785	PRCP	PRCP	1.66836	CM	201
C80_203	C80	P42785	PRCP	PRCP	2.02077	CM	203
C9_204	C9	P42785	PRCP	PRCP	1.40461	CM	204
C80_205	C80	P42785	PRCP	PRCP	1.57398	CM	205
C22_206	C22	P42785	PRCP	PRCP	1.68715	CM	206
C20_207	C20	P42785	PRCP	PRCP	1.11514	CM	207
C9_208	C9	P42785	PRCP	PRCP	1.39678	CM	208
C89_209	C89	P42785	PRCP	PRCP	1.6361	CM	209
C212_210	C212	P42785	PRCP	PRCP	1.41204	CM	210
C24_211	C24	P42785	PRCP	PRCP	0.92004	CM	211
C12_212	C12	P42785	PRCP	PRCP	1.80667	CM	212
C9_213	C9	P42785	PRCP	PRCP	1.66921	CM	213
C63_215	C63	P42785	PRCP	PRCP	1.97779	CM	215
C63_217	C63	P42785	PRCP	PRCP	1.76948	CM	217
C128_218	C128	P42785	PRCP	PRCP	1.24927	CM	218
C11_219	C11	P42785	PRCP	PRCP	1.09255	CM	219
C63_222	C63	P42785	PRCP	PRCP	1.9182	CM	222
C12_224	C12	P42785	PRCP	PRCP	1.07603	CM	224
C37_225	C37	P42785	PRCP	PRCP	1.16542	CM	225
C20_226	C20	P42785	PRCP	PRCP	1.25047	CM	226
C7_227	C7	P42785	PRCP	PRCP	0.84929	CM	227
C50_230	C50	P42785	PRCP	PRCP	0.47358	CM	230
C11_231	C11	P42785	PRCP	PRCP	1.65108	CM	231
C22_232	C22	P42785	PRCP	PRCP	1.31304	CM	232
C22_233	C22	P42785	PRCP	PRCP	1.8205	CM	233
C7_234	C7	P42785	PRCP	PRCP	0.84904	CM	234
C12_235	C12	P42785	PRCP	PRCP	1.71763	CM	235
C80_236	C80	P42785	PRCP	PRCP	1.62526	CM	236
C11_237	C11	P42785	PRCP	PRCP	1.71785	CM	237
C142_238	C142	P42785	PRCP	PRCP	0.84001	CM	238
C37_239	C37	P42785	PRCP	PRCP	1.5972	CM	239
C27_240	C27	P42785	PRCP	PRCP	0.61631	CM	240
C128_241	C128	P42785	PRCP	PRCP	1.37086	CM	241
C193_242	C193	P42785	PRCP	PRCP	1.07853	CM	242
C50_243	C50	P42785	PRCP	PRCP	1.14441	CM	243
C128_244	C128	P42785	PRCP	PRCP	1.24844	CM	244
C11_245	C11	P42785	PRCP	PRCP	2.15543	CM	245
C134_247	C134	P42785	PRCP	PRCP	1.36434	CM	247
C240_248	C240	P42785	PRCP	PRCP	1.98024	CM	248
C27_249	C27	P42785	PRCP	PRCP	0.99156	CM	249
C80_250	C80	P42785	PRCP	PRCP	2.19599	CM	250
C9_251	C9	P42785	PRCP	PRCP	1.05535	CM	251
C20_252	C20	P42785	PRCP	PRCP	0.98499	CM	252
C27_254	C27	P42785	PRCP	PRCP	1.31883	CM	254
C32_255	C32	P42785	PRCP	PRCP	1.46577	CM	255
C128_256	C128	P42785	PRCP	PRCP	1.53387	CM	256
C234_257	C234	P42785	PRCP	PRCP	1.48544	CM	257
C20_258	C20	P42785	PRCP	PRCP	1.14691	CM	258
C27_259	C27	P42785	PRCP	PRCP	1.36741	CM	259
C22_260	C22	P42785	PRCP	PRCP	2.55402	CM	260
C24_261	C24	P42785	PRCP	PRCP	1.19558	CM	261
C12_262	C12	P42785	PRCP	PRCP	1.67889	CM	262
C87_264	C87	P42785	PRCP	PRCP	1.87648	CM	264
C59_267	C59	P42785	PRCP	PRCP	0.8058	CM	267
C25_268	C25	P42785	PRCP	PRCP	0.96408	CM	268
C48_269	C48	P42785	PRCP	PRCP	1.57247	CM	269
C129_270	C129	P42785	PRCP	PRCP	1.03498	CM	270
C87_271	C87	P42785	PRCP	PRCP	1.41522	CM	271
C73_272	C73	P42785	PRCP	PRCP	1.42375	CM	272
C242_273	C242	P42785	PRCP	PRCP	1.3943	CM	273
C93_274	C93	P42785	PRCP	PRCP	1.34474	CM	274
C82_275	C82	P42785	PRCP	PRCP	0.9014	CM	275
C82_276	C82	P42785	PRCP	PRCP	0.97332	CM	276
C125_277	C125	P42785	PRCP	PRCP	2.07252	CM	277
C68_278	C68	P42785	PRCP	PRCP	1.00472	CM	278
C124_279	C124	P42785	PRCP	PRCP	2.19701	CM	279
C105_280	C105	P42785	PRCP	PRCP	1.24564	CM	280
C66_281	C66	P42785	PRCP	PRCP	1.38857	CM	281
C214_282	C214	P42785	PRCP	PRCP	1.85166	CM	282
C99_283	C99	P42785	PRCP	PRCP	2.73612	CM	283
C251_284	C251	P42785	PRCP	PRCP	1.5967	CM	284
C87_285	C87	P42785	PRCP	PRCP	2.00114	CM	285
C68_286	C68	P42785	PRCP	PRCP	0.89074	CM	286
C36_287	C36	P42785	PRCP	PRCP	0.9057	CM	287
C36_288	C36	P42785	PRCP	PRCP	1.26966	CM	288
C105_290	C105	P42785	PRCP	PRCP	1.13603	CM	290
C93_291	C93	P42785	PRCP	PRCP	1.5067	CM	291
C124_292	C124	P42785	PRCP	PRCP	2.7176	CM	292
C87_293	C87	P42785	PRCP	PRCP	2.22821	CM	293
C73_294	C73	P42785	PRCP	PRCP	1.9816	CM	294
C59_295	C59	P42785	PRCP	PRCP	1.04167	CM	295
C124_296	C124	P42785	PRCP	PRCP	2.25691	CM	296
C64_297	C64	P42785	PRCP	PRCP	1.55436	CM	297
C137_298	C137	P42785	PRCP	PRCP	1.3566	CM	298
C99_299	C99	P42785	PRCP	PRCP	1.81488	CM	299
C129_300	C129	P42785	PRCP	PRCP	1.79367	CM	300
C93_301	C93	P42785	PRCP	PRCP	1.55295	CM	301
C18_302	C18	P42785	PRCP	PRCP	0.95567	CM	302
C48_303	C48	P42785	PRCP	PRCP	1.28742	CM	303
C25_304	C25	P42785	PRCP	PRCP	1.23928	CM	304
C49_305	C49	P42785	PRCP	PRCP	0.957	CM	305
C124_307	C124	P42785	PRCP	PRCP	2.34744	CM	307
C25_309	C25	P42785	PRCP	PRCP	1.24496	CM	309
C49_310	C49	P42785	PRCP	PRCP	1.01105	CM	310
C129_312	C129	P42785	PRCP	PRCP	1.54452	CM	312
C66_313	C66	P42785	PRCP	PRCP	1.51827	CM	313
C59_314	C59	P42785	PRCP	PRCP	1.14476	CM	314
C68_315	C68	P42785	PRCP	PRCP	0.99341	CM	315
C105_316	C105	P42785	PRCP	PRCP	1.08661	CM	316
C105_317	C105	P42785	PRCP	PRCP	1.04016	CM	317
C36_318	C36	P42785	PRCP	PRCP	1.37109	CM	318
C125_319	C125	P42785	PRCP	PRCP	2.36941	CM	319
C73_320	C73	P42785	PRCP	PRCP	1.44898	CM	320
C99_321	C99	P42785	PRCP	PRCP	1.44081	CM	321
C68_322	C68	P42785	PRCP	PRCP	0.90658	CM	322
C129_323	C129	P42785	PRCP	PRCP	1.42305	CM	323
C87_324	C87	P42785	PRCP	PRCP	2.02098	CM	324
C125_325	C125	P42785	PRCP	PRCP	2.12583	CM	325
C195_326	C195	P42785	PRCP	PRCP	1.42698	CM	326
C105_327	C105	P42785	PRCP	PRCP	0.99314	CM	327
C17_328	C17	P42785	PRCP	PRCP	1.52416	CM	328
C18_329	C18	P42785	PRCP	PRCP	0.76644	CM	329
C164_330	C164	P42785	PRCP	PRCP	1.044	CM	330
C82_331	C82	P42785	PRCP	PRCP	1.04554	CM	331
C125_333	C125	P42785	PRCP	PRCP	2.20104	CM	333
C105_334	C105	P42785	PRCP	PRCP	1.1981	CM	334
C130_335	C130	P42785	PRCP	PRCP	1.00798	CM	335
C180_336	C180	P42785	PRCP	PRCP	1.54184	CM	336
C149_337	C149	P42785	PRCP	PRCP	1.71542	CM	337
C93_338	C93	P42785	PRCP	PRCP	3.37502	CM	338
C93_339	C93	P42785	PRCP	PRCP	1.55066	CM	339
C25_340	C25	P42785	PRCP	PRCP	1.52802	CM	340
C17_342	C17	P42785	PRCP	PRCP	1.52555	CM	342
C105_343	C105	P42785	PRCP	PRCP	1.03356	CM	343
C18_344	C18	P42785	PRCP	PRCP	0.81932	CM	344
C189_345	C189	P42785	PRCP	PRCP	1.28113	CM	345
C59_346	C59	P42785	PRCP	PRCP	1.7409	CM	346
C17_347	C17	P42785	PRCP	PRCP	1.84481	CM	347
C73_348	C73	P42785	PRCP	PRCP	1.84397	CM	348
C99_349	C99	P42785	PRCP	PRCP	2.1726	CM	349
C18_351	C18	P42785	PRCP	PRCP	1.35665	CM	351
C246_352	C246	P42785	PRCP	PRCP	2.02415	CM	352
C84_353	C84	P42785	PRCP	PRCP	1.36912	CM	353
C241_354	C241	P42785	PRCP	PRCP	0.84337	CM	354
C67_355	C67	P42785	PRCP	PRCP	1.02578	CM	355
C106_360	C106	P42785	PRCP	PRCP	1.39053	CM	360
C224_361	C224	P42785	PRCP	PRCP	2.05486	CM	361
C77_363	C77	P42785	PRCP	PRCP	1.40834	CM	363
C161_364	C161	P42785	PRCP	PRCP	1.88806	CM	364
C85_365	C85	P42785	PRCP	PRCP	1.10651	CM	365
C197_366	C197	P42785	PRCP	PRCP	1.03004	CM	366
C173_367	C173	P42785	PRCP	PRCP	1.21337	CM	367
C245_368	C245	P42785	PRCP	PRCP	1.59152	CM	368
C57_371	C57	P42785	PRCP	PRCP	1.36002	CM	371
C70_372	C70	P42785	PRCP	PRCP	2.01087	CM	372
C77_374	C77	P42785	PRCP	PRCP	1.50354	CM	374
C60_1	C60	P00915	CA1	CA1	7.68069	CM	1
C31_2	C31	P00915	CA1	CA1	5.23585	CM	2
C60_3	C60	P00915	CA1	CA1	6.44517	CM	3
C10_6	C10	P00915	CA1	CA1	5.29325	CM	6
C114_7	C114	P00915	CA1	CA1	5.64989	CM	7
C60_8	C60	P00915	CA1	CA1	7.0641	CM	8
C123_9	C123	P00915	CA1	CA1	5.4534	CM	9
C201_10	C201	P00915	CA1	CA1	6.13195	CM	10
C65_11	C65	P00915	CA1	CA1	7.76785	CM	11
C114_14	C114	P00915	CA1	CA1	5.59477	CM	14
C60_15	C60	P00915	CA1	CA1	5.99846	CM	15
C65_16	C65	P00915	CA1	CA1	5.79999	CM	16
C10_18	C10	P00915	CA1	CA1	4.71377	CM	18
C257_19	C257	P00915	CA1	CA1	6.39261	CM	19
C31_20	C31	P00915	CA1	CA1	5.0607	CM	20
C33_21	C33	P00915	CA1	CA1	4.92741	CM	21
C60_22	C60	P00915	CA1	CA1	6.69589	CM	22
C60_23	C60	P00915	CA1	CA1	6.79734	CM	23
C40_26	C40	P00915	CA1	CA1	6.36142	CM	26
C65_28	C65	P00915	CA1	CA1	6.29888	CM	28
C65_29	C65	P00915	CA1	CA1	7.47267	CM	29
C60_30	C60	P00915	CA1	CA1	6.24532	CM	30
C123_31	C123	P00915	CA1	CA1	6.07191	CM	31
C65_33	C65	P00915	CA1	CA1	5.23377	CM	33
C238_34	C238	P00915	CA1	CA1	6.90705	CM	34
C162_35	C162	P00915	CA1	CA1	5.70899	CM	35
C123_36	C123	P00915	CA1	CA1	6.18731	CM	36
C114_37	C114	P00915	CA1	CA1	5.25571	CM	37
C65_38	C65	P00915	CA1	CA1	6.6358	CM	38
C40_39	C40	P00915	CA1	CA1	5.00555	CM	39
C10_40	C10	P00915	CA1	CA1	5.91376	CM	40
C10_42	C10	P00915	CA1	CA1	5.61841	CM	42
C40_43	C40	P00915	CA1	CA1	6.56509	CM	43
C65_44	C65	P00915	CA1	CA1	6.40984	CM	44
C10_47	C10	P00915	CA1	CA1	5.52346	CM	47
C114_49	C114	P00915	CA1	CA1	5.21316	CM	49
C10_50	C10	P00915	CA1	CA1	4.81071	CM	50
C60_52	C60	P00915	CA1	CA1	6.3303	CM	52
C114_56	C114	P00915	CA1	CA1	5.36162	CM	56
C123_57	C123	P00915	CA1	CA1	6.80717	CM	57
C123_58	C123	P00915	CA1	CA1	5.78801	CM	58
C60_59	C60	P00915	CA1	CA1	6.41297	CM	59
C114_60	C114	P00915	CA1	CA1	5.64967	CM	60
C60_61	C60	P00915	CA1	CA1	6.63521	CM	61
C114_62	C114	P00915	CA1	CA1	5.15581	CM	62
C139_63	C139	P00915	CA1	CA1	6.55117	CM	63
C31_65	C31	P00915	CA1	CA1	5.34361	CM	65
C40_66	C40	P00915	CA1	CA1	6.49532	CM	66
C58_67	C58	P00915	CA1	CA1	6.88574	CM	67
C40_69	C40	P00915	CA1	CA1	6.57731	CM	69
C104_71	C104	P00915	CA1	CA1	5.84016	CM	71
C187_72	C187	P00915	CA1	CA1	6.28559	CM	72
C31_73	C31	P00915	CA1	CA1	5.19469	CM	73
C65_74	C65	P00915	CA1	CA1	6.23928	CM	74
C65_75	C65	P00915	CA1	CA1	5.39399	CM	75
C31_78	C31	P00915	CA1	CA1	4.7966	CM	78
C31_79	C31	P00915	CA1	CA1	5.10707	CM	79
C40_80	C40	P00915	CA1	CA1	5.95199	CM	80
C141_81	C141	P00915	CA1	CA1	7.06886	CM	81
C123_82	C123	P00915	CA1	CA1	6.89755	CM	82
C123_84	C123	P00915	CA1	CA1	6.59401	CM	84
C31_85	C31	P00915	CA1	CA1	4.82084	CM	85
C40_86	C40	P00915	CA1	CA1	7.19065	CM	86
C40_87	C40	P00915	CA1	CA1	6.11713	CM	87
C116_88	C116	P00915	CA1	CA1	5.20515	CM	88
C34_89	C34	P00915	CA1	CA1	5.61536	CM	89
C113_90	C113	P00915	CA1	CA1	6.80951	CM	90
C21_91	C21	P00915	CA1	CA1	6.09061	CM	91
C47_93	C47	P00915	CA1	CA1	6.51475	CM	93
C132_94	C132	P00915	CA1	CA1	6.45636	CM	94
C113_95	C113	P00915	CA1	CA1	6.04534	CM	95
C23_96	C23	P00915	CA1	CA1	6.13419	CM	96
C237_97	C237	P00915	CA1	CA1	7.27882	CM	97
C126_98	C126	P00915	CA1	CA1	5.18055	CM	98
C47_99	C47	P00915	CA1	CA1	5.77974	CM	99
C47_100	C47	P00915	CA1	CA1	6.12971	CM	100
C127_101	C127	P00915	CA1	CA1	6.76991	CM	101
C113_102	C113	P00915	CA1	CA1	5.45436	CM	102
C126_103	C126	P00915	CA1	CA1	5.50687	CM	103
C110_105	C110	P00915	CA1	CA1	6.54946	CM	105
C167_106	C167	P00915	CA1	CA1	7.1603	CM	106
C34_107	C34	P00915	CA1	CA1	6.34155	CM	107
C69_108	C69	P00915	CA1	CA1	5.92955	CM	108
C116_109	C116	P00915	CA1	CA1	5.80559	CM	109
C113_110	C113	P00915	CA1	CA1	6.43163	CM	110
C42_111	C42	P00915	CA1	CA1	6.02214	CM	111
C42_112	C42	P00915	CA1	CA1	6.2473	CM	112
C132_113	C132	P00915	CA1	CA1	6.31748	CM	113
C116_115	C116	P00915	CA1	CA1	5.20549	CM	115
C126_116	C126	P00915	CA1	CA1	5.82232	CM	116
C116_117	C116	P00915	CA1	CA1	5.65256	CM	117
C23_118	C23	P00915	CA1	CA1	7.29427	CM	118
C21_119	C21	P00915	CA1	CA1	5.0508	CM	119
C126_120	C126	P00915	CA1	CA1	5.70303	CM	120
C248_121	C248	P00915	CA1	CA1	6.67205	CM	121
C153_122	C153	P00915	CA1	CA1	5.75707	CM	122
C34_123	C34	P00915	CA1	CA1	6.21845	CM	123
C132_124	C132	P00915	CA1	CA1	6.34178	CM	124
C126_125	C126	P00915	CA1	CA1	5.13601	CM	125
C47_127	C47	P00915	CA1	CA1	5.80841	CM	127
C21_128	C21	P00915	CA1	CA1	6.21901	CM	128
C110_129	C110	P00915	CA1	CA1	6.74089	CM	129
C127_131	C127	P00915	CA1	CA1	6.35286	CM	131
C21_133	C21	P00915	CA1	CA1	6.17245	CM	133
C47_134	C47	P00915	CA1	CA1	6.22547	CM	134
C127_136	C127	P00915	CA1	CA1	6.00768	CM	136
C110_137	C110	P00915	CA1	CA1	7.37573	CM	137
C21_138	C21	P00915	CA1	CA1	5.76985	CM	138
C113_139	C113	P00915	CA1	CA1	5.79834	CM	139
C42_142	C42	P00915	CA1	CA1	5.65509	CM	142
C127_143	C127	P00915	CA1	CA1	5.5528	CM	143
C23_144	C23	P00915	CA1	CA1	6.74628	CM	144
C23_145	C23	P00915	CA1	CA1	7.2317	CM	145
C113_146	C113	P00915	CA1	CA1	6.49295	CM	146
C132_147	C132	P00915	CA1	CA1	5.95124	CM	147
C116_148	C116	P00915	CA1	CA1	5.68412	CM	148
C127_149	C127	P00915	CA1	CA1	5.69113	CM	149
C163_150	C163	P00915	CA1	CA1	6.81046	CM	150
C110_151	C110	P00915	CA1	CA1	6.74513	CM	151
C42_152	C42	P00915	CA1	CA1	4.89891	CM	152
C152_154	C152	P00915	CA1	CA1	5.06882	CM	154
C47_155	C47	P00915	CA1	CA1	5.76829	CM	155
C132_156	C132	P00915	CA1	CA1	6.42133	CM	156
C127_157	C127	P00915	CA1	CA1	6.07585	CM	157
C108_159	C108	P00915	CA1	CA1	7.18093	CM	159
C196_160	C196	P00915	CA1	CA1	6.26807	CM	160
C34_161	C34	P00915	CA1	CA1	6.31279	CM	161
C116_162	C116	P00915	CA1	CA1	5.51359	CM	162
C126_163	C126	P00915	CA1	CA1	6.00697	CM	163
C21_164	C21	P00915	CA1	CA1	5.55123	CM	164
C42_166	C42	P00915	CA1	CA1	5.83288	CM	166
C34_167	C34	P00915	CA1	CA1	7.18411	CM	167
C103_169	C103	P00915	CA1	CA1	6.20758	CM	169
C23_170	C23	P00915	CA1	CA1	6.78204	CM	170
C42_171	C42	P00915	CA1	CA1	6.11851	CM	171
C23_172	C23	P00915	CA1	CA1	6.28414	CM	172
C34_173	C34	P00915	CA1	CA1	6.08101	CM	173
C132_174	C132	P00915	CA1	CA1	5.76049	CM	174
C80_176	C80	P00915	CA1	CA1	6.18101	CM	176
C24_177	C24	P00915	CA1	CA1	5.34142	CM	177
C7_178	C7	P00915	CA1	CA1	6.52319	CM	178
C20_179	C20	P00915	CA1	CA1	5.81818	CM	179
C63_181	C63	P00915	CA1	CA1	6.64533	CM	181
C12_182	C12	P00915	CA1	CA1	5.32559	CM	182
C7_183	C7	P00915	CA1	CA1	6.08334	CM	183
C22_184	C22	P00915	CA1	CA1	7.28165	CM	184
C166_185	C166	P00915	CA1	CA1	5.70894	CM	185
C9_186	C9	P00915	CA1	CA1	5.48456	CM	186
C50_187	C50	P00915	CA1	CA1	4.88427	CM	187
C32_188	C32	P00915	CA1	CA1	6.12935	CM	188
C11_189	C11	P00915	CA1	CA1	6.98623	CM	189
C7_190	C7	P00915	CA1	CA1	7.07257	CM	190
C9_191	C9	P00915	CA1	CA1	5.9139	CM	191
C63_193	C63	P00915	CA1	CA1	6.49685	CM	193
C169_194	C169	P00915	CA1	CA1	6.83831	CM	194
C24_195	C24	P00915	CA1	CA1	6.57055	CM	195
C29_196	C29	P00915	CA1	CA1	6.90678	CM	196
C80_197	C80	P00915	CA1	CA1	4.97725	CM	197
C7_198	C7	P00915	CA1	CA1	5.84826	CM	198
C50_199	C50	P00915	CA1	CA1	4.55408	CM	199
C27_200	C27	P00915	CA1	CA1	5.58572	CM	200
C128_201	C128	P00915	CA1	CA1	6.51985	CM	201
C80_203	C80	P00915	CA1	CA1	6.03851	CM	203
C9_204	C9	P00915	CA1	CA1	6.80802	CM	204
C80_205	C80	P00915	CA1	CA1	6.13455	CM	205
C22_206	C22	P00915	CA1	CA1	7.26349	CM	206
C20_207	C20	P00915	CA1	CA1	6.15629	CM	207
C9_208	C9	P00915	CA1	CA1	5.19934	CM	208
C89_209	C89	P00915	CA1	CA1	6.09155	CM	209
C212_210	C212	P00915	CA1	CA1	5.81986	CM	210
C24_211	C24	P00915	CA1	CA1	5.25092	CM	211
C12_212	C12	P00915	CA1	CA1	5.95705	CM	212
C9_213	C9	P00915	CA1	CA1	6.87417	CM	213
C63_215	C63	P00915	CA1	CA1	7.15281	CM	215
C63_217	C63	P00915	CA1	CA1	6.32931	CM	217
C128_218	C128	P00915	CA1	CA1	6.08397	CM	218
C11_219	C11	P00915	CA1	CA1	6.32412	CM	219
C63_222	C63	P00915	CA1	CA1	7.23882	CM	222
C12_224	C12	P00915	CA1	CA1	7.16983	CM	224
C37_225	C37	P00915	CA1	CA1	6.44571	CM	225
C20_226	C20	P00915	CA1	CA1	5.43604	CM	226
C7_227	C7	P00915	CA1	CA1	6.23789	CM	227
C50_230	C50	P00915	CA1	CA1	4.52376	CM	230
C11_231	C11	P00915	CA1	CA1	5.98284	CM	231
C22_232	C22	P00915	CA1	CA1	6.93285	CM	232
C22_233	C22	P00915	CA1	CA1	6.94598	CM	233
C7_234	C7	P00915	CA1	CA1	5.86254	CM	234
C12_235	C12	P00915	CA1	CA1	4.9897	CM	235
C80_236	C80	P00915	CA1	CA1	5.40325	CM	236
C11_237	C11	P00915	CA1	CA1	7.42444	CM	237
C142_238	C142	P00915	CA1	CA1	5.51337	CM	238
C37_239	C37	P00915	CA1	CA1	6.28906	CM	239
C27_240	C27	P00915	CA1	CA1	6.29883	CM	240
C128_241	C128	P00915	CA1	CA1	6.68841	CM	241
C193_242	C193	P00915	CA1	CA1	5.05087	CM	242
C50_243	C50	P00915	CA1	CA1	6.05341	CM	243
C128_244	C128	P00915	CA1	CA1	6.33403	CM	244
C11_245	C11	P00915	CA1	CA1	5.22257	CM	245
C134_247	C134	P00915	CA1	CA1	7.51876	CM	247
C240_248	C240	P00915	CA1	CA1	5.76282	CM	248
C27_249	C27	P00915	CA1	CA1	6.9745	CM	249
C80_250	C80	P00915	CA1	CA1	6.74886	CM	250
C9_251	C9	P00915	CA1	CA1	4.85822	CM	251
C20_252	C20	P00915	CA1	CA1	5.25196	CM	252
C27_254	C27	P00915	CA1	CA1	6.22442	CM	254
C32_255	C32	P00915	CA1	CA1	8.29619	CM	255
C128_256	C128	P00915	CA1	CA1	6.52227	CM	256
C234_257	C234	P00915	CA1	CA1	6.90683	CM	257
C20_258	C20	P00915	CA1	CA1	5.15734	CM	258
C27_259	C27	P00915	CA1	CA1	6.72077	CM	259
C22_260	C22	P00915	CA1	CA1	6.67229	CM	260
C24_261	C24	P00915	CA1	CA1	6.23056	CM	261
C12_262	C12	P00915	CA1	CA1	6.47986	CM	262
C87_264	C87	P00915	CA1	CA1	6.19115	CM	264
C59_267	C59	P00915	CA1	CA1	7.9516	CM	267
C25_268	C25	P00915	CA1	CA1	5.61335	CM	268
C48_269	C48	P00915	CA1	CA1	6.2765	CM	269
C129_270	C129	P00915	CA1	CA1	6.1831	CM	270
C87_271	C87	P00915	CA1	CA1	5.47257	CM	271
C73_272	C73	P00915	CA1	CA1	6.13758	CM	272
C242_273	C242	P00915	CA1	CA1	6.90814	CM	273
C93_274	C93	P00915	CA1	CA1	6.07377	CM	274
C82_275	C82	P00915	CA1	CA1	5.71716	CM	275
C82_276	C82	P00915	CA1	CA1	5.55724	CM	276
C125_277	C125	P00915	CA1	CA1	5.56607	CM	277
C68_278	C68	P00915	CA1	CA1	6.14337	CM	278
C124_279	C124	P00915	CA1	CA1	6.40929	CM	279
C105_280	C105	P00915	CA1	CA1	5.23426	CM	280
C66_281	C66	P00915	CA1	CA1	7.21274	CM	281
C214_282	C214	P00915	CA1	CA1	7.62358	CM	282
C99_283	C99	P00915	CA1	CA1	5.94873	CM	283
C251_284	C251	P00915	CA1	CA1	5.85095	CM	284
C87_285	C87	P00915	CA1	CA1	6.40417	CM	285
C68_286	C68	P00915	CA1	CA1	6.46568	CM	286
C36_287	C36	P00915	CA1	CA1	5.2473	CM	287
C36_288	C36	P00915	CA1	CA1	7.14916	CM	288
C105_290	C105	P00915	CA1	CA1	6.33333	CM	290
C93_291	C93	P00915	CA1	CA1	6.43728	CM	291
C124_292	C124	P00915	CA1	CA1	6.94993	CM	292
C87_293	C87	P00915	CA1	CA1	5.78601	CM	293
C73_294	C73	P00915	CA1	CA1	5.52005	CM	294
C59_295	C59	P00915	CA1	CA1	7.103	CM	295
C124_296	C124	P00915	CA1	CA1	6.19719	CM	296
C64_297	C64	P00915	CA1	CA1	5.74476	CM	297
C137_298	C137	P00915	CA1	CA1	5.84313	CM	298
C99_299	C99	P00915	CA1	CA1	6.20339	CM	299
C129_300	C129	P00915	CA1	CA1	6.32655	CM	300
C93_301	C93	P00915	CA1	CA1	5.95398	CM	301
C18_302	C18	P00915	CA1	CA1	5.83954	CM	302
C48_303	C48	P00915	CA1	CA1	7.45311	CM	303
C25_304	C25	P00915	CA1	CA1	6.23737	CM	304
C49_305	C49	P00915	CA1	CA1	6.9586	CM	305
C124_307	C124	P00915	CA1	CA1	7.00999	CM	307
C25_309	C25	P00915	CA1	CA1	5.72231	CM	309
C49_310	C49	P00915	CA1	CA1	7.51996	CM	310
C129_312	C129	P00915	CA1	CA1	5.87468	CM	312
C66_313	C66	P00915	CA1	CA1	6.26682	CM	313
C59_314	C59	P00915	CA1	CA1	7.63881	CM	314
C68_315	C68	P00915	CA1	CA1	5.95806	CM	315
C105_316	C105	P00915	CA1	CA1	9.02368	CM	316
C105_317	C105	P00915	CA1	CA1	5.99092	CM	317
C36_318	C36	P00915	CA1	CA1	5.5009	CM	318
C125_319	C125	P00915	CA1	CA1	6.51095	CM	319
C73_320	C73	P00915	CA1	CA1	5.87369	CM	320
C99_321	C99	P00915	CA1	CA1	5.40017	CM	321
C68_322	C68	P00915	CA1	CA1	6.56184	CM	322
C129_323	C129	P00915	CA1	CA1	6.23452	CM	323
C87_324	C87	P00915	CA1	CA1	5.79753	CM	324
C125_325	C125	P00915	CA1	CA1	5.53354	CM	325
C195_326	C195	P00915	CA1	CA1	6.43747	CM	326
C105_327	C105	P00915	CA1	CA1	5.744	CM	327
C17_328	C17	P00915	CA1	CA1	6.05067	CM	328
C18_329	C18	P00915	CA1	CA1	5.25307	CM	329
C164_330	C164	P00915	CA1	CA1	5.44549	CM	330
C82_331	C82	P00915	CA1	CA1	5.44751	CM	331
C125_333	C125	P00915	CA1	CA1	6.13502	CM	333
C105_334	C105	P00915	CA1	CA1	5.06621	CM	334
C130_335	C130	P00915	CA1	CA1	7.21258	CM	335
C180_336	C180	P00915	CA1	CA1	6.76277	CM	336
C149_337	C149	P00915	CA1	CA1	6.81828	CM	337
C93_338	C93	P00915	CA1	CA1	5.54556	CM	338
C93_339	C93	P00915	CA1	CA1	6.85048	CM	339
C25_340	C25	P00915	CA1	CA1	5.59066	CM	340
C17_342	C17	P00915	CA1	CA1	5.44288	CM	342
C105_343	C105	P00915	CA1	CA1	4.76366	CM	343
C18_344	C18	P00915	CA1	CA1	6.5851	CM	344
C189_345	C189	P00915	CA1	CA1	6.58573	CM	345
C59_346	C59	P00915	CA1	CA1	7.83329	CM	346
C17_347	C17	P00915	CA1	CA1	6.03745	CM	347
C73_348	C73	P00915	CA1	CA1	5.97654	CM	348
C99_349	C99	P00915	CA1	CA1	5.57423	CM	349
C18_351	C18	P00915	CA1	CA1	5.63124	CM	351
C246_352	C246	P00915	CA1	CA1	6.58446	CM	352
C84_353	C84	P00915	CA1	CA1	5.52104	CM	353
C241_354	C241	P00915	CA1	CA1	5.68019	CM	354
C67_355	C67	P00915	CA1	CA1	6.55677	CM	355
C106_360	C106	P00915	CA1	CA1	5.8688	CM	360
C224_361	C224	P00915	CA1	CA1	5.2802	CM	361
C77_363	C77	P00915	CA1	CA1	5.4357	CM	363
C161_364	C161	P00915	CA1	CA1	6.50929	CM	364
C85_365	C85	P00915	CA1	CA1	6.63441	CM	365
C197_366	C197	P00915	CA1	CA1	7.42338	CM	366
C173_367	C173	P00915	CA1	CA1	8.2352	CM	367
C245_368	C245	P00915	CA1	CA1	6.32483	CM	368
C57_371	C57	P00915	CA1	CA1	6.96216	CM	371
C70_372	C70	P00915	CA1	CA1	5.15729	CM	372
C77_374	C77	P00915	CA1	CA1	5.6804	CM	374
C60_1	C60	P05362	ICAM1	ICAM1	7.18571	CM	1
C31_2	C31	P05362	ICAM1	ICAM1	6.71139	CM	2
C60_3	C60	P05362	ICAM1	ICAM1	6.54063	CM	3
C10_6	C10	P05362	ICAM1	ICAM1	7.10134	CM	6
C114_7	C114	P05362	ICAM1	ICAM1	6.98026	CM	7
C60_8	C60	P05362	ICAM1	ICAM1	7.39522	CM	8
C123_9	C123	P05362	ICAM1	ICAM1	6.92	CM	9
C201_10	C201	P05362	ICAM1	ICAM1	6.41276	CM	10
C65_11	C65	P05362	ICAM1	ICAM1	6.95096	CM	11
C114_14	C114	P05362	ICAM1	ICAM1	7.35955	CM	14
C60_15	C60	P05362	ICAM1	ICAM1	6.73227	CM	15
C65_16	C65	P05362	ICAM1	ICAM1	7.78902	CM	16
C10_18	C10	P05362	ICAM1	ICAM1	7.73284	CM	18
C257_19	C257	P05362	ICAM1	ICAM1	6.17674	CM	19
C31_20	C31	P05362	ICAM1	ICAM1	6.02611	CM	20
C33_21	C33	P05362	ICAM1	ICAM1	6.45408	CM	21
C60_22	C60	P05362	ICAM1	ICAM1	7.03698	CM	22
C60_23	C60	P05362	ICAM1	ICAM1	6.83407	CM	23
C40_26	C40	P05362	ICAM1	ICAM1	6.64086	CM	26
C65_28	C65	P05362	ICAM1	ICAM1	6.4394	CM	28
C65_29	C65	P05362	ICAM1	ICAM1	7.71849	CM	29
C60_30	C60	P05362	ICAM1	ICAM1	7.46099	CM	30
C123_31	C123	P05362	ICAM1	ICAM1	6.78868	CM	31
C65_33	C65	P05362	ICAM1	ICAM1	7.72929	CM	33
C238_34	C238	P05362	ICAM1	ICAM1	6.6797	CM	34
C162_35	C162	P05362	ICAM1	ICAM1	5.95722	CM	35
C123_36	C123	P05362	ICAM1	ICAM1	6.81881	CM	36
C114_37	C114	P05362	ICAM1	ICAM1	6.78731	CM	37
C65_38	C65	P05362	ICAM1	ICAM1	7.50467	CM	38
C40_39	C40	P05362	ICAM1	ICAM1	6.17878	CM	39
C10_40	C10	P05362	ICAM1	ICAM1	5.99033	CM	40
C10_42	C10	P05362	ICAM1	ICAM1	7.40565	CM	42
C40_43	C40	P05362	ICAM1	ICAM1	6.64654	CM	43
C65_44	C65	P05362	ICAM1	ICAM1	7.76402	CM	44
C10_47	C10	P05362	ICAM1	ICAM1	7.28475	CM	47
C114_49	C114	P05362	ICAM1	ICAM1	7.3404	CM	49
C10_50	C10	P05362	ICAM1	ICAM1	7.63948	CM	50
C60_52	C60	P05362	ICAM1	ICAM1	7.12964	CM	52
C114_56	C114	P05362	ICAM1	ICAM1	7.23226	CM	56
C123_57	C123	P05362	ICAM1	ICAM1	6.89343	CM	57
C123_58	C123	P05362	ICAM1	ICAM1	6.50664	CM	58
C60_59	C60	P05362	ICAM1	ICAM1	6.97098	CM	59
C114_60	C114	P05362	ICAM1	ICAM1	6.84462	CM	60
C60_61	C60	P05362	ICAM1	ICAM1	7.03515	CM	61
C114_62	C114	P05362	ICAM1	ICAM1	7.31914	CM	62
C139_63	C139	P05362	ICAM1	ICAM1	6.19402	CM	63
C31_65	C31	P05362	ICAM1	ICAM1	6.37082	CM	65
C40_66	C40	P05362	ICAM1	ICAM1	6.63428	CM	66
C58_67	C58	P05362	ICAM1	ICAM1	6.72239	CM	67
C40_69	C40	P05362	ICAM1	ICAM1	6.43354	CM	69
C104_71	C104	P05362	ICAM1	ICAM1	6.05632	CM	71
C187_72	C187	P05362	ICAM1	ICAM1	6.3888	CM	72
C31_73	C31	P05362	ICAM1	ICAM1	6.36973	CM	73
C65_74	C65	P05362	ICAM1	ICAM1	7.02756	CM	74
C65_75	C65	P05362	ICAM1	ICAM1	7.72341	CM	75
C31_78	C31	P05362	ICAM1	ICAM1	6.36638	CM	78
C31_79	C31	P05362	ICAM1	ICAM1	6.34702	CM	79
C40_80	C40	P05362	ICAM1	ICAM1	6.8845	CM	80
C141_81	C141	P05362	ICAM1	ICAM1	6.68459	CM	81
C123_82	C123	P05362	ICAM1	ICAM1	6.47177	CM	82
C123_84	C123	P05362	ICAM1	ICAM1	7.39747	CM	84
C31_85	C31	P05362	ICAM1	ICAM1	5.84773	CM	85
C40_86	C40	P05362	ICAM1	ICAM1	6.55079	CM	86
C40_87	C40	P05362	ICAM1	ICAM1	7.04614	CM	87
C116_88	C116	P05362	ICAM1	ICAM1	7.22542	CM	88
C34_89	C34	P05362	ICAM1	ICAM1	6.9158	CM	89
C113_90	C113	P05362	ICAM1	ICAM1	7.5491	CM	90
C21_91	C21	P05362	ICAM1	ICAM1	7.36411	CM	91
C47_93	C47	P05362	ICAM1	ICAM1	6.42086	CM	93
C132_94	C132	P05362	ICAM1	ICAM1	6.95665	CM	94
C113_95	C113	P05362	ICAM1	ICAM1	7.60914	CM	95
C23_96	C23	P05362	ICAM1	ICAM1	7.33157	CM	96
C237_97	C237	P05362	ICAM1	ICAM1	7.05327	CM	97
C126_98	C126	P05362	ICAM1	ICAM1	6.5482	CM	98
C47_99	C47	P05362	ICAM1	ICAM1	6.09687	CM	99
C47_100	C47	P05362	ICAM1	ICAM1	5.96925	CM	100
C127_101	C127	P05362	ICAM1	ICAM1	7.30507	CM	101
C113_102	C113	P05362	ICAM1	ICAM1	6.95648	CM	102
C126_103	C126	P05362	ICAM1	ICAM1	6.84488	CM	103
C110_105	C110	P05362	ICAM1	ICAM1	6.44949	CM	105
C167_106	C167	P05362	ICAM1	ICAM1	7.09348	CM	106
C34_107	C34	P05362	ICAM1	ICAM1	6.79317	CM	107
C69_108	C69	P05362	ICAM1	ICAM1	6.13008	CM	108
C116_109	C116	P05362	ICAM1	ICAM1	7.02137	CM	109
C113_110	C113	P05362	ICAM1	ICAM1	7.30702	CM	110
C42_111	C42	P05362	ICAM1	ICAM1	6.9924	CM	111
C42_112	C42	P05362	ICAM1	ICAM1	6.84437	CM	112
C132_113	C132	P05362	ICAM1	ICAM1	6.57327	CM	113
C116_115	C116	P05362	ICAM1	ICAM1	7.38007	CM	115
C126_116	C126	P05362	ICAM1	ICAM1	7.0197	CM	116
C116_117	C116	P05362	ICAM1	ICAM1	6.75525	CM	117
C23_118	C23	P05362	ICAM1	ICAM1	7.15808	CM	118
C21_119	C21	P05362	ICAM1	ICAM1	7.14008	CM	119
C126_120	C126	P05362	ICAM1	ICAM1	6.55718	CM	120
C248_121	C248	P05362	ICAM1	ICAM1	6.48155	CM	121
C153_122	C153	P05362	ICAM1	ICAM1	7.016	CM	122
C34_123	C34	P05362	ICAM1	ICAM1	6.86769	CM	123
C132_124	C132	P05362	ICAM1	ICAM1	6.59156	CM	124
C126_125	C126	P05362	ICAM1	ICAM1	6.84229	CM	125
C47_127	C47	P05362	ICAM1	ICAM1	6.23786	CM	127
C21_128	C21	P05362	ICAM1	ICAM1	6.98783	CM	128
C110_129	C110	P05362	ICAM1	ICAM1	6.78799	CM	129
C127_131	C127	P05362	ICAM1	ICAM1	7.75759	CM	131
C21_133	C21	P05362	ICAM1	ICAM1	7.15101	CM	133
C47_134	C47	P05362	ICAM1	ICAM1	6.09356	CM	134
C127_136	C127	P05362	ICAM1	ICAM1	7.19894	CM	136
C110_137	C110	P05362	ICAM1	ICAM1	6.7341	CM	137
C21_138	C21	P05362	ICAM1	ICAM1	7.76701	CM	138
C113_139	C113	P05362	ICAM1	ICAM1	7.31803	CM	139
C42_142	C42	P05362	ICAM1	ICAM1	6.61599	CM	142
C127_143	C127	P05362	ICAM1	ICAM1	7.4955	CM	143
C23_144	C23	P05362	ICAM1	ICAM1	7.24178	CM	144
C23_145	C23	P05362	ICAM1	ICAM1	7.33173	CM	145
C113_146	C113	P05362	ICAM1	ICAM1	7.26915	CM	146
C132_147	C132	P05362	ICAM1	ICAM1	6.72309	CM	147
C116_148	C116	P05362	ICAM1	ICAM1	7.06443	CM	148
C127_149	C127	P05362	ICAM1	ICAM1	7.3341	CM	149
C163_150	C163	P05362	ICAM1	ICAM1	6.60677	CM	150
C110_151	C110	P05362	ICAM1	ICAM1	6.46393	CM	151
C42_152	C42	P05362	ICAM1	ICAM1	6.45905	CM	152
C152_154	C152	P05362	ICAM1	ICAM1	6.84177	CM	154
C47_155	C47	P05362	ICAM1	ICAM1	6.09285	CM	155
C132_156	C132	P05362	ICAM1	ICAM1	6.52362	CM	156
C127_157	C127	P05362	ICAM1	ICAM1	6.96379	CM	157
C108_159	C108	P05362	ICAM1	ICAM1	6.12028	CM	159
C196_160	C196	P05362	ICAM1	ICAM1	7.02853	CM	160
C34_161	C34	P05362	ICAM1	ICAM1	6.95022	CM	161
C116_162	C116	P05362	ICAM1	ICAM1	7.21917	CM	162
C126_163	C126	P05362	ICAM1	ICAM1	6.64988	CM	163
C21_164	C21	P05362	ICAM1	ICAM1	7.13332	CM	164
C42_166	C42	P05362	ICAM1	ICAM1	6.89661	CM	166
C34_167	C34	P05362	ICAM1	ICAM1	6.95054	CM	167
C103_169	C103	P05362	ICAM1	ICAM1	6.41219	CM	169
C23_170	C23	P05362	ICAM1	ICAM1	7.20105	CM	170
C42_171	C42	P05362	ICAM1	ICAM1	6.85497	CM	171
C23_172	C23	P05362	ICAM1	ICAM1	7.41625	CM	172
C34_173	C34	P05362	ICAM1	ICAM1	6.85706	CM	173
C132_174	C132	P05362	ICAM1	ICAM1	6.51067	CM	174
C80_176	C80	P05362	ICAM1	ICAM1	6.72999	CM	176
C24_177	C24	P05362	ICAM1	ICAM1	7.4893	CM	177
C7_178	C7	P05362	ICAM1	ICAM1	6.75421	CM	178
C20_179	C20	P05362	ICAM1	ICAM1	7.1439	CM	179
C63_181	C63	P05362	ICAM1	ICAM1	6.94961	CM	181
C12_182	C12	P05362	ICAM1	ICAM1	7.31311	CM	182
C7_183	C7	P05362	ICAM1	ICAM1	6.76295	CM	183
C22_184	C22	P05362	ICAM1	ICAM1	7.05924	CM	184
C166_185	C166	P05362	ICAM1	ICAM1	6.47365	CM	185
C9_186	C9	P05362	ICAM1	ICAM1	6.94193	CM	186
C50_187	C50	P05362	ICAM1	ICAM1	7.87721	CM	187
C32_188	C32	P05362	ICAM1	ICAM1	6.6314	CM	188
C11_189	C11	P05362	ICAM1	ICAM1	6.61888	CM	189
C7_190	C7	P05362	ICAM1	ICAM1	6.84038	CM	190
C9_191	C9	P05362	ICAM1	ICAM1	6.85927	CM	191
C63_193	C63	P05362	ICAM1	ICAM1	7.46651	CM	193
C169_194	C169	P05362	ICAM1	ICAM1	6.50173	CM	194
C24_195	C24	P05362	ICAM1	ICAM1	7.26248	CM	195
C29_196	C29	P05362	ICAM1	ICAM1	6.44408	CM	196
C80_197	C80	P05362	ICAM1	ICAM1	6.77051	CM	197
C7_198	C7	P05362	ICAM1	ICAM1	6.63356	CM	198
C50_199	C50	P05362	ICAM1	ICAM1	7.31445	CM	199
C27_200	C27	P05362	ICAM1	ICAM1	7.40178	CM	200
C128_201	C128	P05362	ICAM1	ICAM1	7.63892	CM	201
C80_203	C80	P05362	ICAM1	ICAM1	6.84769	CM	203
C9_204	C9	P05362	ICAM1	ICAM1	6.58037	CM	204
C80_205	C80	P05362	ICAM1	ICAM1	6.85583	CM	205
C22_206	C22	P05362	ICAM1	ICAM1	6.77278	CM	206
C20_207	C20	P05362	ICAM1	ICAM1	6.68064	CM	207
C9_208	C9	P05362	ICAM1	ICAM1	6.80755	CM	208
C89_209	C89	P05362	ICAM1	ICAM1	6.84155	CM	209
C212_210	C212	P05362	ICAM1	ICAM1	6.2994	CM	210
C24_211	C24	P05362	ICAM1	ICAM1	6.80916	CM	211
C12_212	C12	P05362	ICAM1	ICAM1	7.3932	CM	212
C9_213	C9	P05362	ICAM1	ICAM1	6.98068	CM	213
C63_215	C63	P05362	ICAM1	ICAM1	7.32803	CM	215
C63_217	C63	P05362	ICAM1	ICAM1	7.23911	CM	217
C128_218	C128	P05362	ICAM1	ICAM1	7.3911	CM	218
C11_219	C11	P05362	ICAM1	ICAM1	6.09383	CM	219
C63_222	C63	P05362	ICAM1	ICAM1	7.39788	CM	222
C12_224	C12	P05362	ICAM1	ICAM1	7.16967	CM	224
C37_225	C37	P05362	ICAM1	ICAM1	6.47215	CM	225
C20_226	C20	P05362	ICAM1	ICAM1	6.97934	CM	226
C7_227	C7	P05362	ICAM1	ICAM1	6.66007	CM	227
C50_230	C50	P05362	ICAM1	ICAM1	7.05387	CM	230
C11_231	C11	P05362	ICAM1	ICAM1	6.53327	CM	231
C22_232	C22	P05362	ICAM1	ICAM1	6.77508	CM	232
C22_233	C22	P05362	ICAM1	ICAM1	7.04799	CM	233
C7_234	C7	P05362	ICAM1	ICAM1	6.71843	CM	234
C12_235	C12	P05362	ICAM1	ICAM1	7.41428	CM	235
C80_236	C80	P05362	ICAM1	ICAM1	6.80734	CM	236
C11_237	C11	P05362	ICAM1	ICAM1	6.59306	CM	237
C142_238	C142	P05362	ICAM1	ICAM1	6.50139	CM	238
C37_239	C37	P05362	ICAM1	ICAM1	6.89211	CM	239
C27_240	C27	P05362	ICAM1	ICAM1	6.15116	CM	240
C128_241	C128	P05362	ICAM1	ICAM1	7.42088	CM	241
C193_242	C193	P05362	ICAM1	ICAM1	6.42832	CM	242
C50_243	C50	P05362	ICAM1	ICAM1	7.65306	CM	243
C128_244	C128	P05362	ICAM1	ICAM1	6.97406	CM	244
C11_245	C11	P05362	ICAM1	ICAM1	6.39804	CM	245
C134_247	C134	P05362	ICAM1	ICAM1	6.74377	CM	247
C240_248	C240	P05362	ICAM1	ICAM1	7.15706	CM	248
C27_249	C27	P05362	ICAM1	ICAM1	6.80046	CM	249
C80_250	C80	P05362	ICAM1	ICAM1	7.0345	CM	250
C9_251	C9	P05362	ICAM1	ICAM1	6.69628	CM	251
C20_252	C20	P05362	ICAM1	ICAM1	6.71738	CM	252
C27_254	C27	P05362	ICAM1	ICAM1	7.31067	CM	254
C32_255	C32	P05362	ICAM1	ICAM1	6.66808	CM	255
C128_256	C128	P05362	ICAM1	ICAM1	7.64289	CM	256
C234_257	C234	P05362	ICAM1	ICAM1	6.78934	CM	257
C20_258	C20	P05362	ICAM1	ICAM1	7.0087	CM	258
C27_259	C27	P05362	ICAM1	ICAM1	7.25686	CM	259
C22_260	C22	P05362	ICAM1	ICAM1	7.05573	CM	260
C24_261	C24	P05362	ICAM1	ICAM1	7.38022	CM	261
C12_262	C12	P05362	ICAM1	ICAM1	7.46729	CM	262
C87_264	C87	P05362	ICAM1	ICAM1	6.61015	CM	264
C59_267	C59	P05362	ICAM1	ICAM1	6.823	CM	267
C25_268	C25	P05362	ICAM1	ICAM1	6.6623	CM	268
C48_269	C48	P05362	ICAM1	ICAM1	6.73997	CM	269
C129_270	C129	P05362	ICAM1	ICAM1	6.64178	CM	270
C87_271	C87	P05362	ICAM1	ICAM1	6.86102	CM	271
C73_272	C73	P05362	ICAM1	ICAM1	7.1131	CM	272
C242_273	C242	P05362	ICAM1	ICAM1	6.53249	CM	273
C93_274	C93	P05362	ICAM1	ICAM1	6.32035	CM	274
C82_275	C82	P05362	ICAM1	ICAM1	6.44627	CM	275
C82_276	C82	P05362	ICAM1	ICAM1	6.65474	CM	276
C125_277	C125	P05362	ICAM1	ICAM1	7.5332	CM	277
C68_278	C68	P05362	ICAM1	ICAM1	7.45337	CM	278
C124_279	C124	P05362	ICAM1	ICAM1	7.44451	CM	279
C105_280	C105	P05362	ICAM1	ICAM1	6.58752	CM	280
C66_281	C66	P05362	ICAM1	ICAM1	7.04746	CM	281
C214_282	C214	P05362	ICAM1	ICAM1	6.65896	CM	282
C99_283	C99	P05362	ICAM1	ICAM1	8.67802	CM	283
C251_284	C251	P05362	ICAM1	ICAM1	6.7871	CM	284
C87_285	C87	P05362	ICAM1	ICAM1	6.90052	CM	285
C68_286	C68	P05362	ICAM1	ICAM1	7.27895	CM	286
C36_287	C36	P05362	ICAM1	ICAM1	6.68017	CM	287
C36_288	C36	P05362	ICAM1	ICAM1	6.82724	CM	288
C105_290	C105	P05362	ICAM1	ICAM1	6.6391	CM	290
C93_291	C93	P05362	ICAM1	ICAM1	6.72492	CM	291
C124_292	C124	P05362	ICAM1	ICAM1	7.72354	CM	292
C87_293	C87	P05362	ICAM1	ICAM1	7.16024	CM	293
C73_294	C73	P05362	ICAM1	ICAM1	7.64035	CM	294
C59_295	C59	P05362	ICAM1	ICAM1	6.52935	CM	295
C124_296	C124	P05362	ICAM1	ICAM1	7.2381	CM	296
C64_297	C64	P05362	ICAM1	ICAM1	7.24934	CM	297
C137_298	C137	P05362	ICAM1	ICAM1	6.68767	CM	298
C99_299	C99	P05362	ICAM1	ICAM1	7.83944	CM	299
C129_300	C129	P05362	ICAM1	ICAM1	6.93721	CM	300
C93_301	C93	P05362	ICAM1	ICAM1	6.55148	CM	301
C18_302	C18	P05362	ICAM1	ICAM1	7.04051	CM	302
C48_303	C48	P05362	ICAM1	ICAM1	6.61225	CM	303
C25_304	C25	P05362	ICAM1	ICAM1	6.97734	CM	304
C49_305	C49	P05362	ICAM1	ICAM1	7.40797	CM	305
C124_307	C124	P05362	ICAM1	ICAM1	7.54599	CM	307
C25_309	C25	P05362	ICAM1	ICAM1	6.96171	CM	309
C49_310	C49	P05362	ICAM1	ICAM1	6.86376	CM	310
C129_312	C129	P05362	ICAM1	ICAM1	6.82657	CM	312
C66_313	C66	P05362	ICAM1	ICAM1	6.95749	CM	313
C59_314	C59	P05362	ICAM1	ICAM1	6.89179	CM	314
C68_315	C68	P05362	ICAM1	ICAM1	7.4967	CM	315
C105_316	C105	P05362	ICAM1	ICAM1	6.52813	CM	316
C105_317	C105	P05362	ICAM1	ICAM1	6.72764	CM	317
C36_318	C36	P05362	ICAM1	ICAM1	6.90443	CM	318
C125_319	C125	P05362	ICAM1	ICAM1	7.4466	CM	319
C73_320	C73	P05362	ICAM1	ICAM1	7.06461	CM	320
C99_321	C99	P05362	ICAM1	ICAM1	7.29873	CM	321
C68_322	C68	P05362	ICAM1	ICAM1	7.13018	CM	322
C129_323	C129	P05362	ICAM1	ICAM1	6.70158	CM	323
C87_324	C87	P05362	ICAM1	ICAM1	6.76976	CM	324
C125_325	C125	P05362	ICAM1	ICAM1	7.3252	CM	325
C195_326	C195	P05362	ICAM1	ICAM1	7.40317	CM	326
C105_327	C105	P05362	ICAM1	ICAM1	6.50783	CM	327
C17_328	C17	P05362	ICAM1	ICAM1	6.7075	CM	328
C18_329	C18	P05362	ICAM1	ICAM1	6.60081	CM	329
C164_330	C164	P05362	ICAM1	ICAM1	7.07225	CM	330
C82_331	C82	P05362	ICAM1	ICAM1	6.53038	CM	331
C125_333	C125	P05362	ICAM1	ICAM1	7.77676	CM	333
C105_334	C105	P05362	ICAM1	ICAM1	6.52718	CM	334
C130_335	C130	P05362	ICAM1	ICAM1	7.17563	CM	335
C180_336	C180	P05362	ICAM1	ICAM1	5.99426	CM	336
C149_337	C149	P05362	ICAM1	ICAM1	7.30283	CM	337
C93_338	C93	P05362	ICAM1	ICAM1	6.12617	CM	338
C93_339	C93	P05362	ICAM1	ICAM1	6.22919	CM	339
C25_340	C25	P05362	ICAM1	ICAM1	7.08911	CM	340
C17_342	C17	P05362	ICAM1	ICAM1	6.74328	CM	342
C105_343	C105	P05362	ICAM1	ICAM1	6.53344	CM	343
C18_344	C18	P05362	ICAM1	ICAM1	6.64795	CM	344
C189_345	C189	P05362	ICAM1	ICAM1	7.47741	CM	345
C59_346	C59	P05362	ICAM1	ICAM1	7.11113	CM	346
C17_347	C17	P05362	ICAM1	ICAM1	6.82822	CM	347
C73_348	C73	P05362	ICAM1	ICAM1	7.33837	CM	348
C99_349	C99	P05362	ICAM1	ICAM1	8.55919	CM	349
C18_351	C18	P05362	ICAM1	ICAM1	6.73266	CM	351
C246_352	C246	P05362	ICAM1	ICAM1	6.90931	CM	352
C84_353	C84	P05362	ICAM1	ICAM1	8.01613	CM	353
C241_354	C241	P05362	ICAM1	ICAM1	6.64614	CM	354
C67_355	C67	P05362	ICAM1	ICAM1	6.89337	CM	355
C106_360	C106	P05362	ICAM1	ICAM1	6.7136	CM	360
C224_361	C224	P05362	ICAM1	ICAM1	7.28208	CM	361
C77_363	C77	P05362	ICAM1	ICAM1	7.31239	CM	363
C161_364	C161	P05362	ICAM1	ICAM1	6.62757	CM	364
C85_365	C85	P05362	ICAM1	ICAM1	6.55401	CM	365
C197_366	C197	P05362	ICAM1	ICAM1	6.88824	CM	366
C173_367	C173	P05362	ICAM1	ICAM1	6.79698	CM	367
C245_368	C245	P05362	ICAM1	ICAM1	6.56961	CM	368
C57_371	C57	P05362	ICAM1	ICAM1	6.97797	CM	371
C70_372	C70	P05362	ICAM1	ICAM1	6.97763	CM	372
C77_374	C77	P05362	ICAM1	ICAM1	7.42731	CM	374
C60_1	C60	O00533	CHL1	CHL1	3.84014	CM	1
C31_2	C31	O00533	CHL1	CHL1	3.28707	CM	2
C60_3	C60	O00533	CHL1	CHL1	3.09612	CM	3
C10_6	C10	O00533	CHL1	CHL1	3.13763	CM	6
C114_7	C114	O00533	CHL1	CHL1	3.1405	CM	7
C60_8	C60	O00533	CHL1	CHL1	3.87229	CM	8
C123_9	C123	O00533	CHL1	CHL1	3.85395	CM	9
C201_10	C201	O00533	CHL1	CHL1	3.61091	CM	10
C65_11	C65	O00533	CHL1	CHL1	3.83257	CM	11
C114_14	C114	O00533	CHL1	CHL1	3.14359	CM	14
C60_15	C60	O00533	CHL1	CHL1	3.55209	CM	15
C65_16	C65	O00533	CHL1	CHL1	3.40717	CM	16
C10_18	C10	O00533	CHL1	CHL1	3.10745	CM	18
C257_19	C257	O00533	CHL1	CHL1	3.84009	CM	19
C31_20	C31	O00533	CHL1	CHL1	2.92613	CM	20
C33_21	C33	O00533	CHL1	CHL1	3.25732	CM	21
C60_22	C60	O00533	CHL1	CHL1	3.76608	CM	22
C60_23	C60	O00533	CHL1	CHL1	3.64572	CM	23
C40_26	C40	O00533	CHL1	CHL1	2.81327	CM	26
C65_28	C65	O00533	CHL1	CHL1	3.7383	CM	28
C65_29	C65	O00533	CHL1	CHL1	3.6054	CM	29
C60_30	C60	O00533	CHL1	CHL1	3.80501	CM	30
C123_31	C123	O00533	CHL1	CHL1	4.02626	CM	31
C65_33	C65	O00533	CHL1	CHL1	3.91506	CM	33
C238_34	C238	O00533	CHL1	CHL1	3.6001	CM	34
C162_35	C162	O00533	CHL1	CHL1	2.88857	CM	35
C123_36	C123	O00533	CHL1	CHL1	3.90252	CM	36
C114_37	C114	O00533	CHL1	CHL1	2.86454	CM	37
C65_38	C65	O00533	CHL1	CHL1	3.96545	CM	38
C40_39	C40	O00533	CHL1	CHL1	2.48066	CM	39
C10_40	C10	O00533	CHL1	CHL1	2.39039	CM	40
C10_42	C10	O00533	CHL1	CHL1	2.61662	CM	42
C40_43	C40	O00533	CHL1	CHL1	2.78962	CM	43
C65_44	C65	O00533	CHL1	CHL1	3.42151	CM	44
C10_47	C10	O00533	CHL1	CHL1	2.56315	CM	47
C114_49	C114	O00533	CHL1	CHL1	3.38881	CM	49
C10_50	C10	O00533	CHL1	CHL1	3.13728	CM	50
C60_52	C60	O00533	CHL1	CHL1	3.82025	CM	52
C114_56	C114	O00533	CHL1	CHL1	3.52138	CM	56
C123_57	C123	O00533	CHL1	CHL1	4.50435	CM	57
C123_58	C123	O00533	CHL1	CHL1	3.95695	CM	58
C60_59	C60	O00533	CHL1	CHL1	3.69467	CM	59
C114_60	C114	O00533	CHL1	CHL1	2.87734	CM	60
C60_61	C60	O00533	CHL1	CHL1	3.66532	CM	61
C114_62	C114	O00533	CHL1	CHL1	3.39612	CM	62
C139_63	C139	O00533	CHL1	CHL1	2.99928	CM	63
C31_65	C31	O00533	CHL1	CHL1	3.25008	CM	65
C40_66	C40	O00533	CHL1	CHL1	3.09959	CM	66
C58_67	C58	O00533	CHL1	CHL1	3.337	CM	67
C40_69	C40	O00533	CHL1	CHL1	2.96361	CM	69
C104_71	C104	O00533	CHL1	CHL1	3.78165	CM	71
C187_72	C187	O00533	CHL1	CHL1	3.13723	CM	72
C31_73	C31	O00533	CHL1	CHL1	3.21375	CM	73
C65_74	C65	O00533	CHL1	CHL1	3.88341	CM	74
C65_75	C65	O00533	CHL1	CHL1	4.02349	CM	75
C31_78	C31	O00533	CHL1	CHL1	3.31918	CM	78
C31_79	C31	O00533	CHL1	CHL1	3.11735	CM	79
C40_80	C40	O00533	CHL1	CHL1	3.10037	CM	80
C141_81	C141	O00533	CHL1	CHL1	3.96541	CM	81
C123_82	C123	O00533	CHL1	CHL1	4.13397	CM	82
C123_84	C123	O00533	CHL1	CHL1	4.33658	CM	84
C31_85	C31	O00533	CHL1	CHL1	2.78452	CM	85
C40_86	C40	O00533	CHL1	CHL1	3.2931	CM	86
C40_87	C40	O00533	CHL1	CHL1	3.0764	CM	87
C116_88	C116	O00533	CHL1	CHL1	3.98258	CM	88
C34_89	C34	O00533	CHL1	CHL1	3.65719	CM	89
C113_90	C113	O00533	CHL1	CHL1	3.41285	CM	90
C21_91	C21	O00533	CHL1	CHL1	2.81984	CM	91
C47_93	C47	O00533	CHL1	CHL1	3.8886	CM	93
C132_94	C132	O00533	CHL1	CHL1	3.83874	CM	94
C113_95	C113	O00533	CHL1	CHL1	3.41875	CM	95
C23_96	C23	O00533	CHL1	CHL1	3.47713	CM	96
C237_97	C237	O00533	CHL1	CHL1	3.50573	CM	97
C126_98	C126	O00533	CHL1	CHL1	3.16788	CM	98
C47_99	C47	O00533	CHL1	CHL1	3.65637	CM	99
C47_100	C47	O00533	CHL1	CHL1	3.42784	CM	100
C127_101	C127	O00533	CHL1	CHL1	3.19575	CM	101
C113_102	C113	O00533	CHL1	CHL1	3.0185	CM	102
C126_103	C126	O00533	CHL1	CHL1	3.35505	CM	103
C110_105	C110	O00533	CHL1	CHL1	3.40944	CM	105
C167_106	C167	O00533	CHL1	CHL1	3.37168	CM	106
C34_107	C34	O00533	CHL1	CHL1	3.62661	CM	107
C69_108	C69	O00533	CHL1	CHL1	2.86663	CM	108
C116_109	C116	O00533	CHL1	CHL1	4.1419	CM	109
C113_110	C113	O00533	CHL1	CHL1	3.21269	CM	110
C42_111	C42	O00533	CHL1	CHL1	3.59486	CM	111
C42_112	C42	O00533	CHL1	CHL1	3.6154	CM	112
C132_113	C132	O00533	CHL1	CHL1	3.48769	CM	113
C116_115	C116	O00533	CHL1	CHL1	4.17702	CM	115
C126_116	C126	O00533	CHL1	CHL1	3.40493	CM	116
C116_117	C116	O00533	CHL1	CHL1	3.9683	CM	117
C23_118	C23	O00533	CHL1	CHL1	3.34271	CM	118
C21_119	C21	O00533	CHL1	CHL1	2.65121	CM	119
C126_120	C126	O00533	CHL1	CHL1	3.19512	CM	120
C248_121	C248	O00533	CHL1	CHL1	3.39347	CM	121
C153_122	C153	O00533	CHL1	CHL1	2.85035	CM	122
C34_123	C34	O00533	CHL1	CHL1	3.6483	CM	123
C132_124	C132	O00533	CHL1	CHL1	3.34863	CM	124
C126_125	C126	O00533	CHL1	CHL1	3.31053	CM	125
C47_127	C47	O00533	CHL1	CHL1	3.69065	CM	127
C21_128	C21	O00533	CHL1	CHL1	3.0286	CM	128
C110_129	C110	O00533	CHL1	CHL1	3.57373	CM	129
C127_131	C127	O00533	CHL1	CHL1	3.22025	CM	131
C21_133	C21	O00533	CHL1	CHL1	2.96036	CM	133
C47_134	C47	O00533	CHL1	CHL1	3.55735	CM	134
C127_136	C127	O00533	CHL1	CHL1	3.27185	CM	136
C110_137	C110	O00533	CHL1	CHL1	3.60698	CM	137
C21_138	C21	O00533	CHL1	CHL1	3.24138	CM	138
C113_139	C113	O00533	CHL1	CHL1	3.31685	CM	139
C42_142	C42	O00533	CHL1	CHL1	3.20983	CM	142
C127_143	C127	O00533	CHL1	CHL1	3.23946	CM	143
C23_144	C23	O00533	CHL1	CHL1	3.37406	CM	144
C23_145	C23	O00533	CHL1	CHL1	3.66206	CM	145
C113_146	C113	O00533	CHL1	CHL1	3.19464	CM	146
C132_147	C132	O00533	CHL1	CHL1	3.63528	CM	147
C116_148	C116	O00533	CHL1	CHL1	4.15381	CM	148
C127_149	C127	O00533	CHL1	CHL1	3.28408	CM	149
C163_150	C163	O00533	CHL1	CHL1	3.36168	CM	150
C110_151	C110	O00533	CHL1	CHL1	3.24462	CM	151
C42_152	C42	O00533	CHL1	CHL1	3.04952	CM	152
C152_154	C152	O00533	CHL1	CHL1	2.83354	CM	154
C47_155	C47	O00533	CHL1	CHL1	3.51406	CM	155
C132_156	C132	O00533	CHL1	CHL1	3.29309	CM	156
C127_157	C127	O00533	CHL1	CHL1	3.09154	CM	157
C108_159	C108	O00533	CHL1	CHL1	3.21517	CM	159
C196_160	C196	O00533	CHL1	CHL1	3.73562	CM	160
C34_161	C34	O00533	CHL1	CHL1	3.80575	CM	161
C116_162	C116	O00533	CHL1	CHL1	3.98452	CM	162
C126_163	C126	O00533	CHL1	CHL1	3.26207	CM	163
C21_164	C21	O00533	CHL1	CHL1	2.81828	CM	164
C42_166	C42	O00533	CHL1	CHL1	3.39861	CM	166
C34_167	C34	O00533	CHL1	CHL1	3.82014	CM	167
C103_169	C103	O00533	CHL1	CHL1	3.66703	CM	169
C23_170	C23	O00533	CHL1	CHL1	3.39363	CM	170
C42_171	C42	O00533	CHL1	CHL1	3.49398	CM	171
C23_172	C23	O00533	CHL1	CHL1	3.43877	CM	172
C34_173	C34	O00533	CHL1	CHL1	3.62543	CM	173
C132_174	C132	O00533	CHL1	CHL1	3.37067	CM	174
C80_176	C80	O00533	CHL1	CHL1	3.18277	CM	176
C24_177	C24	O00533	CHL1	CHL1	3.29337	CM	177
C7_178	C7	O00533	CHL1	CHL1	3.04512	CM	178
C20_179	C20	O00533	CHL1	CHL1	3.24909	CM	179
C63_181	C63	O00533	CHL1	CHL1	3.27604	CM	181
C12_182	C12	O00533	CHL1	CHL1	3.38652	CM	182
C7_183	C7	O00533	CHL1	CHL1	3.13195	CM	183
C22_184	C22	O00533	CHL1	CHL1	3.68189	CM	184
C166_185	C166	O00533	CHL1	CHL1	3.43848	CM	185
C9_186	C9	O00533	CHL1	CHL1	4.10418	CM	186
C50_187	C50	O00533	CHL1	CHL1	3.45897	CM	187
C32_188	C32	O00533	CHL1	CHL1	3.60634	CM	188
C11_189	C11	O00533	CHL1	CHL1	3.0894	CM	189
C7_190	C7	O00533	CHL1	CHL1	3.07467	CM	190
C9_191	C9	O00533	CHL1	CHL1	3.94196	CM	191
C63_193	C63	O00533	CHL1	CHL1	3.88817	CM	193
C169_194	C169	O00533	CHL1	CHL1	3.10395	CM	194
C24_195	C24	O00533	CHL1	CHL1	3.14938	CM	195
C29_196	C29	O00533	CHL1	CHL1	3.27997	CM	196
C80_197	C80	O00533	CHL1	CHL1	3.29232	CM	197
C7_198	C7	O00533	CHL1	CHL1	2.95706	CM	198
C50_199	C50	O00533	CHL1	CHL1	2.74163	CM	199
C27_200	C27	O00533	CHL1	CHL1	3.73116	CM	200
C128_201	C128	O00533	CHL1	CHL1	3.50275	CM	201
C80_203	C80	O00533	CHL1	CHL1	3.40203	CM	203
C9_204	C9	O00533	CHL1	CHL1	3.93762	CM	204
C80_205	C80	O00533	CHL1	CHL1	3.37641	CM	205
C22_206	C22	O00533	CHL1	CHL1	3.44922	CM	206
C20_207	C20	O00533	CHL1	CHL1	3.15237	CM	207
C9_208	C9	O00533	CHL1	CHL1	4.04812	CM	208
C89_209	C89	O00533	CHL1	CHL1	3.49064	CM	209
C212_210	C212	O00533	CHL1	CHL1	3.51751	CM	210
C24_211	C24	O00533	CHL1	CHL1	2.57808	CM	211
C12_212	C12	O00533	CHL1	CHL1	3.39965	CM	212
C9_213	C9	O00533	CHL1	CHL1	4.11189	CM	213
C63_215	C63	O00533	CHL1	CHL1	3.87464	CM	215
C63_217	C63	O00533	CHL1	CHL1	3.63215	CM	217
C128_218	C128	O00533	CHL1	CHL1	3.29819	CM	218
C11_219	C11	O00533	CHL1	CHL1	2.69538	CM	219
C63_222	C63	O00533	CHL1	CHL1	3.87213	CM	222
C12_224	C12	O00533	CHL1	CHL1	3.52319	CM	224
C37_225	C37	O00533	CHL1	CHL1	2.95208	CM	225
C20_226	C20	O00533	CHL1	CHL1	3.30862	CM	226
C7_227	C7	O00533	CHL1	CHL1	3.14539	CM	227
C50_230	C50	O00533	CHL1	CHL1	2.582	CM	230
C11_231	C11	O00533	CHL1	CHL1	3.22222	CM	231
C22_232	C22	O00533	CHL1	CHL1	3.45395	CM	232
C22_233	C22	O00533	CHL1	CHL1	3.49125	CM	233
C7_234	C7	O00533	CHL1	CHL1	3.11888	CM	234
C12_235	C12	O00533	CHL1	CHL1	3.6777	CM	235
C80_236	C80	O00533	CHL1	CHL1	3.3254	CM	236
C11_237	C11	O00533	CHL1	CHL1	3.31069	CM	237
C142_238	C142	O00533	CHL1	CHL1	3.21667	CM	238
C37_239	C37	O00533	CHL1	CHL1	3.01414	CM	239
C27_240	C27	O00533	CHL1	CHL1	2.88644	CM	240
C128_241	C128	O00533	CHL1	CHL1	3.4194	CM	241
C193_242	C193	O00533	CHL1	CHL1	3.31954	CM	242
C50_243	C50	O00533	CHL1	CHL1	3.34537	CM	243
C128_244	C128	O00533	CHL1	CHL1	3.39259	CM	244
C11_245	C11	O00533	CHL1	CHL1	2.82457	CM	245
C134_247	C134	O00533	CHL1	CHL1	3.59681	CM	247
C240_248	C240	O00533	CHL1	CHL1	3.41006	CM	248
C27_249	C27	O00533	CHL1	CHL1	3.48844	CM	249
C80_250	C80	O00533	CHL1	CHL1	3.69652	CM	250
C9_251	C9	O00533	CHL1	CHL1	3.87772	CM	251
C20_252	C20	O00533	CHL1	CHL1	2.99057	CM	252
C27_254	C27	O00533	CHL1	CHL1	3.68127	CM	254
C32_255	C32	O00533	CHL1	CHL1	3.48548	CM	255
C128_256	C128	O00533	CHL1	CHL1	3.65943	CM	256
C234_257	C234	O00533	CHL1	CHL1	3.54579	CM	257
C20_258	C20	O00533	CHL1	CHL1	3.16741	CM	258
C27_259	C27	O00533	CHL1	CHL1	3.75428	CM	259
C22_260	C22	O00533	CHL1	CHL1	3.61876	CM	260
C24_261	C24	O00533	CHL1	CHL1	3.35706	CM	261
C12_262	C12	O00533	CHL1	CHL1	3.45165	CM	262
C87_264	C87	O00533	CHL1	CHL1	3.45035	CM	264
C59_267	C59	O00533	CHL1	CHL1	3.51442	CM	267
C25_268	C25	O00533	CHL1	CHL1	2.98099	CM	268
C48_269	C48	O00533	CHL1	CHL1	3.41548	CM	269
C129_270	C129	O00533	CHL1	CHL1	3.1579	CM	270
C87_271	C87	O00533	CHL1	CHL1	3.8081	CM	271
C73_272	C73	O00533	CHL1	CHL1	3.06987	CM	272
C242_273	C242	O00533	CHL1	CHL1	3.43378	CM	273
C93_274	C93	O00533	CHL1	CHL1	3.43617	CM	274
C82_275	C82	O00533	CHL1	CHL1	3.01922	CM	275
C82_276	C82	O00533	CHL1	CHL1	3.05325	CM	276
C125_277	C125	O00533	CHL1	CHL1	2.90665	CM	277
C68_278	C68	O00533	CHL1	CHL1	3.78893	CM	278
C124_279	C124	O00533	CHL1	CHL1	3.67004	CM	279
C105_280	C105	O00533	CHL1	CHL1	3.3865	CM	280
C66_281	C66	O00533	CHL1	CHL1	3.30152	CM	281
C214_282	C214	O00533	CHL1	CHL1	3.65125	CM	282
C99_283	C99	O00533	CHL1	CHL1	3.91804	CM	283
C251_284	C251	O00533	CHL1	CHL1	3.83579	CM	284
C87_285	C87	O00533	CHL1	CHL1	3.71183	CM	285
C68_286	C68	O00533	CHL1	CHL1	3.57255	CM	286
C36_287	C36	O00533	CHL1	CHL1	2.96333	CM	287
C36_288	C36	O00533	CHL1	CHL1	2.85115	CM	288
C105_290	C105	O00533	CHL1	CHL1	3.45658	CM	290
C93_291	C93	O00533	CHL1	CHL1	3.80581	CM	291
C124_292	C124	O00533	CHL1	CHL1	3.75395	CM	292
C87_293	C87	O00533	CHL1	CHL1	4.02251	CM	293
C73_294	C73	O00533	CHL1	CHL1	3.53974	CM	294
C59_295	C59	O00533	CHL1	CHL1	3.5185	CM	295
C124_296	C124	O00533	CHL1	CHL1	3.41865	CM	296
C64_297	C64	O00533	CHL1	CHL1	3.70487	CM	297
C137_298	C137	O00533	CHL1	CHL1	3.12017	CM	298
C99_299	C99	O00533	CHL1	CHL1	3.57566	CM	299
C129_300	C129	O00533	CHL1	CHL1	3.33132	CM	300
C93_301	C93	O00533	CHL1	CHL1	3.61254	CM	301
C18_302	C18	O00533	CHL1	CHL1	3.40189	CM	302
C48_303	C48	O00533	CHL1	CHL1	3.10748	CM	303
C25_304	C25	O00533	CHL1	CHL1	3.02436	CM	304
C49_305	C49	O00533	CHL1	CHL1	4.11964	CM	305
C124_307	C124	O00533	CHL1	CHL1	3.74322	CM	307
C25_309	C25	O00533	CHL1	CHL1	3.13403	CM	309
C49_310	C49	O00533	CHL1	CHL1	3.79494	CM	310
C129_312	C129	O00533	CHL1	CHL1	3.46223	CM	312
C66_313	C66	O00533	CHL1	CHL1	3.08977	CM	313
C59_314	C59	O00533	CHL1	CHL1	3.29635	CM	314
C68_315	C68	O00533	CHL1	CHL1	3.83844	CM	315
C105_316	C105	O00533	CHL1	CHL1	3.04084	CM	316
C105_317	C105	O00533	CHL1	CHL1	3.33762	CM	317
C36_318	C36	O00533	CHL1	CHL1	2.98878	CM	318
C125_319	C125	O00533	CHL1	CHL1	2.92446	CM	319
C73_320	C73	O00533	CHL1	CHL1	3.16862	CM	320
C99_321	C99	O00533	CHL1	CHL1	3.48995	CM	321
C68_322	C68	O00533	CHL1	CHL1	3.63068	CM	322
C129_323	C129	O00533	CHL1	CHL1	3.49762	CM	323
C87_324	C87	O00533	CHL1	CHL1	3.70846	CM	324
C125_325	C125	O00533	CHL1	CHL1	2.97186	CM	325
C195_326	C195	O00533	CHL1	CHL1	3.92702	CM	326
C105_327	C105	O00533	CHL1	CHL1	3.27283	CM	327
C17_328	C17	O00533	CHL1	CHL1	3.50068	CM	328
C18_329	C18	O00533	CHL1	CHL1	3.18064	CM	329
C164_330	C164	O00533	CHL1	CHL1	3.83784	CM	330
C82_331	C82	O00533	CHL1	CHL1	3.16959	CM	331
C125_333	C125	O00533	CHL1	CHL1	3.2029	CM	333
C105_334	C105	O00533	CHL1	CHL1	3.45965	CM	334
C130_335	C130	O00533	CHL1	CHL1	3.50129	CM	335
C180_336	C180	O00533	CHL1	CHL1	3.26169	CM	336
C149_337	C149	O00533	CHL1	CHL1	3.73267	CM	337
C93_338	C93	O00533	CHL1	CHL1	3.27068	CM	338
C93_339	C93	O00533	CHL1	CHL1	3.35032	CM	339
C25_340	C25	O00533	CHL1	CHL1	3.19407	CM	340
C17_342	C17	O00533	CHL1	CHL1	3.6375	CM	342
C105_343	C105	O00533	CHL1	CHL1	3.31218	CM	343
C18_344	C18	O00533	CHL1	CHL1	3.28058	CM	344
C189_345	C189	O00533	CHL1	CHL1	3.36118	CM	345
C59_346	C59	O00533	CHL1	CHL1	3.80576	CM	346
C17_347	C17	O00533	CHL1	CHL1	3.356	CM	347
C73_348	C73	O00533	CHL1	CHL1	3.02721	CM	348
C99_349	C99	O00533	CHL1	CHL1	3.74157	CM	349
C18_351	C18	O00533	CHL1	CHL1	3.00505	CM	351
C246_352	C246	O00533	CHL1	CHL1	3.83768	CM	352
C84_353	C84	O00533	CHL1	CHL1	3.31872	CM	353
C241_354	C241	O00533	CHL1	CHL1	3.30938	CM	354
C67_355	C67	O00533	CHL1	CHL1	3.1087	CM	355
C106_360	C106	O00533	CHL1	CHL1	3.21905	CM	360
C224_361	C224	O00533	CHL1	CHL1	3.75044	CM	361
C77_363	C77	O00533	CHL1	CHL1	3.21414	CM	363
C161_364	C161	O00533	CHL1	CHL1	3.6784	CM	364
C85_365	C85	O00533	CHL1	CHL1	4.12606	CM	365
C197_366	C197	O00533	CHL1	CHL1	4.08438	CM	366
C173_367	C173	O00533	CHL1	CHL1	3.62683	CM	367
C245_368	C245	O00533	CHL1	CHL1	3.05508	CM	368
C57_371	C57	O00533	CHL1	CHL1	4.04585	CM	371
C70_372	C70	O00533	CHL1	CHL1	3.12774	CM	372
C77_374	C77	O00533	CHL1	CHL1	3.23432	CM	374
C60_1	C60	Q15582	TGFBI	TGFBI	9.35656	CM	1
C31_2	C31	Q15582	TGFBI	TGFBI	9.32484	CM	2
C60_3	C60	Q15582	TGFBI	TGFBI	8.74418	CM	3
C10_6	C10	Q15582	TGFBI	TGFBI	8.61604	CM	6
C114_7	C114	Q15582	TGFBI	TGFBI	8.37391	CM	7
C60_8	C60	Q15582	TGFBI	TGFBI	9.75463	CM	8
C123_9	C123	Q15582	TGFBI	TGFBI	8.9821	CM	9
C201_10	C201	Q15582	TGFBI	TGFBI	9.03769	CM	10
C65_11	C65	Q15582	TGFBI	TGFBI	9.064	CM	11
C114_14	C114	Q15582	TGFBI	TGFBI	8.9916	CM	14
C60_15	C60	Q15582	TGFBI	TGFBI	8.91741	CM	15
C65_16	C65	Q15582	TGFBI	TGFBI	8.88795	CM	16
C10_18	C10	Q15582	TGFBI	TGFBI	8.70151	CM	18
C257_19	C257	Q15582	TGFBI	TGFBI	8.03638	CM	19
C31_20	C31	Q15582	TGFBI	TGFBI	8.68358	CM	20
C33_21	C33	Q15582	TGFBI	TGFBI	8.34583	CM	21
C60_22	C60	Q15582	TGFBI	TGFBI	9.26589	CM	22
C60_23	C60	Q15582	TGFBI	TGFBI	9.18117	CM	23
C40_26	C40	Q15582	TGFBI	TGFBI	9.61398	CM	26
C65_28	C65	Q15582	TGFBI	TGFBI	8.83869	CM	28
C65_29	C65	Q15582	TGFBI	TGFBI	8.71872	CM	29
C60_30	C60	Q15582	TGFBI	TGFBI	9.96232	CM	30
C123_31	C123	Q15582	TGFBI	TGFBI	9.13976	CM	31
C65_33	C65	Q15582	TGFBI	TGFBI	8.99554	CM	33
C238_34	C238	Q15582	TGFBI	TGFBI	8.76509	CM	34
C162_35	C162	Q15582	TGFBI	TGFBI	8.12	CM	35
C123_36	C123	Q15582	TGFBI	TGFBI	8.35011	CM	36
C114_37	C114	Q15582	TGFBI	TGFBI	8.31233	CM	37
C65_38	C65	Q15582	TGFBI	TGFBI	9.3097	CM	38
C40_39	C40	Q15582	TGFBI	TGFBI	8.46573	CM	39
C10_40	C10	Q15582	TGFBI	TGFBI	7.58362	CM	40
C10_42	C10	Q15582	TGFBI	TGFBI	8.33551	CM	42
C40_43	C40	Q15582	TGFBI	TGFBI	9.68142	CM	43
C65_44	C65	Q15582	TGFBI	TGFBI	8.53429	CM	44
C10_47	C10	Q15582	TGFBI	TGFBI	8.30212	CM	47
C114_49	C114	Q15582	TGFBI	TGFBI	8.62806	CM	49
C10_50	C10	Q15582	TGFBI	TGFBI	8.46307	CM	50
C60_52	C60	Q15582	TGFBI	TGFBI	9.36246	CM	52
C114_56	C114	Q15582	TGFBI	TGFBI	8.5724	CM	56
C123_57	C123	Q15582	TGFBI	TGFBI	9.31331	CM	57
C123_58	C123	Q15582	TGFBI	TGFBI	8.07364	CM	58
C60_59	C60	Q15582	TGFBI	TGFBI	9.50877	CM	59
C114_60	C114	Q15582	TGFBI	TGFBI	7.89133	CM	60
C60_61	C60	Q15582	TGFBI	TGFBI	9.3572	CM	61
C114_62	C114	Q15582	TGFBI	TGFBI	9.18144	CM	62
C139_63	C139	Q15582	TGFBI	TGFBI	8.86235	CM	63
C31_65	C31	Q15582	TGFBI	TGFBI	8.95734	CM	65
C40_66	C40	Q15582	TGFBI	TGFBI	9.57957	CM	66
C58_67	C58	Q15582	TGFBI	TGFBI	8.99774	CM	67
C40_69	C40	Q15582	TGFBI	TGFBI	8.93426	CM	69
C104_71	C104	Q15582	TGFBI	TGFBI	7.94779	CM	71
C187_72	C187	Q15582	TGFBI	TGFBI	8.26409	CM	72
C31_73	C31	Q15582	TGFBI	TGFBI	8.91442	CM	73
C65_74	C65	Q15582	TGFBI	TGFBI	9.10458	CM	74
C65_75	C65	Q15582	TGFBI	TGFBI	9.27546	CM	75
C31_78	C31	Q15582	TGFBI	TGFBI	8.80604	CM	78
C31_79	C31	Q15582	TGFBI	TGFBI	8.94349	CM	79
C40_80	C40	Q15582	TGFBI	TGFBI	9.49198	CM	80
C141_81	C141	Q15582	TGFBI	TGFBI	8.67369	CM	81
C123_82	C123	Q15582	TGFBI	TGFBI	9.06511	CM	82
C123_84	C123	Q15582	TGFBI	TGFBI	9.2625	CM	84
C31_85	C31	Q15582	TGFBI	TGFBI	8.36793	CM	85
C40_86	C40	Q15582	TGFBI	TGFBI	8.80148	CM	86
C40_87	C40	Q15582	TGFBI	TGFBI	9.59129	CM	87
C116_88	C116	Q15582	TGFBI	TGFBI	9.37937	CM	88
C34_89	C34	Q15582	TGFBI	TGFBI	8.52995	CM	89
C113_90	C113	Q15582	TGFBI	TGFBI	9.22076	CM	90
C21_91	C21	Q15582	TGFBI	TGFBI	9.00792	CM	91
C47_93	C47	Q15582	TGFBI	TGFBI	9.25081	CM	93
C132_94	C132	Q15582	TGFBI	TGFBI	9.12146	CM	94
C113_95	C113	Q15582	TGFBI	TGFBI	8.96105	CM	95
C23_96	C23	Q15582	TGFBI	TGFBI	9.19489	CM	96
C237_97	C237	Q15582	TGFBI	TGFBI	9.2103	CM	97
C126_98	C126	Q15582	TGFBI	TGFBI	8.81911	CM	98
C47_99	C47	Q15582	TGFBI	TGFBI	8.53356	CM	99
C47_100	C47	Q15582	TGFBI	TGFBI	8.39981	CM	100
C127_101	C127	Q15582	TGFBI	TGFBI	9.60854	CM	101
C113_102	C113	Q15582	TGFBI	TGFBI	8.38965	CM	102
C126_103	C126	Q15582	TGFBI	TGFBI	8.93872	CM	103
C110_105	C110	Q15582	TGFBI	TGFBI	8.7385	CM	105
C167_106	C167	Q15582	TGFBI	TGFBI	9.53522	CM	106
C34_107	C34	Q15582	TGFBI	TGFBI	8.51077	CM	107
C69_108	C69	Q15582	TGFBI	TGFBI	8.03343	CM	108
C116_109	C116	Q15582	TGFBI	TGFBI	9.54794	CM	109
C113_110	C113	Q15582	TGFBI	TGFBI	8.76324	CM	110
C42_111	C42	Q15582	TGFBI	TGFBI	8.76588	CM	111
C42_112	C42	Q15582	TGFBI	TGFBI	8.67602	CM	112
C132_113	C132	Q15582	TGFBI	TGFBI	8.31733	CM	113
C116_115	C116	Q15582	TGFBI	TGFBI	9.401	CM	115
C126_116	C126	Q15582	TGFBI	TGFBI	9.14801	CM	116
C116_117	C116	Q15582	TGFBI	TGFBI	9.09311	CM	117
C23_118	C23	Q15582	TGFBI	TGFBI	8.93048	CM	118
C21_119	C21	Q15582	TGFBI	TGFBI	8.94193	CM	119
C126_120	C126	Q15582	TGFBI	TGFBI	8.68655	CM	120
C248_121	C248	Q15582	TGFBI	TGFBI	8.63657	CM	121
C153_122	C153	Q15582	TGFBI	TGFBI	9.81727	CM	122
C34_123	C34	Q15582	TGFBI	TGFBI	8.36299	CM	123
C132_124	C132	Q15582	TGFBI	TGFBI	8.55849	CM	124
C126_125	C126	Q15582	TGFBI	TGFBI	9.1024	CM	125
C47_127	C47	Q15582	TGFBI	TGFBI	9.0274	CM	127
C21_128	C21	Q15582	TGFBI	TGFBI	9.37675	CM	128
C110_129	C110	Q15582	TGFBI	TGFBI	9.00583	CM	129
C127_131	C127	Q15582	TGFBI	TGFBI	9.78013	CM	131
C21_133	C21	Q15582	TGFBI	TGFBI	9.40427	CM	133
C47_134	C47	Q15582	TGFBI	TGFBI	8.63917	CM	134
C127_136	C127	Q15582	TGFBI	TGFBI	9.43816	CM	136
C110_137	C110	Q15582	TGFBI	TGFBI	8.83735	CM	137
C21_138	C21	Q15582	TGFBI	TGFBI	9.40793	CM	138
C113_139	C113	Q15582	TGFBI	TGFBI	8.78176	CM	139
C42_142	C42	Q15582	TGFBI	TGFBI	8.45274	CM	142
C127_143	C127	Q15582	TGFBI	TGFBI	9.73208	CM	143
C23_144	C23	Q15582	TGFBI	TGFBI	9.10005	CM	144
C23_145	C23	Q15582	TGFBI	TGFBI	8.75592	CM	145
C113_146	C113	Q15582	TGFBI	TGFBI	8.57839	CM	146
C132_147	C132	Q15582	TGFBI	TGFBI	8.62356	CM	147
C116_148	C116	Q15582	TGFBI	TGFBI	9.36708	CM	148
C127_149	C127	Q15582	TGFBI	TGFBI	9.67708	CM	149
C163_150	C163	Q15582	TGFBI	TGFBI	9.00806	CM	150
C110_151	C110	Q15582	TGFBI	TGFBI	8.53296	CM	151
C42_152	C42	Q15582	TGFBI	TGFBI	8.12907	CM	152
C152_154	C152	Q15582	TGFBI	TGFBI	8.65665	CM	154
C47_155	C47	Q15582	TGFBI	TGFBI	8.56826	CM	155
C132_156	C132	Q15582	TGFBI	TGFBI	8.43322	CM	156
C127_157	C127	Q15582	TGFBI	TGFBI	9.34173	CM	157
C108_159	C108	Q15582	TGFBI	TGFBI	7.39979	CM	159
C196_160	C196	Q15582	TGFBI	TGFBI	8.83597	CM	160
C34_161	C34	Q15582	TGFBI	TGFBI	8.66186	CM	161
C116_162	C116	Q15582	TGFBI	TGFBI	8.72557	CM	162
C126_163	C126	Q15582	TGFBI	TGFBI	8.80968	CM	163
C21_164	C21	Q15582	TGFBI	TGFBI	9.22225	CM	164
C42_166	C42	Q15582	TGFBI	TGFBI	8.50205	CM	166
C34_167	C34	Q15582	TGFBI	TGFBI	8.54899	CM	167
C103_169	C103	Q15582	TGFBI	TGFBI	9.05972	CM	169
C23_170	C23	Q15582	TGFBI	TGFBI	9.21611	CM	170
C42_171	C42	Q15582	TGFBI	TGFBI	8.58437	CM	171
C23_172	C23	Q15582	TGFBI	TGFBI	8.89358	CM	172
C34_173	C34	Q15582	TGFBI	TGFBI	8.54627	CM	173
C132_174	C132	Q15582	TGFBI	TGFBI	8.44044	CM	174
C80_176	C80	Q15582	TGFBI	TGFBI	8.5464	CM	176
C24_177	C24	Q15582	TGFBI	TGFBI	8.82812	CM	177
C7_178	C7	Q15582	TGFBI	TGFBI	9.76309	CM	178
C20_179	C20	Q15582	TGFBI	TGFBI	8.33592	CM	179
C63_181	C63	Q15582	TGFBI	TGFBI	8.70424	CM	181
C12_182	C12	Q15582	TGFBI	TGFBI	9.02127	CM	182
C7_183	C7	Q15582	TGFBI	TGFBI	9.72728	CM	183
C22_184	C22	Q15582	TGFBI	TGFBI	9.37535	CM	184
C166_185	C166	Q15582	TGFBI	TGFBI	8.00607	CM	185
C9_186	C9	Q15582	TGFBI	TGFBI	8.78595	CM	186
C50_187	C50	Q15582	TGFBI	TGFBI	8.54781	CM	187
C32_188	C32	Q15582	TGFBI	TGFBI	8.3348	CM	188
C11_189	C11	Q15582	TGFBI	TGFBI	8.55642	CM	189
C7_190	C7	Q15582	TGFBI	TGFBI	9.85798	CM	190
C9_191	C9	Q15582	TGFBI	TGFBI	8.57161	CM	191
C63_193	C63	Q15582	TGFBI	TGFBI	8.95844	CM	193
C169_194	C169	Q15582	TGFBI	TGFBI	8.82299	CM	194
C24_195	C24	Q15582	TGFBI	TGFBI	8.65189	CM	195
C29_196	C29	Q15582	TGFBI	TGFBI	7.49877	CM	196
C80_197	C80	Q15582	TGFBI	TGFBI	8.87653	CM	197
C7_198	C7	Q15582	TGFBI	TGFBI	9.45758	CM	198
C50_199	C50	Q15582	TGFBI	TGFBI	7.9203	CM	199
C27_200	C27	Q15582	TGFBI	TGFBI	9.28943	CM	200
C128_201	C128	Q15582	TGFBI	TGFBI	9.47701	CM	201
C80_203	C80	Q15582	TGFBI	TGFBI	8.47277	CM	203
C9_204	C9	Q15582	TGFBI	TGFBI	8.41362	CM	204
C80_205	C80	Q15582	TGFBI	TGFBI	8.56296	CM	205
C22_206	C22	Q15582	TGFBI	TGFBI	9.26541	CM	206
C20_207	C20	Q15582	TGFBI	TGFBI	8.25909	CM	207
C9_208	C9	Q15582	TGFBI	TGFBI	8.75482	CM	208
C89_209	C89	Q15582	TGFBI	TGFBI	8.32211	CM	209
C212_210	C212	Q15582	TGFBI	TGFBI	8.17839	CM	210
C24_211	C24	Q15582	TGFBI	TGFBI	8.19418	CM	211
C12_212	C12	Q15582	TGFBI	TGFBI	9.15556	CM	212
C9_213	C9	Q15582	TGFBI	TGFBI	8.99486	CM	213
C63_215	C63	Q15582	TGFBI	TGFBI	9.27253	CM	215
C63_217	C63	Q15582	TGFBI	TGFBI	8.75648	CM	217
C128_218	C128	Q15582	TGFBI	TGFBI	9.1298	CM	218
C11_219	C11	Q15582	TGFBI	TGFBI	8.24094	CM	219
C63_222	C63	Q15582	TGFBI	TGFBI	9.03753	CM	222
C12_224	C12	Q15582	TGFBI	TGFBI	9.55383	CM	224
C37_225	C37	Q15582	TGFBI	TGFBI	8.80985	CM	225
C20_226	C20	Q15582	TGFBI	TGFBI	8.33016	CM	226
C7_227	C7	Q15582	TGFBI	TGFBI	9.70941	CM	227
C50_230	C50	Q15582	TGFBI	TGFBI	7.62503	CM	230
C11_231	C11	Q15582	TGFBI	TGFBI	8.80546	CM	231
C22_232	C22	Q15582	TGFBI	TGFBI	9.43534	CM	232
C22_233	C22	Q15582	TGFBI	TGFBI	9.08713	CM	233
C7_234	C7	Q15582	TGFBI	TGFBI	9.5588	CM	234
C12_235	C12	Q15582	TGFBI	TGFBI	9.1045	CM	235
C80_236	C80	Q15582	TGFBI	TGFBI	8.63245	CM	236
C11_237	C11	Q15582	TGFBI	TGFBI	8.92191	CM	237
C142_238	C142	Q15582	TGFBI	TGFBI	8.29032	CM	238
C37_239	C37	Q15582	TGFBI	TGFBI	9.02735	CM	239
C27_240	C27	Q15582	TGFBI	TGFBI	8.12319	CM	240
C128_241	C128	Q15582	TGFBI	TGFBI	8.95818	CM	241
C193_242	C193	Q15582	TGFBI	TGFBI	7.89843	CM	242
C50_243	C50	Q15582	TGFBI	TGFBI	8.6286	CM	243
C128_244	C128	Q15582	TGFBI	TGFBI	8.79053	CM	244
C11_245	C11	Q15582	TGFBI	TGFBI	8.0983	CM	245
C134_247	C134	Q15582	TGFBI	TGFBI	8.60159	CM	247
C240_248	C240	Q15582	TGFBI	TGFBI	9.67243	CM	248
C27_249	C27	Q15582	TGFBI	TGFBI	9.23648	CM	249
C80_250	C80	Q15582	TGFBI	TGFBI	8.62147	CM	250
C9_251	C9	Q15582	TGFBI	TGFBI	8.47695	CM	251
C20_252	C20	Q15582	TGFBI	TGFBI	8.25965	CM	252
C27_254	C27	Q15582	TGFBI	TGFBI	9.56222	CM	254
C32_255	C32	Q15582	TGFBI	TGFBI	8.76914	CM	255
C128_256	C128	Q15582	TGFBI	TGFBI	9.24097	CM	256
C234_257	C234	Q15582	TGFBI	TGFBI	8.53147	CM	257
C20_258	C20	Q15582	TGFBI	TGFBI	8.55728	CM	258
C27_259	C27	Q15582	TGFBI	TGFBI	9.07931	CM	259
C22_260	C22	Q15582	TGFBI	TGFBI	9.21799	CM	260
C24_261	C24	Q15582	TGFBI	TGFBI	8.73298	CM	261
C12_262	C12	Q15582	TGFBI	TGFBI	9.20297	CM	262
C87_264	C87	Q15582	TGFBI	TGFBI	8.2244	CM	264
C59_267	C59	Q15582	TGFBI	TGFBI	9.19015	CM	267
C25_268	C25	Q15582	TGFBI	TGFBI	8.9008	CM	268
C48_269	C48	Q15582	TGFBI	TGFBI	9.67025	CM	269
C129_270	C129	Q15582	TGFBI	TGFBI	9.09435	CM	270
C87_271	C87	Q15582	TGFBI	TGFBI	8.94197	CM	271
C73_272	C73	Q15582	TGFBI	TGFBI	8.38306	CM	272
C242_273	C242	Q15582	TGFBI	TGFBI	9.30847	CM	273
C93_274	C93	Q15582	TGFBI	TGFBI	8.68168	CM	274
C82_275	C82	Q15582	TGFBI	TGFBI	7.86299	CM	275
C82_276	C82	Q15582	TGFBI	TGFBI	8.20677	CM	276
C125_277	C125	Q15582	TGFBI	TGFBI	8.4264	CM	277
C68_278	C68	Q15582	TGFBI	TGFBI	9.42162	CM	278
C124_279	C124	Q15582	TGFBI	TGFBI	9.56047	CM	279
C105_280	C105	Q15582	TGFBI	TGFBI	8.1935	CM	280
C66_281	C66	Q15582	TGFBI	TGFBI	8.87972	CM	281
C214_282	C214	Q15582	TGFBI	TGFBI	8.19051	CM	282
C99_283	C99	Q15582	TGFBI	TGFBI	9.62105	CM	283
C251_284	C251	Q15582	TGFBI	TGFBI	8.78198	CM	284
C87_285	C87	Q15582	TGFBI	TGFBI	8.77743	CM	285
C68_286	C68	Q15582	TGFBI	TGFBI	9.21168	CM	286
C36_287	C36	Q15582	TGFBI	TGFBI	8.07433	CM	287
C36_288	C36	Q15582	TGFBI	TGFBI	8.45543	CM	288
C105_290	C105	Q15582	TGFBI	TGFBI	7.95548	CM	290
C93_291	C93	Q15582	TGFBI	TGFBI	8.91063	CM	291
C124_292	C124	Q15582	TGFBI	TGFBI	9.89438	CM	292
C87_293	C87	Q15582	TGFBI	TGFBI	9.29136	CM	293
C73_294	C73	Q15582	TGFBI	TGFBI	9.16898	CM	294
C59_295	C59	Q15582	TGFBI	TGFBI	8.70158	CM	295
C124_296	C124	Q15582	TGFBI	TGFBI	9.45612	CM	296
C64_297	C64	Q15582	TGFBI	TGFBI	8.87698	CM	297
C137_298	C137	Q15582	TGFBI	TGFBI	8.10855	CM	298
C99_299	C99	Q15582	TGFBI	TGFBI	8.6577	CM	299
C129_300	C129	Q15582	TGFBI	TGFBI	8.81984	CM	300
C93_301	C93	Q15582	TGFBI	TGFBI	8.75205	CM	301
C18_302	C18	Q15582	TGFBI	TGFBI	9.07465	CM	302
C48_303	C48	Q15582	TGFBI	TGFBI	8.76012	CM	303
C25_304	C25	Q15582	TGFBI	TGFBI	8.9637	CM	304
C49_305	C49	Q15582	TGFBI	TGFBI	8.95737	CM	305
C124_307	C124	Q15582	TGFBI	TGFBI	9.58734	CM	307
C25_309	C25	Q15582	TGFBI	TGFBI	8.7535	CM	309
C49_310	C49	Q15582	TGFBI	TGFBI	8.38931	CM	310
C129_312	C129	Q15582	TGFBI	TGFBI	8.50578	CM	312
C66_313	C66	Q15582	TGFBI	TGFBI	8.91839	CM	313
C59_314	C59	Q15582	TGFBI	TGFBI	9.13476	CM	314
C68_315	C68	Q15582	TGFBI	TGFBI	9.30933	CM	315
C105_316	C105	Q15582	TGFBI	TGFBI	8.03675	CM	316
C105_317	C105	Q15582	TGFBI	TGFBI	8.24156	CM	317
C36_318	C36	Q15582	TGFBI	TGFBI	8.62381	CM	318
C125_319	C125	Q15582	TGFBI	TGFBI	9.53296	CM	319
C73_320	C73	Q15582	TGFBI	TGFBI	8.43523	CM	320
C99_321	C99	Q15582	TGFBI	TGFBI	8.35904	CM	321
C68_322	C68	Q15582	TGFBI	TGFBI	9.07041	CM	322
C129_323	C129	Q15582	TGFBI	TGFBI	8.58574	CM	323
C87_324	C87	Q15582	TGFBI	TGFBI	8.75033	CM	324
C125_325	C125	Q15582	TGFBI	TGFBI	9.08224	CM	325
C195_326	C195	Q15582	TGFBI	TGFBI	8.5854	CM	326
C105_327	C105	Q15582	TGFBI	TGFBI	7.71252	CM	327
C17_328	C17	Q15582	TGFBI	TGFBI	9.3237	CM	328
C18_329	C18	Q15582	TGFBI	TGFBI	8.81697	CM	329
C164_330	C164	Q15582	TGFBI	TGFBI	8.91176	CM	330
C82_331	C82	Q15582	TGFBI	TGFBI	7.88198	CM	331
C125_333	C125	Q15582	TGFBI	TGFBI	8.8683	CM	333
C105_334	C105	Q15582	TGFBI	TGFBI	8.05845	CM	334
C130_335	C130	Q15582	TGFBI	TGFBI	8.71071	CM	335
C180_336	C180	Q15582	TGFBI	TGFBI	8.45821	CM	336
C149_337	C149	Q15582	TGFBI	TGFBI	8.63746	CM	337
C93_338	C93	Q15582	TGFBI	TGFBI	8.3281	CM	338
C93_339	C93	Q15582	TGFBI	TGFBI	8.41157	CM	339
C25_340	C25	Q15582	TGFBI	TGFBI	8.70782	CM	340
C17_342	C17	Q15582	TGFBI	TGFBI	9.0712	CM	342
C105_343	C105	Q15582	TGFBI	TGFBI	7.90324	CM	343
C18_344	C18	Q15582	TGFBI	TGFBI	8.8678	CM	344
C189_345	C189	Q15582	TGFBI	TGFBI	9.34709	CM	345
C59_346	C59	Q15582	TGFBI	TGFBI	9.18174	CM	346
C17_347	C17	Q15582	TGFBI	TGFBI	8.97305	CM	347
C73_348	C73	Q15582	TGFBI	TGFBI	8.26051	CM	348
C99_349	C99	Q15582	TGFBI	TGFBI	9.37695	CM	349
C18_351	C18	Q15582	TGFBI	TGFBI	8.84499	CM	351
C246_352	C246	Q15582	TGFBI	TGFBI	8.90679	CM	352
C84_353	C84	Q15582	TGFBI	TGFBI	9.27283	CM	353
C241_354	C241	Q15582	TGFBI	TGFBI	8.9992	CM	354
C67_355	C67	Q15582	TGFBI	TGFBI	8.8293	CM	355
C106_360	C106	Q15582	TGFBI	TGFBI	8.00085	CM	360
C224_361	C224	Q15582	TGFBI	TGFBI	9.295	CM	361
C77_363	C77	Q15582	TGFBI	TGFBI	8.37409	CM	363
C161_364	C161	Q15582	TGFBI	TGFBI	8.89314	CM	364
C85_365	C85	Q15582	TGFBI	TGFBI	8.65389	CM	365
C197_366	C197	Q15582	TGFBI	TGFBI	8.6711	CM	366
C173_367	C173	Q15582	TGFBI	TGFBI	9.37949	CM	367
C245_368	C245	Q15582	TGFBI	TGFBI	8.76214	CM	368
C57_371	C57	Q15582	TGFBI	TGFBI	9.03042	CM	371
C70_372	C70	Q15582	TGFBI	TGFBI	8.4078	CM	372
C77_374	C77	Q15582	TGFBI	TGFBI	8.27157	CM	374
C60_1	C60	P17813	ENG	ENG	1.8216	CM	1
C31_2	C31	P17813	ENG	ENG	2.34883	CM	2
C60_3	C60	P17813	ENG	ENG	1.42625	CM	3
C10_6	C10	P17813	ENG	ENG	1.79527	CM	6
C114_7	C114	P17813	ENG	ENG	1.30784	CM	7
C60_8	C60	P17813	ENG	ENG	1.74425	CM	8
C123_9	C123	P17813	ENG	ENG	1.54277	CM	9
C201_10	C201	P17813	ENG	ENG	1.9421	CM	10
C65_11	C65	P17813	ENG	ENG	1.64627	CM	11
C114_14	C114	P17813	ENG	ENG	1.58852	CM	14
C60_15	C60	P17813	ENG	ENG	1.63083	CM	15
C65_16	C65	P17813	ENG	ENG	1.8447	CM	16
C10_18	C10	P17813	ENG	ENG	1.53277	CM	18
C257_19	C257	P17813	ENG	ENG	1.79131	CM	19
C31_20	C31	P17813	ENG	ENG	2.03417	CM	20
C33_21	C33	P17813	ENG	ENG	1.58297	CM	21
C60_22	C60	P17813	ENG	ENG	1.65147	CM	22
C60_23	C60	P17813	ENG	ENG	1.41262	CM	23
C40_26	C40	P17813	ENG	ENG	1.79802	CM	26
C65_28	C65	P17813	ENG	ENG	1.82565	CM	28
C65_29	C65	P17813	ENG	ENG	1.57498	CM	29
C60_30	C60	P17813	ENG	ENG	1.81195	CM	30
C123_31	C123	P17813	ENG	ENG	1.71607	CM	31
C65_33	C65	P17813	ENG	ENG	1.69939	CM	33
C238_34	C238	P17813	ENG	ENG	1.87555	CM	34
C162_35	C162	P17813	ENG	ENG	1.48661	CM	35
C123_36	C123	P17813	ENG	ENG	1.4617	CM	36
C114_37	C114	P17813	ENG	ENG	0.96702	CM	37
C65_38	C65	P17813	ENG	ENG	1.75364	CM	38
C40_39	C40	P17813	ENG	ENG	1.32507	CM	39
C10_40	C10	P17813	ENG	ENG	1.09754	CM	40
C10_42	C10	P17813	ENG	ENG	1.2496	CM	42
C40_43	C40	P17813	ENG	ENG	1.70647	CM	43
C65_44	C65	P17813	ENG	ENG	1.63193	CM	44
C10_47	C10	P17813	ENG	ENG	1.3111	CM	47
C114_49	C114	P17813	ENG	ENG	1.72908	CM	49
C10_50	C10	P17813	ENG	ENG	1.74095	CM	50
C60_52	C60	P17813	ENG	ENG	1.95617	CM	52
C114_56	C114	P17813	ENG	ENG	1.72345	CM	56
C123_57	C123	P17813	ENG	ENG	1.86786	CM	57
C123_58	C123	P17813	ENG	ENG	1.76473	CM	58
C60_59	C60	P17813	ENG	ENG	1.80967	CM	59
C114_60	C114	P17813	ENG	ENG	1.36228	CM	60
C60_61	C60	P17813	ENG	ENG	1.74424	CM	61
C114_62	C114	P17813	ENG	ENG	1.90595	CM	62
C139_63	C139	P17813	ENG	ENG	1.81037	CM	63
C31_65	C31	P17813	ENG	ENG	2.10335	CM	65
C40_66	C40	P17813	ENG	ENG	2.03082	CM	66
C58_67	C58	P17813	ENG	ENG	1.57361	CM	67
C40_69	C40	P17813	ENG	ENG	1.62725	CM	69
C104_71	C104	P17813	ENG	ENG	1.78937	CM	71
C187_72	C187	P17813	ENG	ENG	1.719	CM	72
C31_73	C31	P17813	ENG	ENG	2.11921	CM	73
C65_74	C65	P17813	ENG	ENG	1.88788	CM	74
C65_75	C65	P17813	ENG	ENG	1.83075	CM	75
C31_78	C31	P17813	ENG	ENG	2.02642	CM	78
C31_79	C31	P17813	ENG	ENG	2.01505	CM	79
C40_80	C40	P17813	ENG	ENG	1.926	CM	80
C141_81	C141	P17813	ENG	ENG	1.35587	CM	81
C123_82	C123	P17813	ENG	ENG	1.71065	CM	82
C123_84	C123	P17813	ENG	ENG	2.13778	CM	84
C31_85	C31	P17813	ENG	ENG	1.87283	CM	85
C40_86	C40	P17813	ENG	ENG	1.83378	CM	86
C40_87	C40	P17813	ENG	ENG	1.87108	CM	87
C116_88	C116	P17813	ENG	ENG	2.04293	CM	88
C34_89	C34	P17813	ENG	ENG	1.66151	CM	89
C113_90	C113	P17813	ENG	ENG	2.06231	CM	90
C21_91	C21	P17813	ENG	ENG	1.83897	CM	91
C47_93	C47	P17813	ENG	ENG	1.95135	CM	93
C132_94	C132	P17813	ENG	ENG	1.87293	CM	94
C113_95	C113	P17813	ENG	ENG	2.29525	CM	95
C23_96	C23	P17813	ENG	ENG	1.75681	CM	96
C237_97	C237	P17813	ENG	ENG	1.6793	CM	97
C126_98	C126	P17813	ENG	ENG	1.43629	CM	98
C47_99	C47	P17813	ENG	ENG	1.54294	CM	99
C47_100	C47	P17813	ENG	ENG	1.39668	CM	100
C127_101	C127	P17813	ENG	ENG	1.87015	CM	101
C113_102	C113	P17813	ENG	ENG	1.65008	CM	102
C126_103	C126	P17813	ENG	ENG	1.72197	CM	103
C110_105	C110	P17813	ENG	ENG	1.70907	CM	105
C167_106	C167	P17813	ENG	ENG	2.12527	CM	106
C34_107	C34	P17813	ENG	ENG	1.64339	CM	107
C69_108	C69	P17813	ENG	ENG	1.11784	CM	108
C116_109	C116	P17813	ENG	ENG	2.06286	CM	109
C113_110	C113	P17813	ENG	ENG	1.99992	CM	110
C42_111	C42	P17813	ENG	ENG	1.74758	CM	111
C42_112	C42	P17813	ENG	ENG	1.78816	CM	112
C132_113	C132	P17813	ENG	ENG	1.61592	CM	113
C116_115	C116	P17813	ENG	ENG	2.3347	CM	115
C126_116	C126	P17813	ENG	ENG	1.74483	CM	116
C116_117	C116	P17813	ENG	ENG	1.92937	CM	117
C23_118	C23	P17813	ENG	ENG	1.72773	CM	118
C21_119	C21	P17813	ENG	ENG	1.44162	CM	119
C126_120	C126	P17813	ENG	ENG	1.65842	CM	120
C248_121	C248	P17813	ENG	ENG	1.78327	CM	121
C153_122	C153	P17813	ENG	ENG	2.08902	CM	122
C34_123	C34	P17813	ENG	ENG	1.46881	CM	123
C132_124	C132	P17813	ENG	ENG	1.23916	CM	124
C126_125	C126	P17813	ENG	ENG	1.52377	CM	125
C47_127	C47	P17813	ENG	ENG	1.60866	CM	127
C21_128	C21	P17813	ENG	ENG	2.1489	CM	128
C110_129	C110	P17813	ENG	ENG	1.69368	CM	129
C127_131	C127	P17813	ENG	ENG	1.93877	CM	131
C21_133	C21	P17813	ENG	ENG	1.89476	CM	133
C47_134	C47	P17813	ENG	ENG	1.79323	CM	134
C127_136	C127	P17813	ENG	ENG	1.79788	CM	136
C110_137	C110	P17813	ENG	ENG	1.7692	CM	137
C21_138	C21	P17813	ENG	ENG	2.10962	CM	138
C113_139	C113	P17813	ENG	ENG	2.08391	CM	139
C42_142	C42	P17813	ENG	ENG	1.44906	CM	142
C127_143	C127	P17813	ENG	ENG	1.74684	CM	143
C23_144	C23	P17813	ENG	ENG	2.00221	CM	144
C23_145	C23	P17813	ENG	ENG	1.90139	CM	145
C113_146	C113	P17813	ENG	ENG	2.02152	CM	146
C132_147	C132	P17813	ENG	ENG	1.6933	CM	147
C116_148	C116	P17813	ENG	ENG	2.24683	CM	148
C127_149	C127	P17813	ENG	ENG	1.8199	CM	149
C163_150	C163	P17813	ENG	ENG	1.84191	CM	150
C110_151	C110	P17813	ENG	ENG	1.65102	CM	151
C42_152	C42	P17813	ENG	ENG	1.27405	CM	152
C152_154	C152	P17813	ENG	ENG	1.74789	CM	154
C47_155	C47	P17813	ENG	ENG	1.46625	CM	155
C132_156	C132	P17813	ENG	ENG	1.26053	CM	156
C127_157	C127	P17813	ENG	ENG	1.70227	CM	157
C108_159	C108	P17813	ENG	ENG	1.45876	CM	159
C196_160	C196	P17813	ENG	ENG	2.17899	CM	160
C34_161	C34	P17813	ENG	ENG	1.99176	CM	161
C116_162	C116	P17813	ENG	ENG	2.00593	CM	162
C126_163	C126	P17813	ENG	ENG	1.71093	CM	163
C21_164	C21	P17813	ENG	ENG	1.8025	CM	164
C42_166	C42	P17813	ENG	ENG	1.77413	CM	166
C34_167	C34	P17813	ENG	ENG	1.76026	CM	167
C103_169	C103	P17813	ENG	ENG	2.05655	CM	169
C23_170	C23	P17813	ENG	ENG	2.06144	CM	170
C42_171	C42	P17813	ENG	ENG	1.88197	CM	171
C23_172	C23	P17813	ENG	ENG	1.98834	CM	172
C34_173	C34	P17813	ENG	ENG	1.68937	CM	173
C132_174	C132	P17813	ENG	ENG	1.77095	CM	174
C80_176	C80	P17813	ENG	ENG	1.91888	CM	176
C24_177	C24	P17813	ENG	ENG	2.00266	CM	177
C7_178	C7	P17813	ENG	ENG	1.93911	CM	178
C20_179	C20	P17813	ENG	ENG	1.84392	CM	179
C63_181	C63	P17813	ENG	ENG	1.41964	CM	181
C12_182	C12	P17813	ENG	ENG	1.28576	CM	182
C7_183	C7	P17813	ENG	ENG	2.09958	CM	183
C22_184	C22	P17813	ENG	ENG	2.10097	CM	184
C166_185	C166	P17813	ENG	ENG	1.58273	CM	185
C9_186	C9	P17813	ENG	ENG	1.60778	CM	186
C50_187	C50	P17813	ENG	ENG	1.9459	CM	187
C32_188	C32	P17813	ENG	ENG	1.87239	CM	188
C11_189	C11	P17813	ENG	ENG	1.58844	CM	189
C7_190	C7	P17813	ENG	ENG	2.16008	CM	190
C9_191	C9	P17813	ENG	ENG	1.45014	CM	191
C63_193	C63	P17813	ENG	ENG	1.81295	CM	193
C169_194	C169	P17813	ENG	ENG	1.77815	CM	194
C24_195	C24	P17813	ENG	ENG	2.04857	CM	195
C29_196	C29	P17813	ENG	ENG	1.48948	CM	196
C80_197	C80	P17813	ENG	ENG	1.90141	CM	197
C7_198	C7	P17813	ENG	ENG	1.83398	CM	198
C50_199	C50	P17813	ENG	ENG	1.33791	CM	199
C27_200	C27	P17813	ENG	ENG	1.52156	CM	200
C128_201	C128	P17813	ENG	ENG	1.94846	CM	201
C80_203	C80	P17813	ENG	ENG	2.13123	CM	203
C9_204	C9	P17813	ENG	ENG	1.34034	CM	204
C80_205	C80	P17813	ENG	ENG	2.0182	CM	205
C22_206	C22	P17813	ENG	ENG	1.98213	CM	206
C20_207	C20	P17813	ENG	ENG	1.6119	CM	207
C9_208	C9	P17813	ENG	ENG	1.52989	CM	208
C89_209	C89	P17813	ENG	ENG	1.89368	CM	209
C212_210	C212	P17813	ENG	ENG	1.39568	CM	210
C24_211	C24	P17813	ENG	ENG	1.31368	CM	211
C12_212	C12	P17813	ENG	ENG	1.22477	CM	212
C9_213	C9	P17813	ENG	ENG	1.90218	CM	213
C63_215	C63	P17813	ENG	ENG	2.00832	CM	215
C63_217	C63	P17813	ENG	ENG	1.55262	CM	217
C128_218	C128	P17813	ENG	ENG	1.53671	CM	218
C11_219	C11	P17813	ENG	ENG	1.14238	CM	219
C63_222	C63	P17813	ENG	ENG	1.89514	CM	222
C12_224	C12	P17813	ENG	ENG	1.61292	CM	224
C37_225	C37	P17813	ENG	ENG	1.37132	CM	225
C20_226	C20	P17813	ENG	ENG	1.62576	CM	226
C7_227	C7	P17813	ENG	ENG	1.90668	CM	227
C50_230	C50	P17813	ENG	ENG	0.92904	CM	230
C11_231	C11	P17813	ENG	ENG	1.55047	CM	231
C22_232	C22	P17813	ENG	ENG	1.88043	CM	232
C22_233	C22	P17813	ENG	ENG	1.90856	CM	233
C7_234	C7	P17813	ENG	ENG	2.1615	CM	234
C12_235	C12	P17813	ENG	ENG	1.58901	CM	235
C80_236	C80	P17813	ENG	ENG	2.09043	CM	236
C11_237	C11	P17813	ENG	ENG	1.83605	CM	237
C142_238	C142	P17813	ENG	ENG	1.28336	CM	238
C37_239	C37	P17813	ENG	ENG	1.49924	CM	239
C27_240	C27	P17813	ENG	ENG	0.99052	CM	240
C128_241	C128	P17813	ENG	ENG	1.42173	CM	241
C193_242	C193	P17813	ENG	ENG	1.32203	CM	242
C50_243	C50	P17813	ENG	ENG	2.0196	CM	243
C128_244	C128	P17813	ENG	ENG	1.62123	CM	244
C11_245	C11	P17813	ENG	ENG	1.18623	CM	245
C134_247	C134	P17813	ENG	ENG	1.75751	CM	247
C240_248	C240	P17813	ENG	ENG	2.12044	CM	248
C27_249	C27	P17813	ENG	ENG	1.57606	CM	249
C80_250	C80	P17813	ENG	ENG	2.31034	CM	250
C9_251	C9	P17813	ENG	ENG	1.6127	CM	251
C20_252	C20	P17813	ENG	ENG	1.59705	CM	252
C27_254	C27	P17813	ENG	ENG	1.77195	CM	254
C32_255	C32	P17813	ENG	ENG	1.85317	CM	255
C128_256	C128	P17813	ENG	ENG	1.78433	CM	256
C234_257	C234	P17813	ENG	ENG	1.99528	CM	257
C20_258	C20	P17813	ENG	ENG	1.69802	CM	258
C27_259	C27	P17813	ENG	ENG	1.74269	CM	259
C22_260	C22	P17813	ENG	ENG	1.84189	CM	260
C24_261	C24	P17813	ENG	ENG	2.10201	CM	261
C12_262	C12	P17813	ENG	ENG	1.4142	CM	262
C87_264	C87	P17813	ENG	ENG	1.50936	CM	264
C59_267	C59	P17813	ENG	ENG	1.88068	CM	267
C25_268	C25	P17813	ENG	ENG	1.58536	CM	268
C48_269	C48	P17813	ENG	ENG	2.08985	CM	269
C129_270	C129	P17813	ENG	ENG	1.70282	CM	270
C87_271	C87	P17813	ENG	ENG	1.88908	CM	271
C73_272	C73	P17813	ENG	ENG	1.55403	CM	272
C242_273	C242	P17813	ENG	ENG	1.82748	CM	273
C93_274	C93	P17813	ENG	ENG	1.8344	CM	274
C82_275	C82	P17813	ENG	ENG	1.46931	CM	275
C82_276	C82	P17813	ENG	ENG	1.55787	CM	276
C125_277	C125	P17813	ENG	ENG	1.97564	CM	277
C68_278	C68	P17813	ENG	ENG	2.50584	CM	278
C124_279	C124	P17813	ENG	ENG	1.96265	CM	279
C105_280	C105	P17813	ENG	ENG	1.66997	CM	280
C66_281	C66	P17813	ENG	ENG	1.87906	CM	281
C214_282	C214	P17813	ENG	ENG	1.92309	CM	282
C99_283	C99	P17813	ENG	ENG	2.41135	CM	283
C251_284	C251	P17813	ENG	ENG	2.08492	CM	284
C87_285	C87	P17813	ENG	ENG	1.81612	CM	285
C68_286	C68	P17813	ENG	ENG	2.27004	CM	286
C36_287	C36	P17813	ENG	ENG	1.48776	CM	287
C36_288	C36	P17813	ENG	ENG	1.37489	CM	288
C105_290	C105	P17813	ENG	ENG	1.55246	CM	290
C93_291	C93	P17813	ENG	ENG	2.05388	CM	291
C124_292	C124	P17813	ENG	ENG	2.25886	CM	292
C87_293	C87	P17813	ENG	ENG	2.14052	CM	293
C73_294	C73	P17813	ENG	ENG	1.96408	CM	294
C59_295	C59	P17813	ENG	ENG	1.71296	CM	295
C124_296	C124	P17813	ENG	ENG	1.63737	CM	296
C64_297	C64	P17813	ENG	ENG	1.98818	CM	297
C137_298	C137	P17813	ENG	ENG	1.59823	CM	298
C99_299	C99	P17813	ENG	ENG	2.04688	CM	299
C129_300	C129	P17813	ENG	ENG	1.74255	CM	300
C93_301	C93	P17813	ENG	ENG	1.85635	CM	301
C18_302	C18	P17813	ENG	ENG	1.95857	CM	302
C48_303	C48	P17813	ENG	ENG	1.46365	CM	303
C25_304	C25	P17813	ENG	ENG	1.71761	CM	304
C49_305	C49	P17813	ENG	ENG	1.85337	CM	305
C124_307	C124	P17813	ENG	ENG	2.11716	CM	307
C25_309	C25	P17813	ENG	ENG	1.55898	CM	309
C49_310	C49	P17813	ENG	ENG	1.95436	CM	310
C129_312	C129	P17813	ENG	ENG	1.82522	CM	312
C66_313	C66	P17813	ENG	ENG	1.63272	CM	313
C59_314	C59	P17813	ENG	ENG	1.71114	CM	314
C68_315	C68	P17813	ENG	ENG	2.35118	CM	315
C105_316	C105	P17813	ENG	ENG	1.3724	CM	316
C105_317	C105	P17813	ENG	ENG	1.59923	CM	317
C36_318	C36	P17813	ENG	ENG	1.42262	CM	318
C125_319	C125	P17813	ENG	ENG	2.07505	CM	319
C73_320	C73	P17813	ENG	ENG	1.72602	CM	320
C99_321	C99	P17813	ENG	ENG	2.10676	CM	321
C68_322	C68	P17813	ENG	ENG	2.29258	CM	322
C129_323	C129	P17813	ENG	ENG	1.91181	CM	323
C87_324	C87	P17813	ENG	ENG	1.87774	CM	324
C125_325	C125	P17813	ENG	ENG	2.03745	CM	325
C195_326	C195	P17813	ENG	ENG	2.12347	CM	326
C105_327	C105	P17813	ENG	ENG	1.50432	CM	327
C17_328	C17	P17813	ENG	ENG	1.63998	CM	328
C18_329	C18	P17813	ENG	ENG	1.65246	CM	329
C164_330	C164	P17813	ENG	ENG	2.02045	CM	330
C82_331	C82	P17813	ENG	ENG	1.52598	CM	331
C125_333	C125	P17813	ENG	ENG	2.11978	CM	333
C105_334	C105	P17813	ENG	ENG	1.53695	CM	334
C130_335	C130	P17813	ENG	ENG	2.20989	CM	335
C180_336	C180	P17813	ENG	ENG	1.66396	CM	336
C149_337	C149	P17813	ENG	ENG	2.01272	CM	337
C93_338	C93	P17813	ENG	ENG	1.51916	CM	338
C93_339	C93	P17813	ENG	ENG	1.75869	CM	339
C25_340	C25	P17813	ENG	ENG	1.77078	CM	340
C17_342	C17	P17813	ENG	ENG	1.44021	CM	342
C105_343	C105	P17813	ENG	ENG	1.50217	CM	343
C18_344	C18	P17813	ENG	ENG	1.61414	CM	344
C189_345	C189	P17813	ENG	ENG	1.82495	CM	345
C59_346	C59	P17813	ENG	ENG	2.07085	CM	346
C17_347	C17	P17813	ENG	ENG	1.52335	CM	347
C73_348	C73	P17813	ENG	ENG	1.56585	CM	348
C99_349	C99	P17813	ENG	ENG	2.35725	CM	349
C18_351	C18	P17813	ENG	ENG	1.59312	CM	351
C246_352	C246	P17813	ENG	ENG	2.02609	CM	352
C84_353	C84	P17813	ENG	ENG	1.88227	CM	353
C241_354	C241	P17813	ENG	ENG	2.07008	CM	354
C67_355	C67	P17813	ENG	ENG	1.6182	CM	355
C106_360	C106	P17813	ENG	ENG	1.46896	CM	360
C224_361	C224	P17813	ENG	ENG	2.11942	CM	361
C77_363	C77	P17813	ENG	ENG	1.74049	CM	363
C161_364	C161	P17813	ENG	ENG	1.72098	CM	364
C85_365	C85	P17813	ENG	ENG	1.81611	CM	365
C197_366	C197	P17813	ENG	ENG	2.08217	CM	366
C173_367	C173	P17813	ENG	ENG	2.02805	CM	367
C245_368	C245	P17813	ENG	ENG	1.35841	CM	368
C57_371	C57	P17813	ENG	ENG	1.90714	CM	371
C70_372	C70	P17813	ENG	ENG	2.16187	CM	372
C77_374	C77	P17813	ENG	ENG	1.85075	CM	374
C60_1	C60	P55058	PLTP	PLTP	2.46027	CM	1
C31_2	C31	P55058	PLTP	PLTP	2.2957	CM	2
C60_3	C60	P55058	PLTP	PLTP	2.1993	CM	3
C10_6	C10	P55058	PLTP	PLTP	2.11854	CM	6
C114_7	C114	P55058	PLTP	PLTP	2.15908	CM	7
C60_8	C60	P55058	PLTP	PLTP	2.29076	CM	8
C123_9	C123	P55058	PLTP	PLTP	2.34594	CM	9
C201_10	C201	P55058	PLTP	PLTP	2.43639	CM	10
C65_11	C65	P55058	PLTP	PLTP	1.77726	CM	11
C114_14	C114	P55058	PLTP	PLTP	1.74981	CM	14
C60_15	C60	P55058	PLTP	PLTP	2.09476	CM	15
C65_16	C65	P55058	PLTP	PLTP	1.87556	CM	16
C10_18	C10	P55058	PLTP	PLTP	1.6512	CM	18
C257_19	C257	P55058	PLTP	PLTP	2.31285	CM	19
C31_20	C31	P55058	PLTP	PLTP	2.0797	CM	20
C33_21	C33	P55058	PLTP	PLTP	2.30704	CM	21
C60_22	C60	P55058	PLTP	PLTP	2.08455	CM	22
C60_23	C60	P55058	PLTP	PLTP	2.30121	CM	23
C40_26	C40	P55058	PLTP	PLTP	1.72848	CM	26
C65_28	C65	P55058	PLTP	PLTP	1.97053	CM	28
C65_29	C65	P55058	PLTP	PLTP	1.60079	CM	29
C60_30	C60	P55058	PLTP	PLTP	2.13863	CM	30
C123_31	C123	P55058	PLTP	PLTP	2.28776	CM	31
C65_33	C65	P55058	PLTP	PLTP	1.66052	CM	33
C238_34	C238	P55058	PLTP	PLTP	2.52508	CM	34
C162_35	C162	P55058	PLTP	PLTP	1.73515	CM	35
C123_36	C123	P55058	PLTP	PLTP	2.78321	CM	36
C114_37	C114	P55058	PLTP	PLTP	1.80366	CM	37
C65_38	C65	P55058	PLTP	PLTP	1.49854	CM	38
C40_39	C40	P55058	PLTP	PLTP	1.67512	CM	39
C10_40	C10	P55058	PLTP	PLTP	1.61197	CM	40
C10_42	C10	P55058	PLTP	PLTP	1.65457	CM	42
C40_43	C40	P55058	PLTP	PLTP	2.03743	CM	43
C65_44	C65	P55058	PLTP	PLTP	1.78061	CM	44
C10_47	C10	P55058	PLTP	PLTP	1.46504	CM	47
C114_49	C114	P55058	PLTP	PLTP	1.80263	CM	49
C10_50	C10	P55058	PLTP	PLTP	1.89667	CM	50
C60_52	C60	P55058	PLTP	PLTP	2.23657	CM	52
C114_56	C114	P55058	PLTP	PLTP	2.16314	CM	56
C123_57	C123	P55058	PLTP	PLTP	2.49397	CM	57
C123_58	C123	P55058	PLTP	PLTP	2.4039	CM	58
C60_59	C60	P55058	PLTP	PLTP	2.2673	CM	59
C114_60	C114	P55058	PLTP	PLTP	2.13431	CM	60
C60_61	C60	P55058	PLTP	PLTP	2.12855	CM	61
C114_62	C114	P55058	PLTP	PLTP	1.84151	CM	62
C139_63	C139	P55058	PLTP	PLTP	2.23638	CM	63
C31_65	C31	P55058	PLTP	PLTP	2.40187	CM	65
C40_66	C40	P55058	PLTP	PLTP	1.96988	CM	66
C58_67	C58	P55058	PLTP	PLTP	2.07708	CM	67
C40_69	C40	P55058	PLTP	PLTP	1.87898	CM	69
C104_71	C104	P55058	PLTP	PLTP	2.56059	CM	71
C187_72	C187	P55058	PLTP	PLTP	1.83152	CM	72
C31_73	C31	P55058	PLTP	PLTP	2.27067	CM	73
C65_74	C65	P55058	PLTP	PLTP	1.93645	CM	74
C65_75	C65	P55058	PLTP	PLTP	2.24488	CM	75
C31_78	C31	P55058	PLTP	PLTP	2.45301	CM	78
C31_79	C31	P55058	PLTP	PLTP	2.25177	CM	79
C40_80	C40	P55058	PLTP	PLTP	2.21241	CM	80
C141_81	C141	P55058	PLTP	PLTP	2.35579	CM	81
C123_82	C123	P55058	PLTP	PLTP	2.55697	CM	82
C123_84	C123	P55058	PLTP	PLTP	2.6214	CM	84
C31_85	C31	P55058	PLTP	PLTP	2.15706	CM	85
C40_86	C40	P55058	PLTP	PLTP	2.57379	CM	86
C40_87	C40	P55058	PLTP	PLTP	2.35992	CM	87
C116_88	C116	P55058	PLTP	PLTP	2.14805	CM	88
C34_89	C34	P55058	PLTP	PLTP	2.53899	CM	89
C113_90	C113	P55058	PLTP	PLTP	2.44178	CM	90
C21_91	C21	P55058	PLTP	PLTP	2.02327	CM	91
C47_93	C47	P55058	PLTP	PLTP	2.47516	CM	93
C132_94	C132	P55058	PLTP	PLTP	2.57872	CM	94
C113_95	C113	P55058	PLTP	PLTP	2.80928	CM	95
C23_96	C23	P55058	PLTP	PLTP	2.07847	CM	96
C237_97	C237	P55058	PLTP	PLTP	2.03667	CM	97
C126_98	C126	P55058	PLTP	PLTP	2.46844	CM	98
C47_99	C47	P55058	PLTP	PLTP	2.02354	CM	99
C47_100	C47	P55058	PLTP	PLTP	1.6975	CM	100
C127_101	C127	P55058	PLTP	PLTP	1.58116	CM	101
C113_102	C113	P55058	PLTP	PLTP	2.10515	CM	102
C126_103	C126	P55058	PLTP	PLTP	2.82208	CM	103
C110_105	C110	P55058	PLTP	PLTP	2.03129	CM	105
C167_106	C167	P55058	PLTP	PLTP	2.20858	CM	106
C34_107	C34	P55058	PLTP	PLTP	2.60105	CM	107
C69_108	C69	P55058	PLTP	PLTP	1.91056	CM	108
C116_109	C116	P55058	PLTP	PLTP	1.99505	CM	109
C113_110	C113	P55058	PLTP	PLTP	2.30521	CM	110
C42_111	C42	P55058	PLTP	PLTP	2.53546	CM	111
C42_112	C42	P55058	PLTP	PLTP	2.18284	CM	112
C132_113	C132	P55058	PLTP	PLTP	2.07513	CM	113
C116_115	C116	P55058	PLTP	PLTP	2.5887	CM	115
C126_116	C126	P55058	PLTP	PLTP	2.5623	CM	116
C116_117	C116	P55058	PLTP	PLTP	1.96763	CM	117
C23_118	C23	P55058	PLTP	PLTP	1.70012	CM	118
C21_119	C21	P55058	PLTP	PLTP	1.56845	CM	119
C126_120	C126	P55058	PLTP	PLTP	2.46508	CM	120
C248_121	C248	P55058	PLTP	PLTP	2.06621	CM	121
C153_122	C153	P55058	PLTP	PLTP	2.48123	CM	122
C34_123	C34	P55058	PLTP	PLTP	2.32454	CM	123
C132_124	C132	P55058	PLTP	PLTP	2.01679	CM	124
C126_125	C126	P55058	PLTP	PLTP	2.77918	CM	125
C47_127	C47	P55058	PLTP	PLTP	1.96018	CM	127
C21_128	C21	P55058	PLTP	PLTP	2.22466	CM	128
C110_129	C110	P55058	PLTP	PLTP	2.13222	CM	129
C127_131	C127	P55058	PLTP	PLTP	1.47747	CM	131
C21_133	C21	P55058	PLTP	PLTP	1.88295	CM	133
C47_134	C47	P55058	PLTP	PLTP	1.70465	CM	134
C127_136	C127	P55058	PLTP	PLTP	2.01076	CM	136
C110_137	C110	P55058	PLTP	PLTP	2.47944	CM	137
C21_138	C21	P55058	PLTP	PLTP	2.44471	CM	138
C113_139	C113	P55058	PLTP	PLTP	2.30133	CM	139
C42_142	C42	P55058	PLTP	PLTP	2.17823	CM	142
C127_143	C127	P55058	PLTP	PLTP	1.80111	CM	143
C23_144	C23	P55058	PLTP	PLTP	1.85143	CM	144
C23_145	C23	P55058	PLTP	PLTP	1.9363	CM	145
C113_146	C113	P55058	PLTP	PLTP	2.38526	CM	146
C132_147	C132	P55058	PLTP	PLTP	2.03141	CM	147
C116_148	C116	P55058	PLTP	PLTP	2.22585	CM	148
C127_149	C127	P55058	PLTP	PLTP	2.07611	CM	149
C163_150	C163	P55058	PLTP	PLTP	2.40044	CM	150
C110_151	C110	P55058	PLTP	PLTP	1.99527	CM	151
C42_152	C42	P55058	PLTP	PLTP	2.33401	CM	152
C152_154	C152	P55058	PLTP	PLTP	1.97083	CM	154
C47_155	C47	P55058	PLTP	PLTP	1.57284	CM	155
C132_156	C132	P55058	PLTP	PLTP	1.72292	CM	156
C127_157	C127	P55058	PLTP	PLTP	1.57056	CM	157
C108_159	C108	P55058	PLTP	PLTP	2.37402	CM	159
C196_160	C196	P55058	PLTP	PLTP	2.3024	CM	160
C34_161	C34	P55058	PLTP	PLTP	2.79303	CM	161
C116_162	C116	P55058	PLTP	PLTP	2.26294	CM	162
C126_163	C126	P55058	PLTP	PLTP	2.59821	CM	163
C21_164	C21	P55058	PLTP	PLTP	1.79386	CM	164
C42_166	C42	P55058	PLTP	PLTP	2.50313	CM	166
C34_167	C34	P55058	PLTP	PLTP	2.53938	CM	167
C103_169	C103	P55058	PLTP	PLTP	2.48127	CM	169
C23_170	C23	P55058	PLTP	PLTP	2.61887	CM	170
C42_171	C42	P55058	PLTP	PLTP	2.61896	CM	171
C23_172	C23	P55058	PLTP	PLTP	2.31888	CM	172
C34_173	C34	P55058	PLTP	PLTP	2.76918	CM	173
C132_174	C132	P55058	PLTP	PLTP	2.48917	CM	174
C80_176	C80	P55058	PLTP	PLTP	1.93635	CM	176
C24_177	C24	P55058	PLTP	PLTP	2.45301	CM	177
C7_178	C7	P55058	PLTP	PLTP	2.58589	CM	178
C20_179	C20	P55058	PLTP	PLTP	2.18476	CM	179
C63_181	C63	P55058	PLTP	PLTP	2.04183	CM	181
C12_182	C12	P55058	PLTP	PLTP	2.60144	CM	182
C7_183	C7	P55058	PLTP	PLTP	2.57256	CM	183
C22_184	C22	P55058	PLTP	PLTP	2.17158	CM	184
C166_185	C166	P55058	PLTP	PLTP	2.41102	CM	185
C9_186	C9	P55058	PLTP	PLTP	2.15021	CM	186
C50_187	C50	P55058	PLTP	PLTP	3.16569	CM	187
C32_188	C32	P55058	PLTP	PLTP	1.74384	CM	188
C11_189	C11	P55058	PLTP	PLTP	1.645	CM	189
C7_190	C7	P55058	PLTP	PLTP	2.26384	CM	190
C9_191	C9	P55058	PLTP	PLTP	2.59862	CM	191
C63_193	C63	P55058	PLTP	PLTP	2.40915	CM	193
C169_194	C169	P55058	PLTP	PLTP	2.2621	CM	194
C24_195	C24	P55058	PLTP	PLTP	2.39122	CM	195
C29_196	C29	P55058	PLTP	PLTP	1.96421	CM	196
[truncated: 131,578 more rows]
