# Supplementary material for: Longitudinal proteomic profiling of dialysis patients with COVID-19 reveals markers of severity and predictors of death
Source: eLife journal article supplement (doi:10.7554/elife.64827), 2021-03-11
Supplement: supp [file elife-64827-supp-v1.zip › elife_poa_e64827_Source_data_2.csv]

SampleID	Individual_ID	Plate_ID	Case_Control	WHO_Severity_Peak	WHO_Severity_Contemporaneous	Sex	Ethnicity	Age	Ever_Admitted	Fatal_Disease	Time_From_First_Symptoms	Time_Of_Death_From_First_Symptoms	Time_From_First_Swab	Time_Of_Death_From_First_Swab	WCC	Neutrophil	Monocyte	Lymphocyte	CRP	DDimer	Ferritin	Troponin
C60_1	C60	plate.1	POSITIVE	severe	moderate	M	White	(80,100]	TRUE	FALSE	37	NA	35	NA	5.8	3.3	0.4	1.7	21.4	NA	NA	23
C31_2	C31	plate.1	POSITIVE	mild	mild	F	Black	(20,40]	FALSE	FALSE	8	NA	4	NA	NA	NA	NA	NA	NA	NA	NA	NA
C60_3	C60	plate.1	POSITIVE	severe	moderate	M	White	(80,100]	TRUE	FALSE	9	NA	7	NA	NA	NA	NA	NA	NA	NA	NA	NA
C10_6	C10	plate.1	POSITIVE	severe	moderate	F	Black	(80,100]	TRUE	FALSE	13	NA	13	NA	NA	NA	NA	NA	NA	NA	NA	NA
C114_7	C114	plate.1	POSITIVE	severe	mild	M	South Asian	(60,80]	TRUE	FALSE	31	NA	30	NA	9.9	6.7	0.8	1.8	48.1	NA	NA	31
C60_8	C60	plate.1	POSITIVE	severe	severe	M	White	(80,100]	TRUE	FALSE	16	NA	14	NA	3.8	3.3	0.1	0.4	239.7	NA	NA	NA
C123_9	C123	plate.1	POSITIVE	severe	severe	M	South Asian	(60,80]	TRUE	FALSE	14	NA	11	NA	10.3	9.4	0.6	0.3	100.5	6523	6942	47
C201_10	C201	plate.1	NEGATIVE	NEGATIVE	NEGATIVE	M	Black	(40,60]	FALSE	FALSE	NA	NA	NA	NA	NA	NA	NA	NA	NA	NA	NA	NA
C65_11	C65	plate.1	POSITIVE	critical	critical	M	White	(60,80]	TRUE	FALSE	15	NA	10	NA	7	5.9	0.2	0.8	182.4	NA	2597	137
C114_14	C114	plate.1	POSITIVE	severe	moderate	M	South Asian	(60,80]	TRUE	FALSE	11	NA	10	NA	11.3	10.1	0.8	0.8	67.2	2611	292	81
C60_15	C60	plate.1	POSITIVE	severe	moderate	M	White	(80,100]	TRUE	FALSE	6	NA	4	NA	NA	NA	NA	NA	NA	NA	NA	NA
C65_16	C65	plate.1	POSITIVE	critical	severe	M	White	(60,80]	TRUE	FALSE	36	NA	31	NA	7	5.1	0.3	0.8	93.7	2256	1351	175
C10_18	C10	plate.1	POSITIVE	severe	moderate	F	Black	(80,100]	TRUE	FALSE	21	NA	21	NA	11.9	9.5	1.6	0.7	216.3	NA	NA	NA
C257_19	C257	plate.1	NEGATIVE	NEGATIVE	NEGATIVE	F	South Asian	(60,80]	FALSE	FALSE	NA	NA	NA	NA	NA	NA	NA	NA	NA	NA	NA	NA
C31_20	C31	plate.1	POSITIVE	mild	mild	F	Black	(20,40]	FALSE	FALSE	6	NA	2	NA	3.8	2.6	0.6	0.8	1.2	3760	642	6
C33_21	C33	plate.1	NEGATIVE	NEGATIVE	NEGATIVE	M	South Asian	(60,80]	FALSE	FALSE	NA	NA	NA	NA	NA	NA	NA	NA	NA	NA	NA	NA
C60_22	C60	plate.1	POSITIVE	severe	moderate	M	White	(80,100]	TRUE	FALSE	33	NA	31	NA	4.8	2.8	0.3	1.5	24.3	NA	NA	NA
C60_23	C60	plate.1	POSITIVE	severe	moderate	M	White	(80,100]	TRUE	FALSE	11	NA	9	NA	3.3	2.4	0.2	0.7	135.2	NA	3718	80
C40_26	C40	plate.1	POSITIVE	critical	moderate	M	Black	(40,60]	TRUE	FALSE	9	NA	9	NA	7.8	6.1	0.5	1	112.9	NA	3136	29
C65_28	C65	plate.1	POSITIVE	critical	moderate	M	White	(60,80]	TRUE	FALSE	9	NA	4	NA	6	5	0.3	0.7	78.7	1772	2692	146
C65_29	C65	plate.1	POSITIVE	critical	critical	M	White	(60,80]	TRUE	FALSE	27	NA	22	NA	9	7.4	0.6	1	176.3	6629	3172	419
C60_30	C60	plate.1	POSITIVE	severe	moderate	M	White	(80,100]	TRUE	FALSE	17	NA	15	NA	3.6	3	0.1	0.4	260.5	NA	NA	NA
C123_31	C123	plate.1	POSITIVE	severe	severe	M	South Asian	(60,80]	TRUE	FALSE	12	NA	9	NA	7.6	6.4	0.5	0.5	87.9	3860	1578	47
C65_33	C65	plate.1	POSITIVE	critical	critical	M	White	(60,80]	TRUE	FALSE	23	NA	18	NA	7.8	6.6	0.6	0.6	150.8	3489	1804	65
C238_34	C238	plate.1	NEGATIVE	NEGATIVE	NEGATIVE	F	Black	(20,40]	FALSE	FALSE	NA	NA	NA	NA	NA	NA	NA	NA	NA	NA	NA	NA
C162_35	C162	plate.1	NEGATIVE	NEGATIVE	NEGATIVE	M	White	(60,80]	FALSE	FALSE	NA	NA	NA	NA	NA	NA	NA	NA	NA	NA	NA	NA
C123_36	C123	plate.1	POSITIVE	severe	mild	M	South Asian	(60,80]	TRUE	FALSE	35	NA	32	NA	8.8	7	0.6	1.1	2.8	NA	NA	NA
C114_37	C114	plate.1	POSITIVE	severe	mild	M	South Asian	(60,80]	TRUE	FALSE	27	NA	26	NA	12.4	9	1.2	1.7	66.4	NA	NA	NA
C65_38	C65	plate.1	POSITIVE	critical	critical	M	White	(60,80]	TRUE	FALSE	17	NA	12	NA	6.9	6.1	0.2	0.6	158.1	NA	2355	94
C40_39	C40	plate.1	POSITIVE	critical	mild	M	Black	(40,60]	TRUE	FALSE	31	NA	31	NA	8.7	5.8	1	1.5	38.2	NA	490	NA
C10_40	C10	plate.1	POSITIVE	severe	severe	F	Black	(80,100]	TRUE	FALSE	12	NA	12	NA	9.3	8	0.6	0.6	354.1	NA	2302	NA
C10_42	C10	plate.1	POSITIVE	severe	moderate	F	Black	(80,100]	TRUE	FALSE	18	NA	18	NA	11.7	9.3	1.7	0.5	279.7	NA	NA	NA
C40_43	C40	plate.1	POSITIVE	critical	moderate	M	Black	(40,60]	TRUE	FALSE	11	NA	11	NA	3.8	2.4	0.1	1.2	52.9	NA	2965	22
C65_44	C65	plate.1	POSITIVE	critical	severe	M	White	(60,80]	TRUE	FALSE	41	NA	36	NA	6.6	5.2	0.4	1	35.5	NA	1142	NA
C10_47	C10	plate.1	POSITIVE	severe	moderate	F	Black	(80,100]	TRUE	FALSE	16	NA	16	NA	11.5	9.2	1.5	0.6	280.9	NA	NA	NA
C114_49	C114	plate.1	POSITIVE	severe	moderate	M	South Asian	(60,80]	TRUE	FALSE	16	NA	15	NA	11.9	8.7	1.2	1.5	56.6	NA	NA	NA
C10_50	C10	plate.1	POSITIVE	severe	mild	F	Black	(80,100]	TRUE	FALSE	30	NA	30	NA	15.6	12.4	1.8	1.2	73.3	NA	NA	NA
C60_52	C60	plate.1	POSITIVE	severe	moderate	M	White	(80,100]	TRUE	FALSE	4	NA	2	NA	3.8	2.5	0.2	0.9	16.8	1005	1936	35
C114_56	C114	plate.1	POSITIVE	severe	moderate	M	South Asian	(60,80]	TRUE	FALSE	5	NA	4	NA	4.6	3.3	0.3	1.2	102.5	NA	NA	NA
C123_57	C123	plate.1	POSITIVE	severe	severe	M	South Asian	(60,80]	TRUE	FALSE	10	NA	7	NA	7.9	6.1	0.5	1.2	44	NA	2179	NA
C123_58	C123	plate.1	POSITIVE	severe	moderate	M	South Asian	(60,80]	TRUE	FALSE	25	NA	22	NA	9.5	6.6	1.1	1.6	9.2	1140	1092	32
C60_59	C60	plate.1	POSITIVE	severe	moderate	M	White	(80,100]	TRUE	FALSE	13	NA	11	NA	2.5	1.7	0.1	0.7	NA	NA	NA	94
C114_60	C114	plate.1	POSITIVE	severe	mild	M	South Asian	(60,80]	TRUE	FALSE	24	NA	23	NA	15.4	13.5	1	0.9	76.3	2262	304	11
C60_61	C60	plate.1	POSITIVE	severe	moderate	M	White	(80,100]	TRUE	FALSE	29	NA	27	NA	2.7	1.6	0.2	0.8	48.4	NA	NA	NA
C114_62	C114	plate.1	POSITIVE	severe	severe	M	South Asian	(60,80]	TRUE	FALSE	9	NA	8	NA	8	6	0.8	1.2	76.6	NA	NA	NA
C139_63	C139	plate.1	NEGATIVE	NEGATIVE	NEGATIVE	M	White	(80,100]	FALSE	FALSE	NA	NA	NA	NA	NA	NA	NA	NA	NA	NA	NA	NA
C31_65	C31	plate.1	POSITIVE	mild	mild	F	Black	(20,40]	FALSE	FALSE	15	NA	11	NA	NA	NA	NA	NA	NA	NA	NA	NA
C40_66	C40	plate.1	POSITIVE	critical	moderate	M	Black	(40,60]	TRUE	FALSE	14	NA	14	NA	11.5	8.8	0.8	1.8	20.1	11683	10398	33
C58_67	C58	plate.1	NEGATIVE	NEGATIVE	NEGATIVE	F	White	(60,80]	FALSE	FALSE	NA	NA	NA	NA	NA	NA	NA	NA	NA	NA	NA	NA
C40_69	C40	plate.1	POSITIVE	critical	moderate	M	Black	(40,60]	TRUE	FALSE	4	NA	4	NA	10.2	7.5	1.2	1.4	NA	9668	1299	74
C104_71	C104	plate.1	NEGATIVE	NEGATIVE	NEGATIVE	M	Other	(80,100]	FALSE	FALSE	NA	NA	NA	NA	NA	NA	NA	NA	NA	NA	NA	NA
C187_72	C187	plate.1	NEGATIVE	NEGATIVE	NEGATIVE	M	Other	(60,80]	FALSE	FALSE	NA	NA	NA	NA	NA	NA	NA	NA	NA	NA	NA	NA
C31_73	C31	plate.1	POSITIVE	mild	mild	F	Black	(20,40]	FALSE	FALSE	13	NA	9	NA	5.5	3.9	0.5	1	4.3	306	38	NA
C65_74	C65	plate.1	POSITIVE	critical	severe	M	White	(60,80]	TRUE	FALSE	13	NA	8	NA	5.8	4.6	0.2	0.8	178.2	1302	3643	212
C65_75	C65	plate.1	POSITIVE	critical	severe	M	White	(60,80]	TRUE	FALSE	20	NA	15	NA	8.1	6.7	0.8	0.6	124.8	2279	1916	76
C31_78	C31	plate.1	POSITIVE	mild	mild	F	Black	(20,40]	FALSE	FALSE	18	NA	14	NA	6.9	5.5	0.6	0.8	1.2	NA	359	NA
C31_79	C31	plate.1	POSITIVE	mild	mild	F	Black	(20,40]	FALSE	FALSE	11	NA	7	NA	NA	NA	NA	NA	NA	NA	NA	NA
C40_80	C40	plate.1	POSITIVE	critical	critical	M	Black	(40,60]	TRUE	FALSE	18	NA	18	NA	12.6	8.8	1.6	1.8	92.5	3524	3440	37
C141_81	C141	plate.1	NEGATIVE	NEGATIVE	NEGATIVE	M	Black	(80,100]	FALSE	FALSE	NA	NA	NA	NA	NA	NA	NA	NA	NA	NA	NA	NA
C123_82	C123	plate.1	POSITIVE	severe	severe	M	South Asian	(60,80]	TRUE	FALSE	7	NA	4	NA	6.1	4.9	0.4	0.8	106.5	NA	NA	NA
C123_84	C123	plate.1	POSITIVE	severe	moderate	M	South Asian	(60,80]	TRUE	FALSE	18	NA	15	NA	12.6	10.6	0.9	1.1	64.1	2908	3125	23
C31_85	C31	plate.1	POSITIVE	mild	mild	F	Black	(20,40]	FALSE	FALSE	4	NA	0	NA	3.7	2.3	0.2	1	2.7	NA	500	5
C40_86	C40	plate.1	POSITIVE	critical	mild	M	Black	(40,60]	TRUE	FALSE	2	NA	2	NA	7.5	4.7	1	1.7	60.3	9325	1022	50
C40_87	C40	plate.1	POSITIVE	critical	severe	M	Black	(40,60]	TRUE	FALSE	21	NA	21	NA	9.5	5.6	1.5	2	107.4	2884	1691	NA
C116_88	C116	plate.2	POSITIVE	critical	critical	M	White	(80,100]	TRUE	FALSE	13	NA	12	NA	NA	NA	NA	NA	NA	NA	NA	NA
C34_89	C34	plate.2	POSITIVE	mild	mild	F	White	(60,80]	FALSE	FALSE	7	NA	7	NA	NA	NA	NA	NA	NA	NA	NA	NA
C113_90	C113	plate.2	POSITIVE	severe	severe	F	White	(60,80]	TRUE	FALSE	12	NA	20	NA	3.7	3	0.2	0.5	31.3	NA	NA	NA
C21_91	C21	plate.2	POSITIVE	critical	critical	M	White	(80,100]	TRUE	TRUE	20	28	19	27	7.9	7.1	0.4	0.4	163.5	NA	1086	122
C47_93	C47	plate.2	POSITIVE	mild	mild	M	Other	(60,80]	FALSE	FALSE	16	NA	14	NA	9.2	2.9	0.3	0.6	8.5	2016	485	12
C132_94	C132	plate.2	POSITIVE	moderate	mild	F	South Asian	(60,80]	FALSE	FALSE	10	NA	9	NA	NA	NA	NA	NA	NA	NA	NA	NA
C113_95	C113	plate.2	POSITIVE	severe	mild	F	White	(60,80]	TRUE	FALSE	27	NA	35	NA	2.9	1.9	0.3	0.5	34.3	NA	NA	NA
C23_96	C23	plate.2	POSITIVE	moderate	moderate	F	South Asian	(60,80]	FALSE	FALSE	15	NA	14	NA	NA	NA	NA	NA	NA	NA	NA	NA
C237_97	C237	plate.2	NEGATIVE	NEGATIVE	NEGATIVE	M	South Asian	(60,80]	FALSE	FALSE	NA	NA	NA	NA	NA	NA	NA	NA	NA	NA	NA	NA
C126_98	C126	plate.2	POSITIVE	mild	mild	M	South Asian	(60,80]	FALSE	FALSE	2	NA	2	NA	6.4	3.8	0.7	1.6	0.6	982	206	20
C47_99	C47	plate.2	POSITIVE	mild	mild	M	Other	(60,80]	FALSE	FALSE	6	NA	4	NA	NA	NA	NA	NA	NA	NA	NA	NA
C47_100	C47	plate.2	POSITIVE	mild	mild	M	Other	(60,80]	FALSE	FALSE	4	NA	2	NA	4.3	3.3	0.2	0.6	6.5	1168	340	16
C127_101	C127	plate.2	POSITIVE	moderate	moderate	F	Other	(60,80]	FALSE	FALSE	16	NA	13	NA	8.1	5.4	0.7	1.7	5.1	NA	494	NA
C113_102	C113	plate.2	POSITIVE	severe	severe	F	White	(60,80]	TRUE	FALSE	10	NA	18	NA	NA	NA	NA	NA	NA	NA	NA	NA
C126_103	C126	plate.2	POSITIVE	mild	mild	M	South Asian	(60,80]	FALSE	FALSE	13	NA	13	NA	6.4	3.7	0.6	1.8	NA	1228	NA	11
C110_105	C110	plate.2	POSITIVE	moderate	moderate	M	Black	(60,80]	FALSE	FALSE	4	NA	4	NA	NA	NA	NA	NA	NA	NA	NA	NA
C167_106	C167	plate.2	NEGATIVE	NEGATIVE	NEGATIVE	F	South Asian	(60,80]	FALSE	FALSE	NA	NA	NA	NA	NA	NA	NA	NA	NA	NA	NA	NA
C34_107	C34	plate.2	POSITIVE	mild	mild	F	White	(60,80]	FALSE	FALSE	4	NA	4	NA	NA	NA	NA	NA	NA	NA	NA	NA
C69_108	C69	plate.2	NEGATIVE	NEGATIVE	NEGATIVE	M	South Asian	(60,80]	FALSE	FALSE	NA	NA	NA	NA	NA	NA	NA	NA	NA	NA	NA	NA
C116_109	C116	plate.2	POSITIVE	critical	mild	M	White	(80,100]	TRUE	FALSE	9	NA	8	NA	NA	NA	NA	NA	NA	NA	NA	NA
C113_110	C113	plate.2	POSITIVE	severe	severe	F	White	(60,80]	TRUE	FALSE	15	NA	23	NA	3.6	2.7	0.3	0.6	11.6	NA	NA	NA
C42_111	C42	plate.2	POSITIVE	moderate	mild	M	White	(40,60]	FALSE	FALSE	14	NA	24	NA	NA	NA	NA	NA	NA	NA	NA	NA
C42_112	C42	plate.2	POSITIVE	moderate	mild	M	White	(40,60]	FALSE	FALSE	9	NA	19	NA	4.2	3	0.3	0.8	22.2	3266	788	10
C132_113	C132	plate.2	POSITIVE	moderate	mild	F	South Asian	(60,80]	FALSE	FALSE	19	NA	18	NA	NA	NA	NA	NA	NA	NA	NA	NA
C116_115	C116	plate.2	POSITIVE	critical	moderate	M	White	(80,100]	TRUE	FALSE	16	NA	15	NA	NA	NA	NA	NA	NA	NA	NA	NA
C126_116	C126	plate.2	POSITIVE	mild	mild	M	South Asian	(60,80]	FALSE	FALSE	11	NA	11	NA	NA	NA	NA	NA	NA	NA	NA	NA
C116_117	C116	plate.2	POSITIVE	critical	moderate	M	White	(80,100]	TRUE	FALSE	4	NA	3	NA	NA	NA	NA	NA	NA	NA	NA	NA
C23_118	C23	plate.2	POSITIVE	moderate	moderate	F	South Asian	(60,80]	FALSE	FALSE	13	NA	12	NA	NA	NA	NA	NA	NA	NA	NA	NA
C21_119	C21	plate.2	POSITIVE	critical	critical	M	White	(80,100]	TRUE	TRUE	16	28	15	27	6.7	5.8	0.4	0.5	147.8	3865	891	76
C126_120	C126	plate.2	POSITIVE	mild	mild	M	South Asian	(60,80]	FALSE	FALSE	9	NA	9	NA	NA	NA	NA	NA	NA	NA	NA	NA
C248_121	C248	plate.2	NEGATIVE	NEGATIVE	NEGATIVE	F	South Asian	(60,80]	FALSE	FALSE	NA	NA	NA	NA	NA	NA	NA	NA	NA	NA	NA	NA
C153_122	C153	plate.2	NEGATIVE	NEGATIVE	NEGATIVE	M	Asian (other)	(40,60]	FALSE	FALSE	NA	NA	NA	NA	NA	NA	NA	NA	NA	NA	NA	NA
C34_123	C34	plate.2	POSITIVE	mild	mild	F	White	(60,80]	FALSE	FALSE	0	NA	0	NA	2.1	1.4	1.2	1.3	41.6	5130	561	107
C132_124	C132	plate.2	POSITIVE	moderate	moderate	F	South Asian	(60,80]	FALSE	FALSE	8	NA	7	NA	8.2	4.5	0.6	2.7	3.2	1686	465	16
C126_125	C126	plate.2	POSITIVE	mild	mild	M	South Asian	(60,80]	FALSE	FALSE	5	NA	5	NA	NA	NA	NA	NA	NA	NA	NA	NA
C47_127	C47	plate.2	POSITIVE	mild	mild	M	Other	(60,80]	FALSE	FALSE	13	NA	11	NA	NA	NA	NA	NA	NA	NA	NA	NA
C21_128	C21	plate.2	POSITIVE	critical	moderate	M	White	(80,100]	TRUE	TRUE	5	28	4	27	2.1	1.6	0.1	0.4	107.1	NA	NA	152
C110_129	C110	plate.2	POSITIVE	moderate	moderate	M	Black	(60,80]	FALSE	FALSE	2	NA	2	NA	5	3.9	0.4	0.7	102.9	934	1312	68
C127_131	C127	plate.2	POSITIVE	moderate	moderate	F	Other	(60,80]	FALSE	FALSE	5	NA	2	NA	6.1	4.8	0.3	1	176.9	1895	1918	61
C21_133	C21	plate.2	POSITIVE	critical	severe	M	White	(80,100]	TRUE	TRUE	10	28	9	27	4.5	4	0.1	0.4	201.8	NA	NA	NA
C47_134	C47	plate.2	POSITIVE	mild	mild	M	Other	(60,80]	FALSE	FALSE	18	NA	16	NA	NA	NA	NA	NA	NA	NA	NA	NA
C127_136	C127	plate.2	POSITIVE	moderate	mild	F	Other	(60,80]	FALSE	FALSE	23	NA	20	NA	8.2	6.2	0.4	1.2	NA	NA	NA	NA
C110_137	C110	plate.2	POSITIVE	moderate	mild	M	Black	(60,80]	FALSE	FALSE	11	NA	11	NA	NA	NA	NA	NA	NA	NA	NA	NA
C21_138	C21	plate.2	POSITIVE	critical	critical	M	White	(80,100]	TRUE	TRUE	26	28	25	27	NA	NA	NA	NA	NA	NA	NA	NA
C113_139	C113	plate.2	POSITIVE	severe	severe	F	White	(60,80]	TRUE	FALSE	6	NA	14	NA	2.5	1.6	0.1	0.3	154.2	1562	1211	55
C42_142	C42	plate.2	POSITIVE	moderate	mild	M	White	(40,60]	FALSE	FALSE	11	NA	21	NA	NA	NA	NA	NA	NA	NA	NA	NA
C127_143	C127	plate.2	POSITIVE	moderate	moderate	F	Other	(60,80]	FALSE	FALSE	11	NA	8	NA	NA	NA	NA	NA	NA	NA	NA	NA
C23_144	C23	plate.2	POSITIVE	moderate	moderate	F	South Asian	(60,80]	FALSE	FALSE	11	NA	10	NA	NA	NA	NA	NA	NA	NA	NA	NA
C23_145	C23	plate.2	POSITIVE	moderate	moderate	F	South Asian	(60,80]	FALSE	FALSE	20	NA	19	NA	5.2	3.8	0.6	0.8	7.5	417	1381	42
C113_146	C113	plate.2	POSITIVE	severe	moderate	F	White	(60,80]	TRUE	FALSE	19	NA	27	NA	3.7	2.8	0.3	0.5	15.3	NA	NA	NA
C132_147	C132	plate.2	POSITIVE	moderate	moderate	F	South Asian	(60,80]	FALSE	FALSE	6	NA	5	NA	8.2	3.8	0.8	3.2	2.6	1978	450	18
C116_148	C116	plate.2	POSITIVE	critical	moderate	M	White	(80,100]	TRUE	FALSE	6	NA	5	NA	NA	NA	NA	NA	NA	NA	NA	NA
C127_149	C127	plate.2	POSITIVE	moderate	moderate	F	Other	(60,80]	FALSE	FALSE	14	NA	11	NA	NA	NA	NA	NA	NA	NA	NA	NA
C163_150	C163	plate.2	NEGATIVE	NEGATIVE	NEGATIVE	M	Asian (other)	(60,80]	FALSE	FALSE	NA	NA	NA	NA	NA	NA	NA	NA	NA	NA	NA	NA
C110_151	C110	plate.2	POSITIVE	moderate	mild	M	Black	(60,80]	FALSE	FALSE	14	NA	14	NA	4.9	2.8	0.6	1.3	4.7	NA	951	NA
C42_152	C42	plate.2	POSITIVE	moderate	moderate	M	White	(40,60]	FALSE	FALSE	2	NA	12	NA	NA	NA	NA	NA	NA	NA	NA	NA
C152_154	C152	plate.2	NEGATIVE	NEGATIVE	NEGATIVE	M	Other	(60,80]	FALSE	FALSE	NA	NA	NA	NA	NA	NA	NA	NA	NA	NA	NA	NA
C47_155	C47	plate.2	POSITIVE	mild	mild	M	Other	(60,80]	FALSE	FALSE	9	NA	7	NA	4	2.9	0.3	0.6	35.9	1347	937	19
C132_156	C132	plate.2	POSITIVE	moderate	mild	F	South Asian	(60,80]	FALSE	FALSE	14	NA	13	NA	7.6	4.1	0.7	2.6	3.2	1988	NA	13
C127_157	C127	plate.2	POSITIVE	moderate	mild	F	Other	(60,80]	FALSE	FALSE	21	NA	18	NA	NA	NA	NA	NA	NA	NA	NA	NA
C108_159	C108	plate.2	NEGATIVE	NEGATIVE	NEGATIVE	F	White	(60,80]	FALSE	FALSE	NA	NA	NA	NA	NA	NA	NA	NA	NA	NA	NA	NA
C196_160	C196	plate.2	NEGATIVE	NEGATIVE	NEGATIVE	M	White	(60,80]	FALSE	FALSE	NA	NA	NA	NA	NA	NA	NA	NA	NA	NA	NA	NA
C34_161	C34	plate.2	POSITIVE	mild	mild	F	White	(60,80]	FALSE	FALSE	11	NA	11	NA	NA	NA	NA	NA	NA	NA	NA	NA
C116_162	C116	plate.2	POSITIVE	critical	moderate	M	White	(80,100]	TRUE	FALSE	26	NA	25	NA	NA	NA	NA	NA	NA	NA	NA	NA
C126_163	C126	plate.2	POSITIVE	mild	mild	M	South Asian	(60,80]	FALSE	FALSE	7	NA	7	NA	6.4	3.6	0.7	1.7	0.6	913	200	12
C21_164	C21	plate.2	POSITIVE	critical	severe	M	White	(80,100]	TRUE	TRUE	12	28	11	27	4.8	4.1	0.2	0.4	200.7	4549	NA	NA
C42_166	C42	plate.2	POSITIVE	moderate	moderate	M	White	(40,60]	FALSE	FALSE	4	NA	14	NA	5.4	4.1	0.3	1	16.3	3262	1050	9
C34_167	C34	plate.2	POSITIVE	mild	mild	F	White	(60,80]	FALSE	FALSE	9	NA	9	NA	NA	NA	NA	NA	NA	NA	NA	NA
C103_169	C103	plate.2	NEGATIVE	NEGATIVE	NEGATIVE	M	Asian (other)	(60,80]	FALSE	FALSE	NA	NA	NA	NA	NA	NA	NA	NA	NA	NA	NA	NA
C23_170	C23	plate.2	POSITIVE	moderate	moderate	F	South Asian	(60,80]	FALSE	FALSE	8	NA	7	NA	3.4	2.7	0.2	0.4	125.6	NA	2786	93
C42_171	C42	plate.2	POSITIVE	moderate	mild	M	White	(40,60]	FALSE	FALSE	7	NA	17	NA	NA	NA	NA	NA	NA	NA	NA	NA
C23_172	C23	plate.2	POSITIVE	moderate	moderate	F	South Asian	(60,80]	FALSE	FALSE	18	NA	17	NA	NA	NA	NA	NA	NA	NA	NA	NA
C34_173	C34	plate.2	POSITIVE	mild	mild	F	White	(60,80]	FALSE	FALSE	2	NA	2	NA	2.5	1.6	0.2	0.4	27.4	3409	573	28
C132_174	C132	plate.2	POSITIVE	moderate	mild	F	South Asian	(60,80]	FALSE	FALSE	12	NA	11	NA	NA	NA	NA	NA	NA	NA	NA	NA
C80_176	C80	plate.3	POSITIVE	moderate	moderate	F	South Asian	(60,80]	FALSE	FALSE	11	NA	9	NA	10.5	7.7	0.5	1.7	17.2	NA	NA	NA
C24_177	C24	plate.3	POSITIVE	mild	mild	F	White	(60,80]	FALSE	FALSE	NA	NA	15	NA	NA	NA	NA	NA	NA	NA	NA	NA
C7_178	C7	plate.3	POSITIVE	mild	mild	M	Black	(80,100]	FALSE	FALSE	14	NA	14	NA	NA	NA	NA	NA	NA	NA	NA	NA
C20_179	C20	plate.3	POSITIVE	severe	moderate	M	South Asian	(60,80]	TRUE	FALSE	12	NA	11	NA	5.8	4.2	0.7	0.9	102.4	961	1379	39
C63_181	C63	plate.3	POSITIVE	moderate	moderate	M	Black	(40,60]	TRUE	FALSE	8	NA	5	NA	4.3	2.4	0.3	1.3	30.3	NA	NA	NA
C12_182	C12	plate.3	POSITIVE	severe	mild	M	South Asian	(40,60]	TRUE	FALSE	22	NA	19	NA	6.9	5.3	0.5	1.1	48	NA	NA	NA
C7_183	C7	plate.3	POSITIVE	mild	mild	M	Black	(80,100]	FALSE	FALSE	21	NA	21	NA	NA	NA	NA	NA	NA	NA	NA	NA
C22_184	C22	plate.3	POSITIVE	mild	mild	M	South Asian	(60,80]	FALSE	FALSE	13	NA	13	NA	NA	NA	NA	NA	NA	NA	NA	NA
C166_185	C166	plate.3	NEGATIVE	NEGATIVE	NEGATIVE	M	White	(60,80]	FALSE	FALSE	NA	NA	NA	NA	NA	NA	NA	NA	NA	NA	NA	NA
C9_186	C9	plate.3	POSITIVE	moderate	mild	M	Other	(40,60]	FALSE	FALSE	12	NA	7	NA	6.3	3.3	0.5	2.4	44.6	961	NA	49
C50_187	C50	plate.3	POSITIVE	severe	moderate	M	Asian (other)	(60,80]	TRUE	FALSE	23	NA	22	NA	7.3	5.4	1	0.7	11.3	NA	NA	NA
C32_188	C32	plate.3	POSITIVE	critical	severe	M	White	(60,80]	TRUE	TRUE	NA	NA	14	16	13.7	12	1.3	0.4	NA	1608	NA	57
C11_189	C11	plate.3	POSITIVE	severe	moderate	M	White	(60,80]	TRUE	FALSE	NA	NA	19	NA	9.2	7.8	0.4	0.7	50.9	NA	NA	NA
C7_190	C7	plate.3	POSITIVE	mild	mild	M	Black	(80,100]	FALSE	FALSE	11	NA	11	NA	NA	NA	NA	NA	NA	NA	NA	NA
C9_191	C9	plate.3	POSITIVE	moderate	mild	M	Other	(40,60]	FALSE	FALSE	24	NA	19	NA	10.6	6.7	0.8	2.9	16	1898	212	24
C63_193	C63	plate.3	POSITIVE	moderate	mild	M	Black	(40,60]	TRUE	FALSE	17	NA	14	NA	7.1	4.8	0.5	1.4	24.2	574	313	11
C169_194	C169	plate.3	NEGATIVE	NEGATIVE	NEGATIVE	F	South Asian	(60,80]	FALSE	FALSE	NA	NA	NA	NA	NA	NA	NA	NA	NA	NA	NA	NA
C24_195	C24	plate.3	POSITIVE	mild	mild	F	White	(60,80]	FALSE	FALSE	NA	NA	13	NA	NA	NA	NA	NA	NA	NA	NA	NA
C29_196	C29	plate.3	NEGATIVE	NEGATIVE	NEGATIVE	M	South Asian	(60,80]	FALSE	FALSE	NA	NA	NA	NA	NA	NA	NA	NA	NA	NA	NA	NA
C80_197	C80	plate.3	POSITIVE	moderate	moderate	F	South Asian	(60,80]	FALSE	FALSE	9	NA	7	NA	NA	NA	NA	NA	NA	NA	NA	NA
C7_198	C7	plate.3	POSITIVE	mild	mild	M	Black	(80,100]	FALSE	FALSE	16	NA	16	NA	NA	NA	NA	NA	NA	NA	NA	NA
C50_199	C50	plate.3	POSITIVE	severe	moderate	M	Asian (other)	(60,80]	TRUE	FALSE	16	NA	15	NA	7.9	6.1	0.9	0.8	30.8	NA	NA	NA
C27_200	C27	plate.3	POSITIVE	mild	mild	M	South Asian	(80,100]	FALSE	FALSE	15	NA	14	NA	NA	NA	NA	NA	NA	NA	NA	NA
C128_201	C128	plate.3	POSITIVE	mild	mild	M	South Asian	(60,80]	FALSE	FALSE	14	NA	11	NA	NA	NA	NA	NA	NA	NA	NA	NA
C80_203	C80	plate.3	POSITIVE	moderate	mild	F	South Asian	(60,80]	FALSE	FALSE	14	NA	12	NA	10	7.8	0.4	1.3	8.5	764	1243	21
C9_204	C9	plate.3	POSITIVE	moderate	moderate	M	Other	(40,60]	FALSE	FALSE	23	NA	18	NA	NA	NA	NA	NA	NA	NA	NA	NA
C80_205	C80	plate.3	POSITIVE	moderate	moderate	F	South Asian	(60,80]	FALSE	FALSE	6	NA	4	NA	5.7	4.2	0.4	1.1	102.7	786	930	59
C22_206	C22	plate.3	POSITIVE	mild	mild	M	South Asian	(60,80]	FALSE	FALSE	11	NA	11	NA	NA	NA	NA	NA	NA	NA	NA	NA
C20_207	C20	plate.3	POSITIVE	severe	moderate	M	South Asian	(60,80]	TRUE	FALSE	9	NA	8	NA	3	2.1	0.3	0.5	81.5	704	1227	28
C9_208	C9	plate.3	POSITIVE	moderate	moderate	M	Other	(40,60]	FALSE	FALSE	19	NA	14	NA	NA	NA	NA	NA	NA	NA	NA	NA
C89_209	C89	plate.3	NEGATIVE	NEGATIVE	NEGATIVE	F	South Asian	(60,80]	FALSE	FALSE	NA	NA	NA	NA	NA	NA	NA	NA	NA	NA	NA	NA
C212_210	C212	plate.3	NEGATIVE	NEGATIVE	NEGATIVE	M	White	(40,60]	FALSE	FALSE	NA	NA	NA	NA	NA	NA	NA	NA	NA	NA	NA	NA
C24_211	C24	plate.3	POSITIVE	mild	mild	F	White	(60,80]	FALSE	FALSE	NA	NA	8	NA	4.3	2	0.6	1.4	43.2	857	NA	NA
C12_212	C12	plate.3	POSITIVE	severe	mild	M	South Asian	(40,60]	TRUE	FALSE	19	NA	16	NA	5.6	4.1	0.5	0.9	67.4	NA	NA	NA
C9_213	C9	plate.3	POSITIVE	moderate	mild	M	Other	(40,60]	FALSE	FALSE	14	NA	9	NA	NA	NA	NA	NA	NA	NA	NA	NA
C63_215	C63	plate.3	POSITIVE	moderate	moderate	M	Black	(40,60]	TRUE	FALSE	5	NA	2	NA	5.5	4	0.4	1	27.4	NA	NA	NA
C63_217	C63	plate.3	POSITIVE	moderate	mild	M	Black	(40,60]	TRUE	FALSE	15	NA	12	NA	6.7	4.4	0.5	1.5	22	NA	NA	NA
C128_218	C128	plate.3	POSITIVE	mild	mild	M	South Asian	(60,80]	FALSE	FALSE	16	NA	13	NA	6.9	5.2	0.6	1	119.4	NA	NA	50
C11_219	C11	plate.3	POSITIVE	severe	moderate	M	White	(60,80]	TRUE	FALSE	NA	NA	13	NA	5.3	4.2	0.4	0.6	230.2	NA	638	NA
C63_222	C63	plate.3	POSITIVE	moderate	mild	M	Black	(40,60]	TRUE	FALSE	12	NA	9	NA	5.5	3.3	0.4	1.3	10.4	NA	NA	NA
C12_224	C12	plate.3	POSITIVE	severe	severe	M	South Asian	(40,60]	TRUE	FALSE	11	NA	8	NA	7	6	0.2	0.8	364.3	NA	NA	NA
C37_225	C37	plate.3	POSITIVE	critical	critical	F	Asian (other)	(80,100]	TRUE	TRUE	9	19	5	15	6.5	5.8	0.2	0.5	105.4	NA	NA	271
C20_226	C20	plate.3	POSITIVE	severe	mild	M	South Asian	(60,80]	TRUE	FALSE	14	NA	13	NA	5	3.8	0.4	0.7	82.8	NA	NA	NA
C7_227	C7	plate.3	POSITIVE	mild	mild	M	Black	(80,100]	FALSE	FALSE	9	NA	9	NA	5.8	3.1	0.7	1.9	11.2	1958	825	100
C50_230	C50	plate.3	POSITIVE	severe	severe	M	Asian (other)	(60,80]	TRUE	FALSE	14	NA	13	NA	8.6	7.1	1	0.4	66.7	NA	NA	NA
C11_231	C11	plate.3	POSITIVE	severe	moderate	M	White	(60,80]	TRUE	FALSE	NA	NA	15	NA	7.6	6	0.7	0.7	160.3	574	642	30
C22_232	C22	plate.3	POSITIVE	mild	mild	M	South Asian	(60,80]	FALSE	FALSE	8	NA	8	NA	4.6	3.3	0.5	0.9	97.1	26.1	3003	28
C22_233	C22	plate.3	POSITIVE	mild	mild	M	South Asian	(60,80]	FALSE	FALSE	18	NA	18	NA	NA	NA	NA	NA	NA	NA	NA	NA
C7_234	C7	plate.3	POSITIVE	mild	mild	M	Black	(80,100]	FALSE	FALSE	18	NA	18	NA	NA	NA	NA	NA	NA	NA	NA	NA
C12_235	C12	plate.3	POSITIVE	severe	moderate	M	South Asian	(40,60]	TRUE	FALSE	17	NA	14	NA	6.6	5.4	0.4	0.7	NA	NA	3082	NA
C80_236	C80	plate.3	POSITIVE	moderate	moderate	F	South Asian	(60,80]	FALSE	FALSE	7	NA	5	NA	NA	NA	NA	NA	NA	NA	NA	NA
C11_237	C11	plate.3	POSITIVE	severe	moderate	M	White	(60,80]	TRUE	FALSE	NA	NA	17	NA	6.3	5.1	0.3	0.5	65.8	371	516	21
C142_238	C142	plate.3	NEGATIVE	NEGATIVE	NEGATIVE	M	South Asian	(60,80]	FALSE	FALSE	NA	NA	NA	NA	NA	NA	NA	NA	NA	NA	NA	NA
C37_239	C37	plate.3	POSITIVE	critical	critical	F	Asian (other)	(80,100]	TRUE	TRUE	12	19	8	15	7.9	7	0.4	0.5	155.7	NA	NA	NA
C27_240	C27	plate.3	POSITIVE	mild	mild	M	South Asian	(80,100]	FALSE	FALSE	6	NA	5	NA	5.5	4.3	0.4	0.6	66	1824	748	37
C128_241	C128	plate.3	POSITIVE	mild	mild	M	South Asian	(60,80]	FALSE	FALSE	21	NA	18	NA	NA	NA	NA	NA	NA	NA	NA	NA
C193_242	C193	plate.3	NEGATIVE	NEGATIVE	NEGATIVE	M	White	(80,100]	FALSE	FALSE	NA	NA	NA	NA	NA	NA	NA	NA	NA	NA	NA	NA
C50_243	C50	plate.3	POSITIVE	severe	moderate	M	Asian (other)	(60,80]	TRUE	FALSE	27	NA	26	NA	6.1	4.5	0.8	0.6	8.2	NA	NA	NA
C128_244	C128	plate.3	POSITIVE	mild	mild	M	South Asian	(60,80]	FALSE	FALSE	5	NA	2	NA	4.6	2.6	0.8	1.2	4.2	598	299	29
C11_245	C11	plate.3	POSITIVE	severe	mild	M	White	(60,80]	TRUE	FALSE	NA	NA	21	NA	8	6.7	0.4	0.6	43.2	NA	NA	NA
C134_247	C134	plate.3	NEGATIVE	NEGATIVE	NEGATIVE	F	Black	(60,80]	FALSE	FALSE	NA	NA	NA	NA	NA	NA	NA	NA	NA	NA	NA	NA
C240_248	C240	plate.3	NEGATIVE	NEGATIVE	NEGATIVE	M	South Asian	(60,80]	FALSE	FALSE	NA	NA	NA	NA	NA	NA	NA	NA	NA	NA	NA	NA
C27_249	C27	plate.3	POSITIVE	mild	mild	M	South Asian	(80,100]	FALSE	FALSE	3	NA	2	NA	8.1	7.1	0.5	0.5	172.6	NA	NA	90
C80_250	C80	plate.3	POSITIVE	moderate	mild	F	South Asian	(60,80]	FALSE	FALSE	16	NA	14	NA	9.9	7.6	0.3	1.7	12.4	818	1160	20
C9_251	C9	plate.3	POSITIVE	moderate	mild	M	Other	(40,60]	FALSE	FALSE	17	NA	12	NA	NA	NA	NA	NA	NA	NA	NA	NA
C20_252	C20	plate.3	POSITIVE	severe	moderate	M	South Asian	(60,80]	TRUE	FALSE	8	NA	7	NA	4.8	3.5	0.6	0.6	182.3	1019	1910	42
C27_254	C27	plate.3	POSITIVE	mild	mild	M	South Asian	(80,100]	FALSE	FALSE	8	NA	7	NA	8.1	6.7	0.8	0.5	71.3	NA	NA	NA
C32_255	C32	plate.3	POSITIVE	critical	critical	M	White	(60,80]	TRUE	TRUE	NA	NA	16	16	23.1	21.2	0.7	1.3	194.4	NA	NA	NA
C128_256	C128	plate.3	POSITIVE	mild	mild	M	South Asian	(60,80]	FALSE	FALSE	23	NA	20	NA	7.4	4.9	0.8	1.6	13.4	1286	1127	13
C234_257	C234	plate.3	NEGATIVE	NEGATIVE	NEGATIVE	F	South Asian	(60,80]	FALSE	FALSE	NA	NA	NA	NA	NA	NA	NA	NA	NA	NA	NA	NA
C20_258	C20	plate.3	POSITIVE	severe	mild	M	South Asian	(60,80]	TRUE	FALSE	16	NA	15	NA	6	3.6	0.7	1.4	32.1	NA	NA	NA
C27_259	C27	plate.3	POSITIVE	mild	mild	M	South Asian	(80,100]	FALSE	FALSE	13	NA	12	NA	NA	NA	NA	NA	NA	NA	NA	NA
C22_260	C22	plate.3	POSITIVE	mild	mild	M	South Asian	(60,80]	FALSE	FALSE	15	NA	15	NA	NA	NA	NA	NA	NA	NA	NA	NA
C24_261	C24	plate.3	POSITIVE	mild	mild	F	White	(60,80]	FALSE	FALSE	NA	NA	11	NA	NA	NA	NA	NA	NA	NA	NA	NA
C12_262	C12	plate.3	POSITIVE	severe	mild	M	South Asian	(40,60]	TRUE	FALSE	24	NA	21	NA	5.3	3.9	0.4	1	50.3	NA	NA	NA
C87_264	C87	plate.4	POSITIVE	mild	mild	M	Asian (other)	(60,80]	FALSE	FALSE	13	NA	13	NA	NA	NA	NA	NA	NA	NA	NA	NA
C59_267	C59	plate.4	POSITIVE	severe	moderate	M	South Asian	(40,60]	TRUE	FALSE	9	NA	8	NA	NA	NA	NA	NA	NA	NA	NA	NA
C25_268	C25	plate.4	POSITIVE	moderate	mild	M	Black	(20,40]	TRUE	FALSE	11	NA	11	NA	5.2	3.7	0.3	0.8	30.6	3914	NA	NA
C48_269	C48	plate.4	POSITIVE	critical	critical	M	Other	(60,80]	TRUE	TRUE	4	6	2	4	5.9	4.9	0.4	0.4	328.5	1146	1932	65
C129_270	C129	plate.4	POSITIVE	mild	mild	M	Other	(60,80]	FALSE	FALSE	13	NA	12	NA	5.7	5	0.3	0.4	141.6	2694	3413	279
C87_271	C87	plate.4	POSITIVE	mild	mild	M	Asian (other)	(60,80]	FALSE	FALSE	2	NA	2	NA	5.9	4.9	0.4	0.6	92.2	1479	940	115
C73_272	C73	plate.4	POSITIVE	severe	mild	M	White	(80,100]	TRUE	FALSE	11	NA	7	NA	4.3	3.3	0.4	0.6	190	1562	NA	956
C242_273	C242	plate.4	NEGATIVE	NEGATIVE	NEGATIVE	M	Other	(40,60]	FALSE	FALSE	NA	NA	NA	NA	NA	NA	NA	NA	NA	NA	NA	NA
C93_274	C93	plate.4	POSITIVE	moderate	moderate	M	White	(80,100]	TRUE	FALSE	13	NA	13	NA	12.7	10.6	0.8	1.2	7.2	1055	430	28
C82_275	C82	plate.4	POSITIVE	mild	mild	F	Other	(60,80]	TRUE	FALSE	8	NA	32	NA	1.9	0.5	0.2	1.1	3.5	NA	NA	NA
C82_276	C82	plate.4	POSITIVE	mild	mild	F	Other	(60,80]	TRUE	FALSE	6	NA	30	NA	4.7	2.8	0.5	1.4	8.7	NA	NA	NA
C125_277	C125	plate.4	POSITIVE	severe	mild	M	Asian (other)	(40,60]	TRUE	FALSE	27	NA	27	NA	3.7	2.5	0.6	0.5	27.3	NA	264	NA
C68_278	C68	plate.4	POSITIVE	mild	mild	M	Other	(60,80]	FALSE	FALSE	5	NA	5	NA	NA	NA	NA	NA	NA	NA	NA	NA
C124_279	C124	plate.4	POSITIVE	moderate	mild	M	South Asian	(80,100]	FALSE	FALSE	14	NA	9	NA	12.4	10.1	1.1	1	24.3	NA	1253	NA
C105_280	C105	plate.4	POSITIVE	mild	mild	F	South Asian	(60,80]	FALSE	FALSE	8	NA	5	NA	NA	NA	NA	NA	NA	NA	NA	NA
C66_281	C66	plate.4	POSITIVE	critical	severe	F	Black	(60,80]	TRUE	TRUE	5	9	0	4	13.1	12.1	0.6	0.4	386.1	1956	1287	93
C214_282	C214	plate.4	NEGATIVE	NEGATIVE	NEGATIVE	F	White	(60,80]	FALSE	FALSE	NA	NA	NA	NA	NA	NA	NA	NA	NA	NA	NA	NA
C99_283	C99	plate.4	POSITIVE	critical	severe	M	White	(60,80]	TRUE	FALSE	18	NA	8	NA	4.5	4	0.2	0.2	189.4	NA	NA	NA
C251_284	C251	plate.4	NEGATIVE	NEGATIVE	NEGATIVE	M	South Asian	(40,60]	FALSE	FALSE	NA	NA	NA	NA	NA	NA	NA	NA	NA	NA	NA	NA
C87_285	C87	plate.4	POSITIVE	mild	mild	M	Asian (other)	(60,80]	FALSE	FALSE	11	NA	11	NA	NA	NA	NA	NA	NA	NA	NA	NA
C68_286	C68	plate.4	POSITIVE	mild	mild	M	Other	(60,80]	FALSE	FALSE	9	NA	9	NA	NA	NA	NA	NA	NA	NA	NA	NA
C36_287	C36	plate.4	POSITIVE	moderate	mild	M	South Asian	(60,80]	TRUE	FALSE	16	NA	13	NA	NA	NA	NA	NA	NA	NA	NA	NA
C36_288	C36	plate.4	POSITIVE	moderate	mild	M	South Asian	(60,80]	TRUE	FALSE	10	NA	7	NA	7.5	6	NA	1	14.7	NA	NA	NA
C105_290	C105	plate.4	POSITIVE	mild	mild	F	South Asian	(60,80]	FALSE	FALSE	15	NA	12	NA	NA	NA	NA	NA	NA	NA	NA	NA
C93_291	C93	plate.4	POSITIVE	moderate	mild	M	White	(80,100]	TRUE	FALSE	7	NA	7	NA	7.8	5.4	1	1.2	43.8	NA	NA	NA
C124_292	C124	plate.4	POSITIVE	moderate	mild	M	South Asian	(80,100]	FALSE	FALSE	12	NA	7	NA	NA	NA	NA	NA	NA	NA	NA	NA
C87_293	C87	plate.4	POSITIVE	mild	mild	M	Asian (other)	(60,80]	FALSE	FALSE	6	NA	6	NA	NA	NA	NA	NA	NA	NA	NA	NA
C73_294	C73	plate.4	POSITIVE	severe	moderate	M	White	(80,100]	TRUE	FALSE	9	NA	5	NA	7.5	6.5	0.5	0.4	239	NA	NA	NA
C59_295	C59	plate.4	POSITIVE	severe	moderate	M	South Asian	(40,60]	TRUE	FALSE	7	NA	6	NA	4.9	3.1	0.2	1.5	140.8	2374	1224	73
C124_296	C124	plate.4	POSITIVE	moderate	moderate	M	South Asian	(80,100]	FALSE	FALSE	9	NA	4	NA	5	3.9	0.3	0.7	129.1	5144	638	69
C64_297	C64	plate.4	NEGATIVE	NEGATIVE	NEGATIVE	M	South Asian	(60,80]	FALSE	FALSE	NA	NA	NA	NA	NA	NA	NA	NA	NA	NA	NA	NA
C137_298	C137	plate.4	NEGATIVE	NEGATIVE	NEGATIVE	F	South Asian	(60,80]	FALSE	FALSE	NA	NA	NA	NA	NA	NA	NA	NA	NA	NA	NA	NA
C99_299	C99	plate.4	POSITIVE	critical	critical	M	White	(60,80]	TRUE	FALSE	13	NA	3	NA	4.2	4	0.1	0.1	342.5	1934	10440	591
C129_300	C129	plate.4	POSITIVE	mild	mild	M	Other	(60,80]	FALSE	FALSE	8	NA	7	NA	5.7	4.8	0.4	0.4	68.7	968	1155	76
C93_301	C93	plate.4	POSITIVE	moderate	mild	M	White	(80,100]	TRUE	FALSE	15	NA	15	NA	NA	NA	NA	NA	NA	NA	NA	NA
C18_302	C18	plate.4	POSITIVE	severe	mild	M	South Asian	(60,80]	TRUE	FALSE	14	NA	19	NA	4.9	3.8	0.1	1	17.5	NA	NA	NA
C48_303	C48	plate.4	POSITIVE	critical	moderate	M	Other	(60,80]	TRUE	TRUE	2	6	0	4	NA	NA	NA	NA	NA	NA	NA	NA
C25_304	C25	plate.4	POSITIVE	moderate	mild	M	Black	(20,40]	TRUE	FALSE	14	NA	14	NA	9.2	3.4	0.6	0.9	42	NA	NA	NA
C49_305	C49	plate.4	POSITIVE	critical	severe	M	White	(60,80]	TRUE	TRUE	7	9	5	7	6.2	5.8	0.2	0.1	343.8	NA	6512	NA
C124_307	C124	plate.4	POSITIVE	moderate	mild	M	South Asian	(80,100]	FALSE	FALSE	16	NA	11	NA	NA	NA	NA	NA	NA	NA	NA	NA
C25_309	C25	plate.4	POSITIVE	moderate	mild	M	Black	(20,40]	TRUE	FALSE	16	NA	16	NA	8.3	3.5	0.7	0.5	78.4	NA	NA	NA
C49_310	C49	plate.4	POSITIVE	critical	moderate	M	White	(60,80]	TRUE	TRUE	2	9	0	7	2.9	2.3	0.3	0.3	156.8	1165	2038	NA
C129_312	C129	plate.4	POSITIVE	mild	mild	M	Other	(60,80]	FALSE	FALSE	3	NA	2	NA	4.2	3.1	0.5	0.6	15.6	523	381	41
C66_313	C66	plate.4	POSITIVE	critical	critical	F	Black	(60,80]	TRUE	TRUE	8	9	3	4	14.4	13.2	0.7	0.5	335.9	2256	1535	55
C59_314	C59	plate.4	POSITIVE	severe	mild	M	South Asian	(40,60]	TRUE	FALSE	12	NA	11	NA	NA	NA	NA	NA	NA	NA	NA	NA
C68_315	C68	plate.4	POSITIVE	mild	mild	M	Other	(60,80]	FALSE	FALSE	2	NA	2	NA	5.8	4.4	0.8	0.6	71.9	3168	417	23
C105_316	C105	plate.4	POSITIVE	mild	mild	F	South Asian	(60,80]	FALSE	FALSE	5	NA	2	NA	NA	NA	NA	NA	NA	NA	NA	NA
C105_317	C105	plate.4	POSITIVE	mild	mild	F	South Asian	(60,80]	FALSE	FALSE	3	NA	0	NA	5.8	4.4	0.5	0.8	30.4	1986	1403	98
C36_318	C36	plate.4	POSITIVE	moderate	mild	M	South Asian	(60,80]	TRUE	FALSE	12	NA	9	NA	3.8	2.4	0.3	1.1	12.8	NA	NA	NA
C125_319	C125	plate.4	POSITIVE	severe	mild	M	Asian (other)	(40,60]	TRUE	FALSE	11	NA	11	NA	3.1	2	0.3	0.7	227.1	NA	NA	NA
C73_320	C73	plate.4	POSITIVE	severe	moderate	M	White	(80,100]	TRUE	FALSE	7	NA	3	NA	4	3.4	0.2	0.3	96.7	NA	NA	15749
C99_321	C99	plate.4	POSITIVE	critical	severe	M	White	(60,80]	TRUE	FALSE	11	NA	1	NA	2.5	2.3	0.1	0.1	271.6	NA	NA	NA
C68_322	C68	plate.4	POSITIVE	mild	mild	M	Other	(60,80]	FALSE	FALSE	12	NA	12	NA	NA	NA	NA	NA	NA	NA	NA	NA
C129_323	C129	plate.4	POSITIVE	mild	mild	M	Other	(60,80]	FALSE	FALSE	6	NA	5	NA	NA	NA	NA	NA	NA	NA	NA	NA
C87_324	C87	plate.4	POSITIVE	mild	mild	M	Asian (other)	(60,80]	FALSE	FALSE	9	NA	9	NA	NA	NA	NA	NA	NA	NA	NA	NA
C125_325	C125	plate.4	POSITIVE	severe	mild	M	Asian (other)	(40,60]	TRUE	FALSE	14	NA	14	NA	3.6	2.5	0.4	0.7	39.1	NA	NA	NA
C195_326	C195	plate.4	NEGATIVE	NEGATIVE	NEGATIVE	M	Other	(80,100]	FALSE	FALSE	NA	NA	NA	NA	NA	NA	NA	NA	NA	NA	NA	NA
C105_327	C105	plate.4	NEGATIVE	NEGATIVE	NEGATIVE	F	South Asian	(60,80]	FALSE	FALSE	-4	NA	-7	NA	NA	NA	NA	NA	NA	NA	NA	NA
C17_328	C17	plate.4	POSITIVE	severe	severe	M	Other	(80,100]	TRUE	FALSE	8	NA	6	NA	3.8	NA	NA	NA	45.8	NA	1923	53
C18_329	C18	plate.4	POSITIVE	severe	moderate	M	South Asian	(60,80]	TRUE	FALSE	9	NA	14	NA	5.2	4.5	0.3	0.5	70.5	NA	NA	NA
C164_330	C164	plate.4	NEGATIVE	NEGATIVE	NEGATIVE	M	South Asian	(60,80]	FALSE	FALSE	NA	NA	NA	NA	NA	NA	NA	NA	NA	NA	NA	NA
C82_331	C82	plate.4	POSITIVE	mild	mild	F	Other	(60,80]	TRUE	FALSE	11	NA	35	NA	3.2	2	0.2	1	2	NA	NA	NA
C125_333	C125	plate.4	POSITIVE	severe	mild	M	Asian (other)	(40,60]	TRUE	FALSE	29	NA	29	NA	NA	NA	NA	NA	NA	NA	NA	NA
C105_334	C105	plate.4	POSITIVE	mild	mild	F	South Asian	(60,80]	FALSE	FALSE	10	NA	7	NA	6.6	4.9	0.6	1	5.7	NA	994	NA
C130_335	C130	plate.4	NEGATIVE	NEGATIVE	NEGATIVE	M	Other	(60,80]	FALSE	FALSE	NA	NA	NA	NA	NA	NA	NA	NA	NA	NA	NA	NA
C180_336	C180	plate.4	NEGATIVE	NEGATIVE	NEGATIVE	M	South Asian	(40,60]	FALSE	FALSE	NA	NA	NA	NA	NA	NA	NA	NA	NA	NA	NA	NA
C149_337	C149	plate.4	POSITIVE	mild	mild	M	White	(60,80]	FALSE	FALSE	14	NA	14	NA	NA	NA	NA	NA	NA	NA	NA	NA
C93_338	C93	plate.4	POSITIVE	moderate	mild	M	White	(80,100]	TRUE	FALSE	10	NA	10	NA	NA	NA	NA	NA	NA	NA	NA	NA
C93_339	C93	plate.4	POSITIVE	moderate	mild	M	White	(80,100]	TRUE	FALSE	20	NA	20	NA	NA	NA	NA	NA	NA	NA	NA	NA
C25_340	C25	plate.4	POSITIVE	moderate	mild	M	Black	(20,40]	TRUE	FALSE	18	NA	18	NA	7.5	3.3	0.5	1	46	NA	NA	NA
C17_342	C17	plate.4	POSITIVE	severe	severe	M	Other	(80,100]	TRUE	FALSE	9	NA	7	NA	5	2.8	0.6	1.3	19.1	1969	1374	35
C105_343	C105	plate.4	POSITIVE	mild	mild	F	South Asian	(60,80]	FALSE	FALSE	17	NA	14	NA	NA	NA	NA	NA	NA	NA	NA	NA
C18_344	C18	plate.4	POSITIVE	severe	moderate	M	South Asian	(60,80]	TRUE	FALSE	10	NA	15	NA	3.9	3.1	0.1	0.6	50	NA	1768	NA
C189_345	C189	plate.4	NEGATIVE	NEGATIVE	NEGATIVE	M	Black	(40,60]	FALSE	FALSE	NA	NA	NA	NA	NA	NA	NA	NA	NA	NA	NA	NA
C59_346	C59	plate.4	POSITIVE	severe	mild	M	South Asian	(40,60]	TRUE	FALSE	16	NA	15	NA	NA	NA	NA	NA	NA	NA	NA	NA
C17_347	C17	plate.4	POSITIVE	severe	mild	M	Other	(80,100]	TRUE	FALSE	14	NA	12	NA	4	2.4	0.3	1	12.1	1912	NA	NA
C73_348	C73	plate.4	POSITIVE	severe	mild	M	White	(80,100]	TRUE	FALSE	14	NA	10	NA	5.9	4.9	0.4	0.5	53.7	NA	NA	200
C99_349	C99	plate.4	POSITIVE	critical	severe	M	White	(60,80]	TRUE	FALSE	16	NA	6	NA	4.6	4.3	0.1	0.2	316.6	NA	NA	159
C18_351	C18	plate.4	POSITIVE	severe	mild	M	South Asian	(60,80]	TRUE	FALSE	12	NA	17	NA	4.3	3.4	0	0.8	25.5	NA	NA	NA
C246_352	C246	plate.5	NEGATIVE	NEGATIVE	NEGATIVE	M	White	(60,80]	FALSE	FALSE	NA	NA	NA	NA	NA	NA	NA	NA	NA	NA	NA	NA
C84_353	C84	plate.5	POSITIVE	critical	moderate	M	South Asian	(60,80]	TRUE	TRUE	3	7	3	7	11.7	11	0.4	0.2	278	NA	5828	281
C241_354	C241	plate.5	NEGATIVE	NEGATIVE	NEGATIVE	M	Black	(60,80]	FALSE	FALSE	NA	NA	NA	NA	NA	NA	NA	NA	NA	NA	NA	NA
C67_355	C67	plate.5	POSITIVE	moderate	moderate	F	Other	(60,80]	TRUE	FALSE	3	NA	2	NA	10.7	8.4	1.5	0.8	125.5	1424	1028	484
C106_360	C106	plate.5	NEGATIVE	NEGATIVE	NEGATIVE	M	White	(80,100]	FALSE	FALSE	NA	NA	NA	NA	NA	NA	NA	NA	NA	NA	NA	NA
C224_361	C224	plate.5	NEGATIVE	NEGATIVE	NEGATIVE	M	South Asian	(60,80]	FALSE	FALSE	NA	NA	NA	NA	NA	NA	NA	NA	NA	NA	NA	NA
C77_363	C77	plate.5	POSITIVE	critical	moderate	F	White	(60,80]	TRUE	TRUE	11	44	7	40	6.3	4.8	0.5	0.9	350.1	NA	NA	NA
C161_364	C161	plate.5	NEGATIVE	NEGATIVE	NEGATIVE	M	Other	(60,80]	FALSE	FALSE	NA	NA	NA	NA	NA	NA	NA	NA	NA	NA	NA	NA
C85_365	C85	plate.5	NEGATIVE	NEGATIVE	NEGATIVE	F	White	(60,80]	FALSE	FALSE	NA	NA	NA	NA	NA	NA	NA	NA	NA	NA	NA	NA
C197_366	C197	plate.5	NEGATIVE	NEGATIVE	NEGATIVE	F	Black	(60,80]	FALSE	FALSE	NA	NA	NA	NA	NA	NA	NA	NA	NA	NA	NA	NA
C173_367	C173	plate.5	NEGATIVE	NEGATIVE	NEGATIVE	M	Black	(40,60]	FALSE	FALSE	NA	NA	NA	NA	NA	NA	NA	NA	NA	NA	NA	NA
C245_368	C245	plate.5	NEGATIVE	NEGATIVE	NEGATIVE	M	South Asian	(60,80]	FALSE	FALSE	NA	NA	NA	NA	NA	NA	NA	NA	NA	NA	NA	NA
C57_371	C57	plate.5	POSITIVE	critical	severe	F	South Asian	(60,80]	TRUE	TRUE	0	10	0	10	3.6	2.5	0.2	0.9	NA	330	NA	NA
C70_372	C70	plate.5	NEGATIVE	NEGATIVE	NEGATIVE	M	White	(60,80]	FALSE	FALSE	NA	NA	NA	NA	NA	NA	NA	NA	NA	NA	NA	NA
C77_374	C77	plate.5	POSITIVE	critical	mild	F	White	(60,80]	TRUE	TRUE	20	44	16	40	6.4	5	0.5	0.8	261.2	5094	734	40
