# Supplementary material for: Longitudinal proteomic profiling of dialysis patients with COVID-19 reveals markers of severity and predictors of death
Source: eLife journal article supplement (doi:10.7554/elife.64827), 2021-03-11
Supplement: supp [file elife-64827-supp-v1.zip › elife_poa_e64827_Source_data_3.csv]

SampleID	Individual_ID	UniProt	GeneID	Assay	NPX	Panel	Index
CV21_1	CV21	P42785	PRCP	PRCP	2.20938	CM	1
C161_2	C161	P42785	PRCP	PRCP	1.58386	CM	2
C173_3	C173	P42785	PRCP	PRCP	0.85673	CM	3
CV11_4	CV11	P42785	PRCP	PRCP	1.63151	CM	4
CV59_5	CV59	P42785	PRCP	PRCP	0.64489	CM	5
C193_6	C193	P42785	PRCP	PRCP	0.65128	CM	6
C33_7	C33	P42785	PRCP	PRCP	0.69374	CM	7
CV39_8	CV39	P42785	PRCP	PRCP	1.09712	CM	8
CV6_9	CV6	P42785	PRCP	PRCP	1.8995	CM	9
CV38_10	CV38	P42785	PRCP	PRCP	1.72346	CM	10
CV4_11	CV4	P42785	PRCP	PRCP	0.69872	CM	11
C195_12	C195	P42785	PRCP	PRCP	1.07357	CM	12
CV1_13	CV1	P42785	PRCP	PRCP	0.61055	CM	13
C237_14	C237	P42785	PRCP	PRCP	1.19429	CM	14
CV2_15	CV2	P42785	PRCP	PRCP	0.32423	CM	15
C189_16	C189	P42785	PRCP	PRCP	0.94542	CM	16
CV42_17	CV42	P42785	PRCP	PRCP	1.97023	CM	17
CV79_18	CV79	P42785	PRCP	PRCP	1.38031	CM	18
CV3_19	CV3	P42785	PRCP	PRCP	0.28226	CM	19
CV36_20	CV36	P42785	PRCP	PRCP	1.41429	CM	20
CV55_21	CV55	P42785	PRCP	PRCP	1.3812	CM	21
C246_22	C246	P42785	PRCP	PRCP	1.18128	CM	22
CV30_23	CV30	P42785	PRCP	PRCP	0.72615	CM	23
CV19_24	CV19	P42785	PRCP	PRCP	1.10595	CM	24
CV13_25	CV13	P42785	PRCP	PRCP	1.04624	CM	25
C137_26	C137	P42785	PRCP	PRCP	1.22877	CM	26
CV47_27	CV47	P42785	PRCP	PRCP	1.13348	CM	27
CV29_28	CV29	P42785	PRCP	PRCP	1.3137	CM	28
CV14_29	CV14	P42785	PRCP	PRCP	0.64687	CM	29
CV56_30	CV56	P42785	PRCP	PRCP	1.26696	CM	30
CV82_31	CV82	P42785	PRCP	PRCP	1.15391	CM	31
CV23_32	CV23	P42785	PRCP	PRCP	0.86612	CM	32
CV37_33	CV37	P42785	PRCP	PRCP	2.48796	CM	33
CV34_34	CV34	P42785	PRCP	PRCP	1.47269	CM	34
CV58_35	CV58	P42785	PRCP	PRCP	1.44817	CM	35
CV22_36	CV22	P42785	PRCP	PRCP	1.78143	CM	36
CV65_37	CV65	P42785	PRCP	PRCP	0.17031	CM	37
CV79_38	CV79	P42785	PRCP	PRCP	1.19992	CM	38
CV1_39	CV1	P42785	PRCP	PRCP	1.46647	CM	39
CV51_40	CV51	P42785	PRCP	PRCP	0.96487	CM	40
CV42_41	CV42	P42785	PRCP	PRCP	1.13861	CM	41
CV19_42	CV19	P42785	PRCP	PRCP	1.37234	CM	42
CV70_43	CV70	P42785	PRCP	PRCP	1.27972	CM	43
C78_44	C78	P42785	PRCP	PRCP	2.03132	CM	44
CV10_45	CV10	P42785	PRCP	PRCP	0.70683	CM	45
CV8_46	CV8	P42785	PRCP	PRCP	1.20006	CM	46
CV60_47	CV60	P42785	PRCP	PRCP	2.4806	CM	47
CV35_48	CV35	P42785	PRCP	PRCP	2.02081	CM	48
CV48_49	CV48	P42785	PRCP	PRCP	0.84387	CM	49
CV76_50	CV76	P42785	PRCP	PRCP	1.87691	CM	50
CV12_51	CV12	P42785	PRCP	PRCP	1.2751	CM	51
C58_52	C58	P42785	PRCP	PRCP	1.26053	CM	52
CV53_53	CV53	P42785	PRCP	PRCP	1.83375	CM	53
CV50_54	CV50	P42785	PRCP	PRCP	1.32254	CM	54
CV32_56	CV32	P42785	PRCP	PRCP	1.06402	CM	56
C197_57	C197	P42785	PRCP	PRCP	0.74983	CM	57
CV18_58	CV18	P42785	PRCP	PRCP	1.4283	CM	58
CV29_59	CV29	P42785	PRCP	PRCP	1.92074	CM	59
CV34_60	CV34	P42785	PRCP	PRCP	1.07391	CM	60
CV41_61	CV41	P42785	PRCP	PRCP	1.20628	CM	61
CV9_62	CV9	P42785	PRCP	PRCP	3.21953	CM	62
CV74_63	CV74	P42785	PRCP	PRCP	1.43348	CM	63
CV16_64	CV16	P42785	PRCP	PRCP	1.2807	CM	64
CV21_1	CV21	P00915	CA1	CA1	6.57032	CM	1
C161_2	C161	P00915	CA1	CA1	6.16524	CM	2
C173_3	C173	P00915	CA1	CA1	6.39401	CM	3
CV11_4	CV11	P00915	CA1	CA1	7.36656	CM	4
CV59_5	CV59	P00915	CA1	CA1	5.98497	CM	5
C193_6	C193	P00915	CA1	CA1	5.74442	CM	6
C33_7	C33	P00915	CA1	CA1	5.5905	CM	7
CV39_8	CV39	P00915	CA1	CA1	6.66191	CM	8
CV6_9	CV6	P00915	CA1	CA1	6.449	CM	9
CV38_10	CV38	P00915	CA1	CA1	5.67168	CM	10
CV4_11	CV4	P00915	CA1	CA1	5.77637	CM	11
C195_12	C195	P00915	CA1	CA1	6.45742	CM	12
CV1_13	CV1	P00915	CA1	CA1	5.2867	CM	13
C237_14	C237	P00915	CA1	CA1	6.44044	CM	14
CV2_15	CV2	P00915	CA1	CA1	5.84365	CM	15
C189_16	C189	P00915	CA1	CA1	5.76806	CM	16
CV42_17	CV42	P00915	CA1	CA1	8.04577	CM	17
CV79_18	CV79	P00915	CA1	CA1	8.14533	CM	18
CV3_19	CV3	P00915	CA1	CA1	4.69849	CM	19
CV36_20	CV36	P00915	CA1	CA1	8.57968	CM	20
CV55_21	CV55	P00915	CA1	CA1	7.94852	CM	21
C246_22	C246	P00915	CA1	CA1	4.86671	CM	22
CV30_23	CV30	P00915	CA1	CA1	6.57624	CM	23
CV19_24	CV19	P00915	CA1	CA1	5.92245	CM	24
CV13_25	CV13	P00915	CA1	CA1	6.85969	CM	25
C137_26	C137	P00915	CA1	CA1	5.04523	CM	26
CV47_27	CV47	P00915	CA1	CA1	6.32463	CM	27
CV29_28	CV29	P00915	CA1	CA1	7.11578	CM	28
CV14_29	CV14	P00915	CA1	CA1	6.35204	CM	29
CV56_30	CV56	P00915	CA1	CA1	7.36454	CM	30
CV82_31	CV82	P00915	CA1	CA1	8.54016	CM	31
CV23_32	CV23	P00915	CA1	CA1	5.34281	CM	32
CV37_33	CV37	P00915	CA1	CA1	7.13124	CM	33
CV34_34	CV34	P00915	CA1	CA1	7.77317	CM	34
CV58_35	CV58	P00915	CA1	CA1	9.83652	CM	35
CV22_36	CV22	P00915	CA1	CA1	6.39831	CM	36
CV65_37	CV65	P00915	CA1	CA1	7.98113	CM	37
CV79_38	CV79	P00915	CA1	CA1	7.75464	CM	38
CV1_39	CV1	P00915	CA1	CA1	7.14357	CM	39
CV51_40	CV51	P00915	CA1	CA1	6.83281	CM	40
CV42_41	CV42	P00915	CA1	CA1	7.11624	CM	41
CV19_42	CV19	P00915	CA1	CA1	8.07764	CM	42
CV70_43	CV70	P00915	CA1	CA1	8.27735	CM	43
C78_44	C78	P00915	CA1	CA1	5.52744	CM	44
CV10_45	CV10	P00915	CA1	CA1	6.00659	CM	45
CV8_46	CV8	P00915	CA1	CA1	5.85522	CM	46
CV60_47	CV60	P00915	CA1	CA1	7.49591	CM	47
CV35_48	CV35	P00915	CA1	CA1	5.46686	CM	48
CV48_49	CV48	P00915	CA1	CA1	5.40244	CM	49
CV76_50	CV76	P00915	CA1	CA1	6.32461	CM	50
CV12_51	CV12	P00915	CA1	CA1	6.06345	CM	51
C58_52	C58	P00915	CA1	CA1	4.58458	CM	52
CV53_53	CV53	P00915	CA1	CA1	7.70968	CM	53
CV50_54	CV50	P00915	CA1	CA1	6.53143	CM	54
CV32_56	CV32	P00915	CA1	CA1	4.72963	CM	56
C197_57	C197	P00915	CA1	CA1	6.45617	CM	57
CV18_58	CV18	P00915	CA1	CA1	6.91987	CM	58
CV29_59	CV29	P00915	CA1	CA1	6.50426	CM	59
CV34_60	CV34	P00915	CA1	CA1	5.19922	CM	60
CV41_61	CV41	P00915	CA1	CA1	6.6918	CM	61
CV9_62	CV9	P00915	CA1	CA1	6.64435	CM	62
CV74_63	CV74	P00915	CA1	CA1	6.32969	CM	63
CV16_64	CV16	P00915	CA1	CA1	5.93207	CM	64
CV21_1	CV21	P05362	ICAM1	ICAM1	8.20547	CM	1
C161_2	C161	P05362	ICAM1	ICAM1	6.25219	CM	2
C173_3	C173	P05362	ICAM1	ICAM1	6.30257	CM	3
CV11_4	CV11	P05362	ICAM1	ICAM1	6.56058	CM	4
CV59_5	CV59	P05362	ICAM1	ICAM1	6.50362	CM	5
C193_6	C193	P05362	ICAM1	ICAM1	5.89084	CM	6
C33_7	C33	P05362	ICAM1	ICAM1	6.12394	CM	7
CV39_8	CV39	P05362	ICAM1	ICAM1	6.92808	CM	8
CV6_9	CV6	P05362	ICAM1	ICAM1	7.25481	CM	9
CV38_10	CV38	P05362	ICAM1	ICAM1	7.02628	CM	10
CV4_11	CV4	P05362	ICAM1	ICAM1	5.92186	CM	11
C195_12	C195	P05362	ICAM1	ICAM1	6.79987	CM	12
CV1_13	CV1	P05362	ICAM1	ICAM1	6.23286	CM	13
C237_14	C237	P05362	ICAM1	ICAM1	6.67515	CM	14
CV2_15	CV2	P05362	ICAM1	ICAM1	6.17069	CM	15
C189_16	C189	P05362	ICAM1	ICAM1	6.91431	CM	16
CV42_17	CV42	P05362	ICAM1	ICAM1	8.45476	CM	17
CV79_18	CV79	P05362	ICAM1	ICAM1	6.6691	CM	18
CV3_19	CV3	P05362	ICAM1	ICAM1	6.23078	CM	19
CV36_20	CV36	P05362	ICAM1	ICAM1	6.78155	CM	20
CV55_21	CV55	P05362	ICAM1	ICAM1	6.31533	CM	21
C246_22	C246	P05362	ICAM1	ICAM1	5.93932	CM	22
CV30_23	CV30	P05362	ICAM1	ICAM1	5.98214	CM	23
CV19_24	CV19	P05362	ICAM1	ICAM1	6.81161	CM	24
CV13_25	CV13	P05362	ICAM1	ICAM1	6.44997	CM	25
C137_26	C137	P05362	ICAM1	ICAM1	6.38919	CM	26
CV47_27	CV47	P05362	ICAM1	ICAM1	7.16804	CM	27
CV29_28	CV29	P05362	ICAM1	ICAM1	6.57946	CM	28
CV14_29	CV14	P05362	ICAM1	ICAM1	6.80715	CM	29
CV56_30	CV56	P05362	ICAM1	ICAM1	7.14624	CM	30
CV82_31	CV82	P05362	ICAM1	ICAM1	6.942	CM	31
CV23_32	CV23	P05362	ICAM1	ICAM1	5.97252	CM	32
CV37_33	CV37	P05362	ICAM1	ICAM1	7.76076	CM	33
CV34_34	CV34	P05362	ICAM1	ICAM1	6.58007	CM	34
CV58_35	CV58	P05362	ICAM1	ICAM1	7.42545	CM	35
CV22_36	CV22	P05362	ICAM1	ICAM1	7.54962	CM	36
CV65_37	CV65	P05362	ICAM1	ICAM1	6.50054	CM	37
CV79_38	CV79	P05362	ICAM1	ICAM1	6.27091	CM	38
CV1_39	CV1	P05362	ICAM1	ICAM1	6.40309	CM	39
CV51_40	CV51	P05362	ICAM1	ICAM1	7.51166	CM	40
CV42_41	CV42	P05362	ICAM1	ICAM1	7.39585	CM	41
CV19_42	CV19	P05362	ICAM1	ICAM1	7.17088	CM	42
CV70_43	CV70	P05362	ICAM1	ICAM1	6.86847	CM	43
C78_44	C78	P05362	ICAM1	ICAM1	8.1015	CM	44
CV10_45	CV10	P05362	ICAM1	ICAM1	6.0453	CM	45
CV8_46	CV8	P05362	ICAM1	ICAM1	6.25168	CM	46
CV60_47	CV60	P05362	ICAM1	ICAM1	7.16345	CM	47
CV35_48	CV35	P05362	ICAM1	ICAM1	7.20667	CM	48
CV48_49	CV48	P05362	ICAM1	ICAM1	7.13111	CM	49
CV76_50	CV76	P05362	ICAM1	ICAM1	7.62019	CM	50
CV12_51	CV12	P05362	ICAM1	ICAM1	6.42372	CM	51
C58_52	C58	P05362	ICAM1	ICAM1	6.42446	CM	52
CV53_53	CV53	P05362	ICAM1	ICAM1	7.57291	CM	53
CV50_54	CV50	P05362	ICAM1	ICAM1	6.76674	CM	54
CV32_56	CV32	P05362	ICAM1	ICAM1	6.20804	CM	56
C197_57	C197	P05362	ICAM1	ICAM1	6.5717	CM	57
CV18_58	CV18	P05362	ICAM1	ICAM1	7.64364	CM	58
CV29_59	CV29	P05362	ICAM1	ICAM1	7.39692	CM	59
CV34_60	CV34	P05362	ICAM1	ICAM1	6.52367	CM	60
CV41_61	CV41	P05362	ICAM1	ICAM1	6.34012	CM	61
CV9_62	CV9	P05362	ICAM1	ICAM1	6.88327	CM	62
CV74_63	CV74	P05362	ICAM1	ICAM1	6.62046	CM	63
CV16_64	CV16	P05362	ICAM1	ICAM1	6.80523	CM	64
CV21_1	CV21	O00533	CHL1	CHL1	3.58556	CM	1
C161_2	C161	O00533	CHL1	CHL1	3.06519	CM	2
C173_3	C173	O00533	CHL1	CHL1	3.05756	CM	3
CV11_4	CV11	O00533	CHL1	CHL1	2.95633	CM	4
CV59_5	CV59	O00533	CHL1	CHL1	2.84895	CM	5
C193_6	C193	O00533	CHL1	CHL1	2.74988	CM	6
C33_7	C33	O00533	CHL1	CHL1	2.77383	CM	7
CV39_8	CV39	O00533	CHL1	CHL1	4.35603	CM	8
CV6_9	CV6	O00533	CHL1	CHL1	4.27962	CM	9
CV38_10	CV38	O00533	CHL1	CHL1	3.49246	CM	10
CV4_11	CV4	O00533	CHL1	CHL1	2.94586	CM	11
C195_12	C195	O00533	CHL1	CHL1	3.34335	CM	12
CV1_13	CV1	O00533	CHL1	CHL1	2.69261	CM	13
C237_14	C237	O00533	CHL1	CHL1	3.09251	CM	14
CV2_15	CV2	O00533	CHL1	CHL1	2.48559	CM	15
C189_16	C189	O00533	CHL1	CHL1	2.79045	CM	16
CV42_17	CV42	O00533	CHL1	CHL1	3.82158	CM	17
CV79_18	CV79	O00533	CHL1	CHL1	3.25357	CM	18
CV3_19	CV3	O00533	CHL1	CHL1	2.69262	CM	19
CV36_20	CV36	O00533	CHL1	CHL1	3.25191	CM	20
CV55_21	CV55	O00533	CHL1	CHL1	3.10574	CM	21
C246_22	C246	O00533	CHL1	CHL1	3.31056	CM	22
CV30_23	CV30	O00533	CHL1	CHL1	2.91488	CM	23
CV19_24	CV19	O00533	CHL1	CHL1	2.66501	CM	24
CV13_25	CV13	O00533	CHL1	CHL1	3.46335	CM	25
C137_26	C137	O00533	CHL1	CHL1	3.20002	CM	26
CV47_27	CV47	O00533	CHL1	CHL1	3.53069	CM	27
CV29_28	CV29	O00533	CHL1	CHL1	3.95868	CM	28
CV14_29	CV14	O00533	CHL1	CHL1	2.82759	CM	29
CV56_30	CV56	O00533	CHL1	CHL1	3.77844	CM	30
CV82_31	CV82	O00533	CHL1	CHL1	2.98991	CM	31
CV23_32	CV23	O00533	CHL1	CHL1	3.28873	CM	32
CV37_33	CV37	O00533	CHL1	CHL1	4.59875	CM	33
CV34_34	CV34	O00533	CHL1	CHL1	4.43965	CM	34
CV58_35	CV58	O00533	CHL1	CHL1	3.40611	CM	35
CV22_36	CV22	O00533	CHL1	CHL1	3.52551	CM	36
CV65_37	CV65	O00533	CHL1	CHL1	3.43487	CM	37
CV79_38	CV79	O00533	CHL1	CHL1	3.13931	CM	38
CV1_39	CV1	O00533	CHL1	CHL1	2.73934	CM	39
CV51_40	CV51	O00533	CHL1	CHL1	3.24763	CM	40
CV42_41	CV42	O00533	CHL1	CHL1	3.80041	CM	41
CV19_42	CV19	O00533	CHL1	CHL1	3.12758	CM	42
CV70_43	CV70	O00533	CHL1	CHL1	3.9587	CM	43
C78_44	C78	O00533	CHL1	CHL1	3.66053	CM	44
CV10_45	CV10	O00533	CHL1	CHL1	4.08773	CM	45
CV8_46	CV8	O00533	CHL1	CHL1	2.88739	CM	46
CV60_47	CV60	O00533	CHL1	CHL1	3.40674	CM	47
CV35_48	CV35	O00533	CHL1	CHL1	3.6389	CM	48
CV48_49	CV48	O00533	CHL1	CHL1	3.77981	CM	49
CV76_50	CV76	O00533	CHL1	CHL1	3.45484	CM	50
CV12_51	CV12	O00533	CHL1	CHL1	3.06313	CM	51
C58_52	C58	O00533	CHL1	CHL1	3.15025	CM	52
CV53_53	CV53	O00533	CHL1	CHL1	3.59699	CM	53
CV50_54	CV50	O00533	CHL1	CHL1	3.3311	CM	54
CV32_56	CV32	O00533	CHL1	CHL1	3.02252	CM	56
C197_57	C197	O00533	CHL1	CHL1	3.54878	CM	57
CV18_58	CV18	O00533	CHL1	CHL1	3.37839	CM	58
CV29_59	CV29	O00533	CHL1	CHL1	3.07055	CM	59
CV34_60	CV34	O00533	CHL1	CHL1	4.31387	CM	60
CV41_61	CV41	O00533	CHL1	CHL1	3.21505	CM	61
CV9_62	CV9	O00533	CHL1	CHL1	3.22963	CM	62
CV74_63	CV74	O00533	CHL1	CHL1	3.8143	CM	63
CV16_64	CV16	O00533	CHL1	CHL1	3.07195	CM	64
CV21_1	CV21	Q15582	TGFBI	TGFBI	10.14807	CM	1
C161_2	C161	Q15582	TGFBI	TGFBI	8.45201	CM	2
C173_3	C173	Q15582	TGFBI	TGFBI	8.82712	CM	3
CV11_4	CV11	Q15582	TGFBI	TGFBI	8.8792	CM	4
CV59_5	CV59	Q15582	TGFBI	TGFBI	7.52403	CM	5
C193_6	C193	Q15582	TGFBI	TGFBI	7.4501	CM	6
C33_7	C33	Q15582	TGFBI	TGFBI	8.06115	CM	7
CV39_8	CV39	Q15582	TGFBI	TGFBI	9.47123	CM	8
CV6_9	CV6	Q15582	TGFBI	TGFBI	9.06022	CM	9
CV38_10	CV38	Q15582	TGFBI	TGFBI	9.68252	CM	10
CV4_11	CV4	Q15582	TGFBI	TGFBI	9.39204	CM	11
C195_12	C195	Q15582	TGFBI	TGFBI	7.96463	CM	12
CV1_13	CV1	Q15582	TGFBI	TGFBI	8.05197	CM	13
C237_14	C237	Q15582	TGFBI	TGFBI	8.381	CM	14
CV2_15	CV2	Q15582	TGFBI	TGFBI	8.15619	CM	15
C189_16	C189	Q15582	TGFBI	TGFBI	8.76601	CM	16
CV42_17	CV42	Q15582	TGFBI	TGFBI	10.12825	CM	17
CV79_18	CV79	Q15582	TGFBI	TGFBI	8.66773	CM	18
CV3_19	CV3	Q15582	TGFBI	TGFBI	7.69904	CM	19
CV36_20	CV36	Q15582	TGFBI	TGFBI	9.38521	CM	20
CV55_21	CV55	Q15582	TGFBI	TGFBI	8.56998	CM	21
C246_22	C246	Q15582	TGFBI	TGFBI	7.93262	CM	22
CV30_23	CV30	Q15582	TGFBI	TGFBI	8.20691	CM	23
CV19_24	CV19	Q15582	TGFBI	TGFBI	9.40835	CM	24
CV13_25	CV13	Q15582	TGFBI	TGFBI	8.62233	CM	25
C137_26	C137	Q15582	TGFBI	TGFBI	7.8962	CM	26
CV47_27	CV47	Q15582	TGFBI	TGFBI	9.32221	CM	27
CV29_28	CV29	Q15582	TGFBI	TGFBI	8.85648	CM	28
CV14_29	CV14	Q15582	TGFBI	TGFBI	8.02327	CM	29
CV56_30	CV56	Q15582	TGFBI	TGFBI	9.04729	CM	30
CV82_31	CV82	Q15582	TGFBI	TGFBI	10.06338	CM	31
CV23_32	CV23	Q15582	TGFBI	TGFBI	8.11939	CM	32
CV37_33	CV37	Q15582	TGFBI	TGFBI	9.84896	CM	33
CV34_34	CV34	Q15582	TGFBI	TGFBI	9.20787	CM	34
CV58_35	CV58	Q15582	TGFBI	TGFBI	9.4043	CM	35
CV22_36	CV22	Q15582	TGFBI	TGFBI	9.81923	CM	36
CV65_37	CV65	Q15582	TGFBI	TGFBI	8.86884	CM	37
CV79_38	CV79	Q15582	TGFBI	TGFBI	8.10816	CM	38
CV1_39	CV1	Q15582	TGFBI	TGFBI	8.78877	CM	39
CV51_40	CV51	Q15582	TGFBI	TGFBI	8.88181	CM	40
CV42_41	CV42	Q15582	TGFBI	TGFBI	10.13791	CM	41
CV19_42	CV19	Q15582	TGFBI	TGFBI	9.912	CM	42
CV70_43	CV70	Q15582	TGFBI	TGFBI	9.09478	CM	43
C78_44	C78	Q15582	TGFBI	TGFBI	9.5558	CM	44
CV10_45	CV10	Q15582	TGFBI	TGFBI	8.348	CM	45
CV8_46	CV8	Q15582	TGFBI	TGFBI	7.70482	CM	46
CV60_47	CV60	Q15582	TGFBI	TGFBI	9.47459	CM	47
CV35_48	CV35	Q15582	TGFBI	TGFBI	9.53066	CM	48
CV48_49	CV48	Q15582	TGFBI	TGFBI	9.67943	CM	49
CV76_50	CV76	Q15582	TGFBI	TGFBI	9.14109	CM	50
CV12_51	CV12	Q15582	TGFBI	TGFBI	9.7537	CM	51
C58_52	C58	Q15582	TGFBI	TGFBI	8.87737	CM	52
CV53_53	CV53	Q15582	TGFBI	TGFBI	9.3698	CM	53
CV50_54	CV50	Q15582	TGFBI	TGFBI	8.58748	CM	54
CV32_56	CV32	Q15582	TGFBI	TGFBI	8.538	CM	56
C197_57	C197	Q15582	TGFBI	TGFBI	8.21801	CM	57
CV18_58	CV18	Q15582	TGFBI	TGFBI	8.4083	CM	58
CV29_59	CV29	Q15582	TGFBI	TGFBI	9.96087	CM	59
CV34_60	CV34	Q15582	TGFBI	TGFBI	9.26558	CM	60
CV41_61	CV41	Q15582	TGFBI	TGFBI	8.73666	CM	61
CV9_62	CV9	Q15582	TGFBI	TGFBI	8.96835	CM	62
CV74_63	CV74	Q15582	TGFBI	TGFBI	8.69304	CM	63
CV16_64	CV16	Q15582	TGFBI	TGFBI	8.29587	CM	64
CV21_1	CV21	P17813	ENG	ENG	1.97061	CM	1
C161_2	C161	P17813	ENG	ENG	1.73362	CM	2
C173_3	C173	P17813	ENG	ENG	2.03371	CM	3
CV11_4	CV11	P17813	ENG	ENG	1.49278	CM	4
CV59_5	CV59	P17813	ENG	ENG	1.44964	CM	5
C193_6	C193	P17813	ENG	ENG	1.13687	CM	6
C33_7	C33	P17813	ENG	ENG	1.40747	CM	7
CV39_8	CV39	P17813	ENG	ENG	1.51162	CM	8
CV6_9	CV6	P17813	ENG	ENG	1.99272	CM	9
CV38_10	CV38	P17813	ENG	ENG	1.80462	CM	10
CV4_11	CV4	P17813	ENG	ENG	1.46294	CM	11
C195_12	C195	P17813	ENG	ENG	1.77089	CM	12
CV1_13	CV1	P17813	ENG	ENG	1.53449	CM	13
C237_14	C237	P17813	ENG	ENG	1.46289	CM	14
CV2_15	CV2	P17813	ENG	ENG	1.40601	CM	15
C189_16	C189	P17813	ENG	ENG	1.41845	CM	16
CV42_17	CV42	P17813	ENG	ENG	2.14309	CM	17
CV79_18	CV79	P17813	ENG	ENG	1.49656	CM	18
CV3_19	CV3	P17813	ENG	ENG	1.46727	CM	19
CV36_20	CV36	P17813	ENG	ENG	1.98758	CM	20
CV55_21	CV55	P17813	ENG	ENG	1.60249	CM	21
C246_22	C246	P17813	ENG	ENG	1.50829	CM	22
CV30_23	CV30	P17813	ENG	ENG	1.38257	CM	23
CV19_24	CV19	P17813	ENG	ENG	1.55348	CM	24
CV13_25	CV13	P17813	ENG	ENG	1.36071	CM	25
C137_26	C137	P17813	ENG	ENG	1.58563	CM	26
CV47_27	CV47	P17813	ENG	ENG	2.13268	CM	27
CV29_28	CV29	P17813	ENG	ENG	1.97705	CM	28
CV14_29	CV14	P17813	ENG	ENG	1.61645	CM	29
CV56_30	CV56	P17813	ENG	ENG	2.25787	CM	30
CV82_31	CV82	P17813	ENG	ENG	1.60766	CM	31
CV23_32	CV23	P17813	ENG	ENG	1.49991	CM	32
CV37_33	CV37	P17813	ENG	ENG	2.48115	CM	33
CV34_34	CV34	P17813	ENG	ENG	1.78705	CM	34
CV58_35	CV58	P17813	ENG	ENG	2.11261	CM	35
CV22_36	CV22	P17813	ENG	ENG	2.43131	CM	36
CV65_37	CV65	P17813	ENG	ENG	1.73691	CM	37
CV79_38	CV79	P17813	ENG	ENG	1.35135	CM	38
CV1_39	CV1	P17813	ENG	ENG	1.3927	CM	39
CV51_40	CV51	P17813	ENG	ENG	1.5462	CM	40
CV42_41	CV42	P17813	ENG	ENG	2.43601	CM	41
CV19_42	CV19	P17813	ENG	ENG	2.02905	CM	42
CV70_43	CV70	P17813	ENG	ENG	1.96522	CM	43
C78_44	C78	P17813	ENG	ENG	2.12431	CM	44
CV10_45	CV10	P17813	ENG	ENG	1.28962	CM	45
CV8_46	CV8	P17813	ENG	ENG	1.11268	CM	46
CV60_47	CV60	P17813	ENG	ENG	1.9688	CM	47
CV35_48	CV35	P17813	ENG	ENG	1.90728	CM	48
CV48_49	CV48	P17813	ENG	ENG	1.75961	CM	49
CV76_50	CV76	P17813	ENG	ENG	2.00694	CM	50
CV12_51	CV12	P17813	ENG	ENG	1.72057	CM	51
C58_52	C58	P17813	ENG	ENG	1.63136	CM	52
CV53_53	CV53	P17813	ENG	ENG	2.10896	CM	53
CV50_54	CV50	P17813	ENG	ENG	1.77119	CM	54
CV32_56	CV32	P17813	ENG	ENG	1.4034	CM	56
C197_57	C197	P17813	ENG	ENG	1.86474	CM	57
CV18_58	CV18	P17813	ENG	ENG	1.82637	CM	58
CV29_59	CV29	P17813	ENG	ENG	2.05448	CM	59
CV34_60	CV34	P17813	ENG	ENG	1.76174	CM	60
CV41_61	CV41	P17813	ENG	ENG	1.84528	CM	61
CV9_62	CV9	P17813	ENG	ENG	1.76781	CM	62
CV74_63	CV74	P17813	ENG	ENG	2.00132	CM	63
CV16_64	CV16	P17813	ENG	ENG	1.58401	CM	64
CV21_1	CV21	P55058	PLTP	PLTP	1.52198	CM	1
C161_2	C161	P55058	PLTP	PLTP	1.68458	CM	2
C173_3	C173	P55058	PLTP	PLTP	1.94061	CM	3
CV11_4	CV11	P55058	PLTP	PLTP	1.75497	CM	4
CV59_5	CV59	P55058	PLTP	PLTP	1.67465	CM	5
C193_6	C193	P55058	PLTP	PLTP	2.06283	CM	6
C33_7	C33	P55058	PLTP	PLTP	1.86112	CM	7
CV39_8	CV39	P55058	PLTP	PLTP	1.90215	CM	8
CV6_9	CV6	P55058	PLTP	PLTP	1.98562	CM	9
CV38_10	CV38	P55058	PLTP	PLTP	1.61488	CM	10
CV4_11	CV4	P55058	PLTP	PLTP	1.63052	CM	11
C195_12	C195	P55058	PLTP	PLTP	2.43018	CM	12
CV1_13	CV1	P55058	PLTP	PLTP	1.66018	CM	13
C237_14	C237	P55058	PLTP	PLTP	1.56402	CM	14
CV2_15	CV2	P55058	PLTP	PLTP	0.91966	CM	15
C189_16	C189	P55058	PLTP	PLTP	1.84861	CM	16
CV42_17	CV42	P55058	PLTP	PLTP	1.72289	CM	17
CV79_18	CV79	P55058	PLTP	PLTP	1.69584	CM	18
CV3_19	CV3	P55058	PLTP	PLTP	1.7983	CM	19
CV36_20	CV36	P55058	PLTP	PLTP	1.52566	CM	20
CV55_21	CV55	P55058	PLTP	PLTP	1.40416	CM	21
C246_22	C246	P55058	PLTP	PLTP	1.75899	CM	22
CV30_23	CV30	P55058	PLTP	PLTP	1.28545	CM	23
CV19_24	CV19	P55058	PLTP	PLTP	1.15197	CM	24
CV13_25	CV13	P55058	PLTP	PLTP	2.17132	CM	25
C137_26	C137	P55058	PLTP	PLTP	1.90648	CM	26
CV47_27	CV47	P55058	PLTP	PLTP	1.58111	CM	27
CV29_28	CV29	P55058	PLTP	PLTP	2.73464	CM	28
CV14_29	CV14	P55058	PLTP	PLTP	2.05874	CM	29
CV56_30	CV56	P55058	PLTP	PLTP	2.1092	CM	30
CV82_31	CV82	P55058	PLTP	PLTP	1.66581	CM	31
CV23_32	CV23	P55058	PLTP	PLTP	1.84161	CM	32
CV37_33	CV37	P55058	PLTP	PLTP	2.49782	CM	33
CV34_34	CV34	P55058	PLTP	PLTP	1.68106	CM	34
CV58_35	CV58	P55058	PLTP	PLTP	2.42857	CM	35
CV22_36	CV22	P55058	PLTP	PLTP	2.08174	CM	36
CV65_37	CV65	P55058	PLTP	PLTP	2.93803	CM	37
CV79_38	CV79	P55058	PLTP	PLTP	1.5813	CM	38
CV1_39	CV1	P55058	PLTP	PLTP	1.40796	CM	39
CV51_40	CV51	P55058	PLTP	PLTP	1.33756	CM	40
CV42_41	CV42	P55058	PLTP	PLTP	1.88582	CM	41
CV19_42	CV19	P55058	PLTP	PLTP	2.09284	CM	42
CV70_43	CV70	P55058	PLTP	PLTP	1.54703	CM	43
C78_44	C78	P55058	PLTP	PLTP	2.45276	CM	44
CV10_45	CV10	P55058	PLTP	PLTP	1.84905	CM	45
CV8_46	CV8	P55058	PLTP	PLTP	1.85378	CM	46
CV60_47	CV60	P55058	PLTP	PLTP	1.45359	CM	47
CV35_48	CV35	P55058	PLTP	PLTP	1.60408	CM	48
CV48_49	CV48	P55058	PLTP	PLTP	1.30119	CM	49
CV76_50	CV76	P55058	PLTP	PLTP	2.81178	CM	50
CV12_51	CV12	P55058	PLTP	PLTP	1.64598	CM	51
C58_52	C58	P55058	PLTP	PLTP	1.93832	CM	52
CV53_53	CV53	P55058	PLTP	PLTP	1.98567	CM	53
CV50_54	CV50	P55058	PLTP	PLTP	2.30608	CM	54
CV32_56	CV32	P55058	PLTP	PLTP	1.83593	CM	56
C197_57	C197	P55058	PLTP	PLTP	2.40147	CM	57
CV18_58	CV18	P55058	PLTP	PLTP	2.08484	CM	58
CV29_59	CV29	P55058	PLTP	PLTP	2.03316	CM	59
CV34_60	CV34	P55058	PLTP	PLTP	2.01557	CM	60
CV41_61	CV41	P55058	PLTP	PLTP	1.77713	CM	61
CV9_62	CV9	P55058	PLTP	PLTP	1.87956	CM	62
CV74_63	CV74	P55058	PLTP	PLTP	1.85835	CM	63
CV16_64	CV16	P55058	PLTP	PLTP	2.21235	CM	64
CV21_1	CV21	P05543	SERPINA7	SERPINA7	4.75153	CM	1
C161_2	C161	P05543	SERPINA7	SERPINA7	5.46551	CM	2
C173_3	C173	P05543	SERPINA7	SERPINA7	4.5216	CM	3
CV11_4	CV11	P05543	SERPINA7	SERPINA7	4.2208	CM	4
CV59_5	CV59	P05543	SERPINA7	SERPINA7	4.27488	CM	5
C193_6	C193	P05543	SERPINA7	SERPINA7	4.48272	CM	6
C33_7	C33	P05543	SERPINA7	SERPINA7	4.21356	CM	7
CV39_8	CV39	P05543	SERPINA7	SERPINA7	5.2428	CM	8
CV6_9	CV6	P05543	SERPINA7	SERPINA7	4.20257	CM	9
CV38_10	CV38	P05543	SERPINA7	SERPINA7	5.37251	CM	10
CV4_11	CV4	P05543	SERPINA7	SERPINA7	4.3557	CM	11
C195_12	C195	P05543	SERPINA7	SERPINA7	4.2918	CM	12
CV1_13	CV1	P05543	SERPINA7	SERPINA7	4.58265	CM	13
C237_14	C237	P05543	SERPINA7	SERPINA7	3.97717	CM	14
CV2_15	CV2	P05543	SERPINA7	SERPINA7	4.14925	CM	15
C189_16	C189	P05543	SERPINA7	SERPINA7	5.05006	CM	16
CV42_17	CV42	P05543	SERPINA7	SERPINA7	5.30343	CM	17
CV79_18	CV79	P05543	SERPINA7	SERPINA7	4.4536	CM	18
CV3_19	CV3	P05543	SERPINA7	SERPINA7	4.26171	CM	19
CV36_20	CV36	P05543	SERPINA7	SERPINA7	5.19755	CM	20
CV55_21	CV55	P05543	SERPINA7	SERPINA7	4.77937	CM	21
C246_22	C246	P05543	SERPINA7	SERPINA7	4.15121	CM	22
CV30_23	CV30	P05543	SERPINA7	SERPINA7	4.41813	CM	23
CV19_24	CV19	P05543	SERPINA7	SERPINA7	4.10537	CM	24
CV13_25	CV13	P05543	SERPINA7	SERPINA7	5.06936	CM	25
C137_26	C137	P05543	SERPINA7	SERPINA7	5.18382	CM	26
CV47_27	CV47	P05543	SERPINA7	SERPINA7	4.6122	CM	27
CV29_28	CV29	P05543	SERPINA7	SERPINA7	4.46778	CM	28
CV14_29	CV14	P05543	SERPINA7	SERPINA7	3.44273	CM	29
CV56_30	CV56	P05543	SERPINA7	SERPINA7	4.84623	CM	30
CV82_31	CV82	P05543	SERPINA7	SERPINA7	5.42696	CM	31
CV23_32	CV23	P05543	SERPINA7	SERPINA7	5.08013	CM	32
CV37_33	CV37	P05543	SERPINA7	SERPINA7	5.3176	CM	33
CV34_34	CV34	P05543	SERPINA7	SERPINA7	5.22148	CM	34
CV58_35	CV58	P05543	SERPINA7	SERPINA7	5.19536	CM	35
CV22_36	CV22	P05543	SERPINA7	SERPINA7	5.30671	CM	36
CV65_37	CV65	P05543	SERPINA7	SERPINA7	4.67551	CM	37
CV79_38	CV79	P05543	SERPINA7	SERPINA7	4.12773	CM	38
CV1_39	CV1	P05543	SERPINA7	SERPINA7	4.6438	CM	39
CV51_40	CV51	P05543	SERPINA7	SERPINA7	4.74907	CM	40
CV42_41	CV42	P05543	SERPINA7	SERPINA7	5.14289	CM	41
CV19_42	CV19	P05543	SERPINA7	SERPINA7	4.73882	CM	42
CV70_43	CV70	P05543	SERPINA7	SERPINA7	5.13452	CM	43
C78_44	C78	P05543	SERPINA7	SERPINA7	4.79642	CM	44
CV10_45	CV10	P05543	SERPINA7	SERPINA7	4.21621	CM	45
CV8_46	CV8	P05543	SERPINA7	SERPINA7	3.45754	CM	46
CV60_47	CV60	P05543	SERPINA7	SERPINA7	4.82186	CM	47
CV35_48	CV35	P05543	SERPINA7	SERPINA7	5.16446	CM	48
CV48_49	CV48	P05543	SERPINA7	SERPINA7	4.79465	CM	49
CV76_50	CV76	P05543	SERPINA7	SERPINA7	4.64119	CM	50
CV12_51	CV12	P05543	SERPINA7	SERPINA7	4.85856	CM	51
C58_52	C58	P05543	SERPINA7	SERPINA7	5.20165	CM	52
CV53_53	CV53	P05543	SERPINA7	SERPINA7	5.32726	CM	53
CV50_54	CV50	P05543	SERPINA7	SERPINA7	5.4476	CM	54
CV32_56	CV32	P05543	SERPINA7	SERPINA7	4.37766	CM	56
C197_57	C197	P05543	SERPINA7	SERPINA7	4.48734	CM	57
CV18_58	CV18	P05543	SERPINA7	SERPINA7	4.90117	CM	58
CV29_59	CV29	P05543	SERPINA7	SERPINA7	4.84614	CM	59
CV34_60	CV34	P05543	SERPINA7	SERPINA7	5.13126	CM	60
CV41_61	CV41	P05543	SERPINA7	SERPINA7	4.16886	CM	61
CV9_62	CV9	P05543	SERPINA7	SERPINA7	4.90206	CM	62
CV74_63	CV74	P05543	SERPINA7	SERPINA7	4.53311	CM	63
CV16_64	CV16	P05543	SERPINA7	SERPINA7	4.36521	CM	64
CV21_1	CV21	P17936	IGFBP3	IGFBP3	2.93839	CM	1
C161_2	C161	P17936	IGFBP3	IGFBP3	5.09488	CM	2
C173_3	C173	P17936	IGFBP3	IGFBP3	3.78181	CM	3
CV11_4	CV11	P17936	IGFBP3	IGFBP3	2.97361	CM	4
CV59_5	CV59	P17936	IGFBP3	IGFBP3	2.92974	CM	5
C193_6	C193	P17936	IGFBP3	IGFBP3	4.13948	CM	6
C33_7	C33	P17936	IGFBP3	IGFBP3	3.43927	CM	7
CV39_8	CV39	P17936	IGFBP3	IGFBP3	4.00479	CM	8
CV6_9	CV6	P17936	IGFBP3	IGFBP3	4.55919	CM	9
CV38_10	CV38	P17936	IGFBP3	IGFBP3	4.26691	CM	10
CV4_11	CV4	P17936	IGFBP3	IGFBP3	3.8372	CM	11
C195_12	C195	P17936	IGFBP3	IGFBP3	3.49057	CM	12
CV1_13	CV1	P17936	IGFBP3	IGFBP3	2.8842	CM	13
C237_14	C237	P17936	IGFBP3	IGFBP3	3.0335	CM	14
CV2_15	CV2	P17936	IGFBP3	IGFBP3	3.09383	CM	15
C189_16	C189	P17936	IGFBP3	IGFBP3	4.50654	CM	16
CV42_17	CV42	P17936	IGFBP3	IGFBP3	5.21454	CM	17
CV79_18	CV79	P17936	IGFBP3	IGFBP3	4.11719	CM	18
CV3_19	CV3	P17936	IGFBP3	IGFBP3	4.06124	CM	19
CV36_20	CV36	P17936	IGFBP3	IGFBP3	4.21989	CM	20
CV55_21	CV55	P17936	IGFBP3	IGFBP3	4.35278	CM	21
C246_22	C246	P17936	IGFBP3	IGFBP3	4.08062	CM	22
CV30_23	CV30	P17936	IGFBP3	IGFBP3	4.04671	CM	23
CV19_24	CV19	P17936	IGFBP3	IGFBP3	4.63721	CM	24
CV13_25	CV13	P17936	IGFBP3	IGFBP3	4.6822	CM	25
C137_26	C137	P17936	IGFBP3	IGFBP3	4.69612	CM	26
CV47_27	CV47	P17936	IGFBP3	IGFBP3	3.73194	CM	27
CV29_28	CV29	P17936	IGFBP3	IGFBP3	4.19445	CM	28
CV14_29	CV14	P17936	IGFBP3	IGFBP3	3.27468	CM	29
CV56_30	CV56	P17936	IGFBP3	IGFBP3	3.11814	CM	30
CV82_31	CV82	P17936	IGFBP3	IGFBP3	5.36637	CM	31
CV23_32	CV23	P17936	IGFBP3	IGFBP3	4.44756	CM	32
CV37_33	CV37	P17936	IGFBP3	IGFBP3	4.49561	CM	33
CV34_34	CV34	P17936	IGFBP3	IGFBP3	4.0494	CM	34
CV58_35	CV58	P17936	IGFBP3	IGFBP3	4.93845	CM	35
CV22_36	CV22	P17936	IGFBP3	IGFBP3	4.32532	CM	36
CV65_37	CV65	P17936	IGFBP3	IGFBP3	4.25014	CM	37
CV79_38	CV79	P17936	IGFBP3	IGFBP3	3.62072	CM	38
CV1_39	CV1	P17936	IGFBP3	IGFBP3	2.09004	CM	39
CV51_40	CV51	P17936	IGFBP3	IGFBP3	3.52977	CM	40
CV42_41	CV42	P17936	IGFBP3	IGFBP3	5.22794	CM	41
CV19_42	CV19	P17936	IGFBP3	IGFBP3	5.12903	CM	42
CV70_43	CV70	P17936	IGFBP3	IGFBP3	3.93317	CM	43
C78_44	C78	P17936	IGFBP3	IGFBP3	3.29238	CM	44
CV10_45	CV10	P17936	IGFBP3	IGFBP3	3.56169	CM	45
CV8_46	CV8	P17936	IGFBP3	IGFBP3	2.43887	CM	46
CV60_47	CV60	P17936	IGFBP3	IGFBP3	3.82375	CM	47
CV35_48	CV35	P17936	IGFBP3	IGFBP3	4.08445	CM	48
CV48_49	CV48	P17936	IGFBP3	IGFBP3	3.53027	CM	49
CV76_50	CV76	P17936	IGFBP3	IGFBP3	4.19259	CM	50
CV12_51	CV12	P17936	IGFBP3	IGFBP3	4.30879	CM	51
C58_52	C58	P17936	IGFBP3	IGFBP3	4.49737	CM	52
CV53_53	CV53	P17936	IGFBP3	IGFBP3	3.99156	CM	53
CV50_54	CV50	P17936	IGFBP3	IGFBP3	3.88238	CM	54
CV32_56	CV32	P17936	IGFBP3	IGFBP3	3.55257	CM	56
C197_57	C197	P17936	IGFBP3	IGFBP3	4.99646	CM	57
CV18_58	CV18	P17936	IGFBP3	IGFBP3	3.57357	CM	58
CV29_59	CV29	P17936	IGFBP3	IGFBP3	5.17696	CM	59
CV34_60	CV34	P17936	IGFBP3	IGFBP3	3.99499	CM	60
CV41_61	CV41	P17936	IGFBP3	IGFBP3	4.36789	CM	61
CV9_62	CV9	P17936	IGFBP3	IGFBP3	3.63158	CM	62
CV74_63	CV74	P17936	IGFBP3	IGFBP3	3.20996	CM	63
CV16_64	CV16	P17936	IGFBP3	IGFBP3	3.14451	CM	64
CV21_1	CV21	P20023	CR2	CR2	6.22545	CM	1
C161_2	C161	P20023	CR2	CR2	6.07494	CM	2
C173_3	C173	P20023	CR2	CR2	7.68574	CM	3
CV11_4	CV11	P20023	CR2	CR2	5.96983	CM	4
CV59_5	CV59	P20023	CR2	CR2	6.08675	CM	5
C193_6	C193	P20023	CR2	CR2	6.48006	CM	6
C33_7	C33	P20023	CR2	CR2	5.10216	CM	7
CV39_8	CV39	P20023	CR2	CR2	5.76056	CM	8
CV6_9	CV6	P20023	CR2	CR2	7.169	CM	9
CV38_10	CV38	P20023	CR2	CR2	6.27075	CM	10
CV4_11	CV4	P20023	CR2	CR2	4.95655	CM	11
C195_12	C195	P20023	CR2	CR2	5.6902	CM	12
CV1_13	CV1	P20023	CR2	CR2	5.62585	CM	13
C237_14	C237	P20023	CR2	CR2	6.51687	CM	14
CV2_15	CV2	P20023	CR2	CR2	4.08818	CM	15
C189_16	C189	P20023	CR2	CR2	7.60108	CM	16
CV42_17	CV42	P20023	CR2	CR2	5.88839	CM	17
CV79_18	CV79	P20023	CR2	CR2	5.25968	CM	18
CV3_19	CV3	P20023	CR2	CR2	5.92176	CM	19
CV36_20	CV36	P20023	CR2	CR2	7.32059	CM	20
CV55_21	CV55	P20023	CR2	CR2	6.86095	CM	21
C246_22	C246	P20023	CR2	CR2	6.52158	CM	22
CV30_23	CV30	P20023	CR2	CR2	6.58309	CM	23
CV19_24	CV19	P20023	CR2	CR2	5.07105	CM	24
CV13_25	CV13	P20023	CR2	CR2	6.68617	CM	25
C137_26	C137	P20023	CR2	CR2	6.78881	CM	26
CV47_27	CV47	P20023	CR2	CR2	5.88847	CM	27
CV29_28	CV29	P20023	CR2	CR2	5.2636	CM	28
CV14_29	CV14	P20023	CR2	CR2	5.5311	CM	29
CV56_30	CV56	P20023	CR2	CR2	8.55049	CM	30
CV82_31	CV82	P20023	CR2	CR2	6.03168	CM	31
CV23_32	CV23	P20023	CR2	CR2	6.2011	CM	32
CV37_33	CV37	P20023	CR2	CR2	7.71931	CM	33
CV34_34	CV34	P20023	CR2	CR2	5.78306	CM	34
CV58_35	CV58	P20023	CR2	CR2	5.96339	CM	35
CV22_36	CV22	P20023	CR2	CR2	5.63006	CM	36
CV65_37	CV65	P20023	CR2	CR2	7.12937	CM	37
CV79_38	CV79	P20023	CR2	CR2	4.95245	CM	38
CV1_39	CV1	P20023	CR2	CR2	5.30597	CM	39
CV51_40	CV51	P20023	CR2	CR2	6.69601	CM	40
CV42_41	CV42	P20023	CR2	CR2	5.47113	CM	41
CV19_42	CV19	P20023	CR2	CR2	5.78693	CM	42
CV70_43	CV70	P20023	CR2	CR2	5.95194	CM	43
C78_44	C78	P20023	CR2	CR2	5.61567	CM	44
CV10_45	CV10	P20023	CR2	CR2	6.81442	CM	45
CV8_46	CV8	P20023	CR2	CR2	5.95408	CM	46
CV60_47	CV60	P20023	CR2	CR2	5.64496	CM	47
CV35_48	CV35	P20023	CR2	CR2	4.56791	CM	48
CV48_49	CV48	P20023	CR2	CR2	6.32745	CM	49
CV76_50	CV76	P20023	CR2	CR2	6.57976	CM	50
CV12_51	CV12	P20023	CR2	CR2	6.39708	CM	51
C58_52	C58	P20023	CR2	CR2	6.40156	CM	52
CV53_53	CV53	P20023	CR2	CR2	6.17507	CM	53
CV50_54	CV50	P20023	CR2	CR2	5.14828	CM	54
CV32_56	CV32	P20023	CR2	CR2	3.47183	CM	56
C197_57	C197	P20023	CR2	CR2	7.21862	CM	57
CV18_58	CV18	P20023	CR2	CR2	6.42218	CM	58
CV29_59	CV29	P20023	CR2	CR2	5.6005	CM	59
CV34_60	CV34	P20023	CR2	CR2	5.55664	CM	60
CV41_61	CV41	P20023	CR2	CR2	6.22087	CM	61
CV9_62	CV9	P20023	CR2	CR2	5.92702	CM	62
CV74_63	CV74	P20023	CR2	CR2	5.32569	CM	63
CV16_64	CV16	P20023	CR2	CR2	5.60035	CM	64
CV21_1	CV21	P05154	SERPINA5	SERPINA5	7.13013	CM	1
C161_2	C161	P05154	SERPINA5	SERPINA5	8.18871	CM	2
C173_3	C173	P05154	SERPINA5	SERPINA5	8.37639	CM	3
CV11_4	CV11	P05154	SERPINA5	SERPINA5	6.4164	CM	4
CV59_5	CV59	P05154	SERPINA5	SERPINA5	5.55105	CM	5
C193_6	C193	P05154	SERPINA5	SERPINA5	7.77571	CM	6
C33_7	C33	P05154	SERPINA5	SERPINA5	7.85182	CM	7
CV39_8	CV39	P05154	SERPINA5	SERPINA5	5.51478	CM	8
CV6_9	CV6	P05154	SERPINA5	SERPINA5	7.72834	CM	9
CV38_10	CV38	P05154	SERPINA5	SERPINA5	7.32499	CM	10
CV4_11	CV4	P05154	SERPINA5	SERPINA5	6.874	CM	11
C195_12	C195	P05154	SERPINA5	SERPINA5	7.90683	CM	12
CV1_13	CV1	P05154	SERPINA5	SERPINA5	5.84452	CM	13
C237_14	C237	P05154	SERPINA5	SERPINA5	7.55854	CM	14
CV2_15	CV2	P05154	SERPINA5	SERPINA5	6.32283	CM	15
C189_16	C189	P05154	SERPINA5	SERPINA5	7.87624	CM	16
CV42_17	CV42	P05154	SERPINA5	SERPINA5	6.93528	CM	17
CV79_18	CV79	P05154	SERPINA5	SERPINA5	7.09292	CM	18
CV3_19	CV3	P05154	SERPINA5	SERPINA5	7.18987	CM	19
CV36_20	CV36	P05154	SERPINA5	SERPINA5	7.89232	CM	20
CV55_21	CV55	P05154	SERPINA5	SERPINA5	7.30485	CM	21
C246_22	C246	P05154	SERPINA5	SERPINA5	8.00352	CM	22
CV30_23	CV30	P05154	SERPINA5	SERPINA5	6.96973	CM	23
CV19_24	CV19	P05154	SERPINA5	SERPINA5	6.59368	CM	24
CV13_25	CV13	P05154	SERPINA5	SERPINA5	7.23858	CM	25
C137_26	C137	P05154	SERPINA5	SERPINA5	8.43879	CM	26
CV47_27	CV47	P05154	SERPINA5	SERPINA5	6.56319	CM	27
CV29_28	CV29	P05154	SERPINA5	SERPINA5	7.36965	CM	28
CV14_29	CV14	P05154	SERPINA5	SERPINA5	4.60139	CM	29
CV56_30	CV56	P05154	SERPINA5	SERPINA5	7.82191	CM	30
CV82_31	CV82	P05154	SERPINA5	SERPINA5	7.73905	CM	31
CV23_32	CV23	P05154	SERPINA5	SERPINA5	7.95319	CM	32
CV37_33	CV37	P05154	SERPINA5	SERPINA5	7.99229	CM	33
CV34_34	CV34	P05154	SERPINA5	SERPINA5	7.57429	CM	34
CV58_35	CV58	P05154	SERPINA5	SERPINA5	8.90526	CM	35
CV22_36	CV22	P05154	SERPINA5	SERPINA5	5.78129	CM	36
CV65_37	CV65	P05154	SERPINA5	SERPINA5	6.39819	CM	37
CV79_38	CV79	P05154	SERPINA5	SERPINA5	6.5817	CM	38
CV1_39	CV1	P05154	SERPINA5	SERPINA5	7.11502	CM	39
CV51_40	CV51	P05154	SERPINA5	SERPINA5	4.87471	CM	40
CV42_41	CV42	P05154	SERPINA5	SERPINA5	5.78078	CM	41
CV19_42	CV19	P05154	SERPINA5	SERPINA5	6.877	CM	42
CV70_43	CV70	P05154	SERPINA5	SERPINA5	5.9397	CM	43
C78_44	C78	P05154	SERPINA5	SERPINA5	5.62369	CM	44
CV10_45	CV10	P05154	SERPINA5	SERPINA5	6.78432	CM	45
CV8_46	CV8	P05154	SERPINA5	SERPINA5	5.39127	CM	46
CV60_47	CV60	P05154	SERPINA5	SERPINA5	6.22762	CM	47
CV35_48	CV35	P05154	SERPINA5	SERPINA5	7.29491	CM	48
CV48_49	CV48	P05154	SERPINA5	SERPINA5	5.61997	CM	49
CV76_50	CV76	P05154	SERPINA5	SERPINA5	6.81203	CM	50
CV12_51	CV12	P05154	SERPINA5	SERPINA5	5.65843	CM	51
C58_52	C58	P05154	SERPINA5	SERPINA5	7.88299	CM	52
CV53_53	CV53	P05154	SERPINA5	SERPINA5	5.92993	CM	53
CV50_54	CV50	P05154	SERPINA5	SERPINA5	6.20965	CM	54
CV32_56	CV32	P05154	SERPINA5	SERPINA5	6.11242	CM	56
C197_57	C197	P05154	SERPINA5	SERPINA5	7.74126	CM	57
CV18_58	CV18	P05154	SERPINA5	SERPINA5	7.53623	CM	58
CV29_59	CV29	P05154	SERPINA5	SERPINA5	7.22346	CM	59
CV34_60	CV34	P05154	SERPINA5	SERPINA5	7.66792	CM	60
CV41_61	CV41	P05154	SERPINA5	SERPINA5	6.13727	CM	61
CV9_62	CV9	P05154	SERPINA5	SERPINA5	7.67688	CM	62
CV74_63	CV74	P05154	SERPINA5	SERPINA5	6.79427	CM	63
CV16_64	CV16	P05154	SERPINA5	SERPINA5	5.9768	CM	64
CV21_1	CV21	O75015	FCGR3B	FCGR3B	4.87981	CM	1
C161_2	C161	O75015	FCGR3B	FCGR3B	2.25763	CM	2
C173_3	C173	O75015	FCGR3B	FCGR3B	4.10194	CM	3
CV11_4	CV11	O75015	FCGR3B	FCGR3B	4.11408	CM	4
CV59_5	CV59	O75015	FCGR3B	FCGR3B	4.70909	CM	5
C193_6	C193	O75015	FCGR3B	FCGR3B	3.03261	CM	6
C33_7	C33	O75015	FCGR3B	FCGR3B	3.52594	CM	7
CV39_8	CV39	O75015	FCGR3B	FCGR3B	4.17624	CM	8
CV6_9	CV6	O75015	FCGR3B	FCGR3B	4.02994	CM	9
CV38_10	CV38	O75015	FCGR3B	FCGR3B	4.15047	CM	10
CV4_11	CV4	O75015	FCGR3B	FCGR3B	3.87232	CM	11
C195_12	C195	O75015	FCGR3B	FCGR3B	3.31128	CM	12
CV1_13	CV1	O75015	FCGR3B	FCGR3B	3.21867	CM	13
C237_14	C237	O75015	FCGR3B	FCGR3B	3.19878	CM	14
CV2_15	CV2	O75015	FCGR3B	FCGR3B	3.0872	CM	15
C189_16	C189	O75015	FCGR3B	FCGR3B	4.66138	CM	16
CV42_17	CV42	O75015	FCGR3B	FCGR3B	5.16461	CM	17
CV79_18	CV79	O75015	FCGR3B	FCGR3B	4.0409	CM	18
CV3_19	CV3	O75015	FCGR3B	FCGR3B	4.76143	CM	19
CV36_20	CV36	O75015	FCGR3B	FCGR3B	4.50856	CM	20
CV55_21	CV55	O75015	FCGR3B	FCGR3B	3.96691	CM	21
C246_22	C246	O75015	FCGR3B	FCGR3B	3.45504	CM	22
CV30_23	CV30	O75015	FCGR3B	FCGR3B	3.95426	CM	23
CV19_24	CV19	O75015	FCGR3B	FCGR3B	3.06419	CM	24
CV13_25	CV13	O75015	FCGR3B	FCGR3B	4.00469	CM	25
C137_26	C137	O75015	FCGR3B	FCGR3B	3.75593	CM	26
CV47_27	CV47	O75015	FCGR3B	FCGR3B	3.91076	CM	27
CV29_28	CV29	O75015	FCGR3B	FCGR3B	3.74575	CM	28
CV14_29	CV14	O75015	FCGR3B	FCGR3B	3.57156	CM	29
CV56_30	CV56	O75015	FCGR3B	FCGR3B	4.27335	CM	30
CV82_31	CV82	O75015	FCGR3B	FCGR3B	4.59532	CM	31
CV23_32	CV23	O75015	FCGR3B	FCGR3B	4.38267	CM	32
CV37_33	CV37	O75015	FCGR3B	FCGR3B	4.83426	CM	33
CV34_34	CV34	O75015	FCGR3B	FCGR3B	3.85703	CM	34
CV58_35	CV58	O75015	FCGR3B	FCGR3B	4.16425	CM	35
CV22_36	CV22	O75015	FCGR3B	FCGR3B	4.57663	CM	36
CV65_37	CV65	O75015	FCGR3B	FCGR3B	3.92918	CM	37
CV79_38	CV79	O75015	FCGR3B	FCGR3B	3.80409	CM	38
CV1_39	CV1	O75015	FCGR3B	FCGR3B	4.03903	CM	39
CV51_40	CV51	O75015	FCGR3B	FCGR3B	3.54031	CM	40
CV42_41	CV42	O75015	FCGR3B	FCGR3B	4.66067	CM	41
CV19_42	CV19	O75015	FCGR3B	FCGR3B	3.67104	CM	42
CV70_43	CV70	O75015	FCGR3B	FCGR3B	4.24258	CM	43
C78_44	C78	O75015	FCGR3B	FCGR3B	4.32404	CM	44
CV10_45	CV10	O75015	FCGR3B	FCGR3B	3.73118	CM	45
CV8_46	CV8	O75015	FCGR3B	FCGR3B	3.32223	CM	46
CV60_47	CV60	O75015	FCGR3B	FCGR3B	4.22345	CM	47
CV35_48	CV35	O75015	FCGR3B	FCGR3B	4.5752	CM	48
CV48_49	CV48	O75015	FCGR3B	FCGR3B	4.752	CM	49
CV76_50	CV76	O75015	FCGR3B	FCGR3B	4.33473	CM	50
CV12_51	CV12	O75015	FCGR3B	FCGR3B	4.34888	CM	51
C58_52	C58	O75015	FCGR3B	FCGR3B	4.0849	CM	52
CV53_53	CV53	O75015	FCGR3B	FCGR3B	4.50711	CM	53
CV50_54	CV50	O75015	FCGR3B	FCGR3B	3.30874	CM	54
CV32_56	CV32	O75015	FCGR3B	FCGR3B	3.14361	CM	56
C197_57	C197	O75015	FCGR3B	FCGR3B	4.4935	CM	57
CV18_58	CV18	O75015	FCGR3B	FCGR3B	5.34371	CM	58
CV29_59	CV29	O75015	FCGR3B	FCGR3B	3.61271	CM	59
CV34_60	CV34	O75015	FCGR3B	FCGR3B	3.71188	CM	60
CV41_61	CV41	O75015	FCGR3B	FCGR3B	4.28509	CM	61
CV9_62	CV9	O75015	FCGR3B	FCGR3B	4.25654	CM	62
CV74_63	CV74	O75015	FCGR3B	FCGR3B	3.30654	CM	63
CV16_64	CV16	O75015	FCGR3B	FCGR3B	3.81497	CM	64
CV21_1	CV21	P24592	IGFBP6	IGFBP6	8.84414	CM	1
C161_2	C161	P24592	IGFBP6	IGFBP6	9.24003	CM	2
C173_3	C173	P24592	IGFBP6	IGFBP6	9.15199	CM	3
CV11_4	CV11	P24592	IGFBP6	IGFBP6	8.56879	CM	4
CV59_5	CV59	P24592	IGFBP6	IGFBP6	8.64281	CM	5
C193_6	C193	P24592	IGFBP6	IGFBP6	8.83132	CM	6
C33_7	C33	P24592	IGFBP6	IGFBP6	8.36639	CM	7
CV39_8	CV39	P24592	IGFBP6	IGFBP6	8.24229	CM	8
CV6_9	CV6	P24592	IGFBP6	IGFBP6	9.41483	CM	9
CV38_10	CV38	P24592	IGFBP6	IGFBP6	9.74343	CM	10
CV4_11	CV4	P24592	IGFBP6	IGFBP6	8.47019	CM	11
C195_12	C195	P24592	IGFBP6	IGFBP6	8.51212	CM	12
CV1_13	CV1	P24592	IGFBP6	IGFBP6	8.37774	CM	13
C237_14	C237	P24592	IGFBP6	IGFBP6	8.98119	CM	14
CV2_15	CV2	P24592	IGFBP6	IGFBP6	8.38956	CM	15
C189_16	C189	P24592	IGFBP6	IGFBP6	8.87337	CM	16
CV42_17	CV42	P24592	IGFBP6	IGFBP6	9.6353	CM	17
CV79_18	CV79	P24592	IGFBP6	IGFBP6	9.07898	CM	18
CV3_19	CV3	P24592	IGFBP6	IGFBP6	7.33958	CM	19
CV36_20	CV36	P24592	IGFBP6	IGFBP6	8.84788	CM	20
CV55_21	CV55	P24592	IGFBP6	IGFBP6	9.65849	CM	21
C246_22	C246	P24592	IGFBP6	IGFBP6	9.1689	CM	22
CV30_23	CV30	P24592	IGFBP6	IGFBP6	8.34546	CM	23
CV19_24	CV19	P24592	IGFBP6	IGFBP6	9.03788	CM	24
CV13_25	CV13	P24592	IGFBP6	IGFBP6	9.1241	CM	25
C137_26	C137	P24592	IGFBP6	IGFBP6	8.95027	CM	26
CV47_27	CV47	P24592	IGFBP6	IGFBP6	9.02562	CM	27
CV29_28	CV29	P24592	IGFBP6	IGFBP6	9.0015	CM	28
CV14_29	CV14	P24592	IGFBP6	IGFBP6	8.66638	CM	29
CV56_30	CV56	P24592	IGFBP6	IGFBP6	9.52325	CM	30
CV82_31	CV82	P24592	IGFBP6	IGFBP6	9.1035	CM	31
CV23_32	CV23	P24592	IGFBP6	IGFBP6	8.91162	CM	32
CV37_33	CV37	P24592	IGFBP6	IGFBP6	9.69162	CM	33
CV34_34	CV34	P24592	IGFBP6	IGFBP6	9.40818	CM	34
CV58_35	CV58	P24592	IGFBP6	IGFBP6	8.91338	CM	35
CV22_36	CV22	P24592	IGFBP6	IGFBP6	8.78359	CM	36
CV65_37	CV65	P24592	IGFBP6	IGFBP6	8.05515	CM	37
CV79_38	CV79	P24592	IGFBP6	IGFBP6	8.5544	CM	38
CV1_39	CV1	P24592	IGFBP6	IGFBP6	7.74756	CM	39
CV51_40	CV51	P24592	IGFBP6	IGFBP6	8.79461	CM	40
CV42_41	CV42	P24592	IGFBP6	IGFBP6	9.57069	CM	41
CV19_42	CV19	P24592	IGFBP6	IGFBP6	9.52647	CM	42
CV70_43	CV70	P24592	IGFBP6	IGFBP6	9.9824	CM	43
C78_44	C78	P24592	IGFBP6	IGFBP6	9.48707	CM	44
CV10_45	CV10	P24592	IGFBP6	IGFBP6	8.52272	CM	45
CV8_46	CV8	P24592	IGFBP6	IGFBP6	7.39021	CM	46
CV60_47	CV60	P24592	IGFBP6	IGFBP6	9.50842	CM	47
CV35_48	CV35	P24592	IGFBP6	IGFBP6	9.16181	CM	48
CV48_49	CV48	P24592	IGFBP6	IGFBP6	9.33964	CM	49
CV76_50	CV76	P24592	IGFBP6	IGFBP6	8.8286	CM	50
CV12_51	CV12	P24592	IGFBP6	IGFBP6	9.27356	CM	51
C58_52	C58	P24592	IGFBP6	IGFBP6	8.48964	CM	52
CV53_53	CV53	P24592	IGFBP6	IGFBP6	9.38072	CM	53
CV50_54	CV50	P24592	IGFBP6	IGFBP6	8.11462	CM	54
CV32_56	CV32	P24592	IGFBP6	IGFBP6	8.07665	CM	56
C197_57	C197	P24592	IGFBP6	IGFBP6	8.82732	CM	57
CV18_58	CV18	P24592	IGFBP6	IGFBP6	8.2742	CM	58
CV29_59	CV29	P24592	IGFBP6	IGFBP6	9.81104	CM	59
CV34_60	CV34	P24592	IGFBP6	IGFBP6	9.41154	CM	60
CV41_61	CV41	P24592	IGFBP6	IGFBP6	8.65592	CM	61
CV9_62	CV9	P24592	IGFBP6	IGFBP6	9.28431	CM	62
CV74_63	CV74	P24592	IGFBP6	IGFBP6	8.19769	CM	63
CV16_64	CV16	P24592	IGFBP6	IGFBP6	8.31727	CM	64
CV21_1	CV21	P12830	CDH1	CDH1	5.1346	CM	1
C161_2	C161	P12830	CDH1	CDH1	4.00304	CM	2
C173_3	C173	P12830	CDH1	CDH1	4.93456	CM	3
CV11_4	CV11	P12830	CDH1	CDH1	4.40149	CM	4
CV59_5	CV59	P12830	CDH1	CDH1	3.90677	CM	5
C193_6	C193	P12830	CDH1	CDH1	4.06461	CM	6
C33_7	C33	P12830	CDH1	CDH1	4.60588	CM	7
CV39_8	CV39	P12830	CDH1	CDH1	4.19721	CM	8
CV6_9	CV6	P12830	CDH1	CDH1	4.83622	CM	9
CV38_10	CV38	P12830	CDH1	CDH1	4.81551	CM	10
CV4_11	CV4	P12830	CDH1	CDH1	4.23883	CM	11
C195_12	C195	P12830	CDH1	CDH1	4.09856	CM	12
CV1_13	CV1	P12830	CDH1	CDH1	3.94086	CM	13
C237_14	C237	P12830	CDH1	CDH1	4.23358	CM	14
CV2_15	CV2	P12830	CDH1	CDH1	4.12134	CM	15
C189_16	C189	P12830	CDH1	CDH1	4.72833	CM	16
CV42_17	CV42	P12830	CDH1	CDH1	5.24023	CM	17
CV79_18	CV79	P12830	CDH1	CDH1	4.29441	CM	18
CV3_19	CV3	P12830	CDH1	CDH1	3.86053	CM	19
CV36_20	CV36	P12830	CDH1	CDH1	4.51677	CM	20
CV55_21	CV55	P12830	CDH1	CDH1	4.78579	CM	21
C246_22	C246	P12830	CDH1	CDH1	4.25236	CM	22
CV30_23	CV30	P12830	CDH1	CDH1	4.09238	CM	23
CV19_24	CV19	P12830	CDH1	CDH1	4.55029	CM	24
CV13_25	CV13	P12830	CDH1	CDH1	4.2331	CM	25
C137_26	C137	P12830	CDH1	CDH1	4.55909	CM	26
CV47_27	CV47	P12830	CDH1	CDH1	4.83129	CM	27
CV29_28	CV29	P12830	CDH1	CDH1	4.57142	CM	28
CV14_29	CV14	P12830	CDH1	CDH1	4.37966	CM	29
CV56_30	CV56	P12830	CDH1	CDH1	4.49301	CM	30
CV82_31	CV82	P12830	CDH1	CDH1	4.61115	CM	31
CV23_32	CV23	P12830	CDH1	CDH1	4.48733	CM	32
CV37_33	CV37	P12830	CDH1	CDH1	5.24835	CM	33
CV34_34	CV34	P12830	CDH1	CDH1	5.09025	CM	34
CV58_35	CV58	P12830	CDH1	CDH1	4.87569	CM	35
CV22_36	CV22	P12830	CDH1	CDH1	4.93854	CM	36
CV65_37	CV65	P12830	CDH1	CDH1	4.00315	CM	37
CV79_38	CV79	P12830	CDH1	CDH1	3.94307	CM	38
CV1_39	CV1	P12830	CDH1	CDH1	3.71289	CM	39
CV51_40	CV51	P12830	CDH1	CDH1	4.68329	CM	40
CV42_41	CV42	P12830	CDH1	CDH1	5.6842	CM	41
CV19_42	CV19	P12830	CDH1	CDH1	5.13599	CM	42
CV70_43	CV70	P12830	CDH1	CDH1	4.57156	CM	43
C78_44	C78	P12830	CDH1	CDH1	5.35595	CM	44
CV10_45	CV10	P12830	CDH1	CDH1	4.39944	CM	45
CV8_46	CV8	P12830	CDH1	CDH1	3.90507	CM	46
CV60_47	CV60	P12830	CDH1	CDH1	4.66414	CM	47
CV35_48	CV35	P12830	CDH1	CDH1	5.13411	CM	48
CV48_49	CV48	P12830	CDH1	CDH1	4.39815	CM	49
CV76_50	CV76	P12830	CDH1	CDH1	4.37594	CM	50
CV12_51	CV12	P12830	CDH1	CDH1	4.38358	CM	51
C58_52	C58	P12830	CDH1	CDH1	4.11347	CM	52
CV53_53	CV53	P12830	CDH1	CDH1	5.2989	CM	53
CV50_54	CV50	P12830	CDH1	CDH1	4.35731	CM	54
CV32_56	CV32	P12830	CDH1	CDH1	4.08439	CM	56
C197_57	C197	P12830	CDH1	CDH1	4.70272	CM	57
CV18_58	CV18	P12830	CDH1	CDH1	4.74823	CM	58
CV29_59	CV29	P12830	CDH1	CDH1	5.22141	CM	59
CV34_60	CV34	P12830	CDH1	CDH1	5.07831	CM	60
CV41_61	CV41	P12830	CDH1	CDH1	4.13333	CM	61
CV9_62	CV9	P12830	CDH1	CDH1	4.56667	CM	62
CV74_63	CV74	P12830	CDH1	CDH1	4.04772	CM	63
CV16_64	CV16	P12830	CDH1	CDH1	4.40786	CM	64
CV21_1	CV21	P13501	CCL5	CCL5	4.7964	CM	1
C161_2	C161	P13501	CCL5	CCL5	5.11902	CM	2
C173_3	C173	P13501	CCL5	CCL5	3.64247	CM	3
CV11_4	CV11	P13501	CCL5	CCL5	6.11555	CM	4
CV59_5	CV59	P13501	CCL5	CCL5	5.69335	CM	5
C193_6	C193	P13501	CCL5	CCL5	4.01725	CM	6
C33_7	C33	P13501	CCL5	CCL5	4.29674	CM	7
CV39_8	CV39	P13501	CCL5	CCL5	6.78888	CM	8
CV6_9	CV6	P13501	CCL5	CCL5	5.42038	CM	9
CV38_10	CV38	P13501	CCL5	CCL5	6.27124	CM	10
CV4_11	CV4	P13501	CCL5	CCL5	5.97212	CM	11
C195_12	C195	P13501	CCL5	CCL5	4.49029	CM	12
CV1_13	CV1	P13501	CCL5	CCL5	3.60867	CM	13
C237_14	C237	P13501	CCL5	CCL5	5.41935	CM	14
CV2_15	CV2	P13501	CCL5	CCL5	4.4818	CM	15
C189_16	C189	P13501	CCL5	CCL5	3.75382	CM	16
CV42_17	CV42	P13501	CCL5	CCL5	7.20818	CM	17
CV79_18	CV79	P13501	CCL5	CCL5	5.73094	CM	18
CV3_19	CV3	P13501	CCL5	CCL5	5.8688	CM	19
CV36_20	CV36	P13501	CCL5	CCL5	5.41084	CM	20
CV55_21	CV55	P13501	CCL5	CCL5	6.08187	CM	21
C246_22	C246	P13501	CCL5	CCL5	5.39843	CM	22
CV30_23	CV30	P13501	CCL5	CCL5	6.489	CM	23
CV19_24	CV19	P13501	CCL5	CCL5	5.27543	CM	24
CV13_25	CV13	P13501	CCL5	CCL5	6.82388	CM	25
C137_26	C137	P13501	CCL5	CCL5	4.40583	CM	26
CV47_27	CV47	P13501	CCL5	CCL5	6.52504	CM	27
CV29_28	CV29	P13501	CCL5	CCL5	5.60488	CM	28
CV14_29	CV14	P13501	CCL5	CCL5	3.62771	CM	29
CV56_30	CV56	P13501	CCL5	CCL5	6.49584	CM	30
CV82_31	CV82	P13501	CCL5	CCL5	7.18528	CM	31
CV23_32	CV23	P13501	CCL5	CCL5	5.89734	CM	32
CV37_33	CV37	P13501	CCL5	CCL5	6.31105	CM	33
CV34_34	CV34	P13501	CCL5	CCL5	4.60514	CM	34
CV58_35	CV58	P13501	CCL5	CCL5	6.16997	CM	35
CV22_36	CV22	P13501	CCL5	CCL5	4.88386	CM	36
CV65_37	CV65	P13501	CCL5	CCL5	2.52233	CM	37
CV79_38	CV79	P13501	CCL5	CCL5	5.28665	CM	38
CV1_39	CV1	P13501	CCL5	CCL5	6.64315	CM	39
CV51_40	CV51	P13501	CCL5	CCL5	4.0993	CM	40
CV42_41	CV42	P13501	CCL5	CCL5	6.84726	CM	41
CV19_42	CV19	P13501	CCL5	CCL5	6.10575	CM	42
CV70_43	CV70	P13501	CCL5	CCL5	6.75027	CM	43
C78_44	C78	P13501	CCL5	CCL5	6.7265	CM	44
CV10_45	CV10	P13501	CCL5	CCL5	4.12482	CM	45
CV8_46	CV8	P13501	CCL5	CCL5	5.10945	CM	46
CV60_47	CV60	P13501	CCL5	CCL5	5.74432	CM	47
CV35_48	CV35	P13501	CCL5	CCL5	5.55851	CM	48
CV48_49	CV48	P13501	CCL5	CCL5	5.28698	CM	49
CV76_50	CV76	P13501	CCL5	CCL5	5.09216	CM	50
CV12_51	CV12	P13501	CCL5	CCL5	5.69315	CM	51
C58_52	C58	P13501	CCL5	CCL5	4.94323	CM	52
CV53_53	CV53	P13501	CCL5	CCL5	5.47178	CM	53
CV50_54	CV50	P13501	CCL5	CCL5	4.52631	CM	54
CV32_56	CV32	P13501	CCL5	CCL5	4.30423	CM	56
C197_57	C197	P13501	CCL5	CCL5	5.98727	CM	57
CV18_58	CV18	P13501	CCL5	CCL5	5.14391	CM	58
CV29_59	CV29	P13501	CCL5	CCL5	5.93887	CM	59
CV34_60	CV34	P13501	CCL5	CCL5	4.45569	CM	60
CV41_61	CV41	P13501	CCL5	CCL5	3.37848	CM	61
CV9_62	CV9	P13501	CCL5	CCL5	5.53458	CM	62
CV74_63	CV74	P13501	CCL5	CCL5	4.13123	CM	63
CV16_64	CV16	P13501	CCL5	CCL5	5.23923	CM	64
CV21_1	CV21	Q16627	CCL14	CCL14	8.28601	CM	1
C161_2	C161	Q16627	CCL14	CCL14	7.71971	CM	2
C173_3	C173	Q16627	CCL14	CCL14	8.39534	CM	3
CV11_4	CV11	Q16627	CCL14	CCL14	7.88639	CM	4
CV59_5	CV59	Q16627	CCL14	CCL14	8.23792	CM	5
C193_6	C193	Q16627	CCL14	CCL14	7.81186	CM	6
C33_7	C33	Q16627	CCL14	CCL14	7.71075	CM	7
CV39_8	CV39	Q16627	CCL14	CCL14	7.6324	CM	8
CV6_9	CV6	Q16627	CCL14	CCL14	7.11164	CM	9
CV38_10	CV38	Q16627	CCL14	CCL14	8.31617	CM	10
CV4_11	CV4	Q16627	CCL14	CCL14	7.67895	CM	11
C195_12	C195	Q16627	CCL14	CCL14	8.27732	CM	12
CV1_13	CV1	Q16627	CCL14	CCL14	7.5601	CM	13
C237_14	C237	Q16627	CCL14	CCL14	8.44299	CM	14
CV2_15	CV2	Q16627	CCL14	CCL14	7.76269	CM	15
C189_16	C189	Q16627	CCL14	CCL14	8.4338	CM	16
CV42_17	CV42	Q16627	CCL14	CCL14	9.29462	CM	17
CV79_18	CV79	Q16627	CCL14	CCL14	8.79413	CM	18
CV3_19	CV3	Q16627	CCL14	CCL14	8.12801	CM	19
CV36_20	CV36	Q16627	CCL14	CCL14	7.9994	CM	20
CV55_21	CV55	Q16627	CCL14	CCL14	7.13483	CM	21
C246_22	C246	Q16627	CCL14	CCL14	7.96244	CM	22
CV30_23	CV30	Q16627	CCL14	CCL14	7.57213	CM	23
CV19_24	CV19	Q16627	CCL14	CCL14	8.13887	CM	24
CV13_25	CV13	Q16627	CCL14	CCL14	8.25182	CM	25
C137_26	C137	Q16627	CCL14	CCL14	8.27352	CM	26
CV47_27	CV47	Q16627	CCL14	CCL14	8.91665	CM	27
CV29_28	CV29	Q16627	CCL14	CCL14	8.96723	CM	28
CV14_29	CV14	Q16627	CCL14	CCL14	7.67202	CM	29
CV56_30	CV56	Q16627	CCL14	CCL14	9.43062	CM	30
CV82_31	CV82	Q16627	CCL14	CCL14	8.07207	CM	31
CV23_32	CV23	Q16627	CCL14	CCL14	7.9602	CM	32
CV37_33	CV37	Q16627	CCL14	CCL14	8.69671	CM	33
CV34_34	CV34	Q16627	CCL14	CCL14	8.29358	CM	34
CV58_35	CV58	Q16627	CCL14	CCL14	8.59152	CM	35
CV22_36	CV22	Q16627	CCL14	CCL14	7.5799	CM	36
CV65_37	CV65	Q16627	CCL14	CCL14	8.38297	CM	37
CV79_38	CV79	Q16627	CCL14	CCL14	8.22649	CM	38
CV1_39	CV1	Q16627	CCL14	CCL14	6.87949	CM	39
CV51_40	CV51	Q16627	CCL14	CCL14	7.31953	CM	40
CV42_41	CV42	Q16627	CCL14	CCL14	9.14028	CM	41
CV19_42	CV19	Q16627	CCL14	CCL14	8.57311	CM	42
CV70_43	CV70	Q16627	CCL14	CCL14	8.23541	CM	43
C78_44	C78	Q16627	CCL14	CCL14	7.97589	CM	44
CV10_45	CV10	Q16627	CCL14	CCL14	7.89225	CM	45
CV8_46	CV8	Q16627	CCL14	CCL14	7.58097	CM	46
CV60_47	CV60	Q16627	CCL14	CCL14	8.55298	CM	47
CV35_48	CV35	Q16627	CCL14	CCL14	8.25539	CM	48
CV48_49	CV48	Q16627	CCL14	CCL14	8.56409	CM	49
CV76_50	CV76	Q16627	CCL14	CCL14	9.34799	CM	50
CV12_51	CV12	Q16627	CCL14	CCL14	8.03315	CM	51
C58_52	C58	Q16627	CCL14	CCL14	8.1118	CM	52
CV53_53	CV53	Q16627	CCL14	CCL14	8.78332	CM	53
CV50_54	CV50	Q16627	CCL14	CCL14	8.64903	CM	54
CV32_56	CV32	Q16627	CCL14	CCL14	7.56822	CM	56
C197_57	C197	Q16627	CCL14	CCL14	8.13594	CM	57
CV18_58	CV18	Q16627	CCL14	CCL14	8.20909	CM	58
CV29_59	CV29	Q16627	CCL14	CCL14	9.0196	CM	59
CV34_60	CV34	Q16627	CCL14	CCL14	8.37555	CM	60
CV41_61	CV41	Q16627	CCL14	CCL14	7.82025	CM	61
CV9_62	CV9	Q16627	CCL14	CCL14	8.04401	CM	62
CV74_63	CV74	Q16627	CCL14	CCL14	7.68463	CM	63
CV16_64	CV16	Q16627	CCL14	CCL14	6.92132	CM	64
CV21_1	CV21	P22749	GNLY	GNLY	1.07562	CM	1
C161_2	C161	P22749	GNLY	GNLY	-0.02147	CM	2
C173_3	C173	P22749	GNLY	GNLY	0.60374	CM	3
CV11_4	CV11	P22749	GNLY	GNLY	1.86682	CM	4
CV59_5	CV59	P22749	GNLY	GNLY	1.00419	CM	5
C193_6	C193	P22749	GNLY	GNLY	-0.28243	CM	6
C33_7	C33	P22749	GNLY	GNLY	0.50414	CM	7
CV39_8	CV39	P22749	GNLY	GNLY	1.83814	CM	8
CV6_9	CV6	P22749	GNLY	GNLY	0.73868	CM	9
CV38_10	CV38	P22749	GNLY	GNLY	1.93094	CM	10
CV4_11	CV4	P22749	GNLY	GNLY	1.53642	CM	11
C195_12	C195	P22749	GNLY	GNLY	1.49786	CM	12
CV1_13	CV1	P22749	GNLY	GNLY	0.79373	CM	13
C237_14	C237	P22749	GNLY	GNLY	1.14839	CM	14
CV2_15	CV2	P22749	GNLY	GNLY	0.77558	CM	15
C189_16	C189	P22749	GNLY	GNLY	1.27066	CM	16
CV42_17	CV42	P22749	GNLY	GNLY	2.02084	CM	17
CV79_18	CV79	P22749	GNLY	GNLY	0.51483	CM	18
CV3_19	CV3	P22749	GNLY	GNLY	0.93901	CM	19
CV36_20	CV36	P22749	GNLY	GNLY	1.96273	CM	20
CV55_21	CV55	P22749	GNLY	GNLY	1.62487	CM	21
C246_22	C246	P22749	GNLY	GNLY	0.21534	CM	22
CV30_23	CV30	P22749	GNLY	GNLY	1.49306	CM	23
CV19_24	CV19	P22749	GNLY	GNLY	1.02108	CM	24
CV13_25	CV13	P22749	GNLY	GNLY	1.129	CM	25
C137_26	C137	P22749	GNLY	GNLY	0.59437	CM	26
CV47_27	CV47	P22749	GNLY	GNLY	0.88233	CM	27
CV29_28	CV29	P22749	GNLY	GNLY	0.92385	CM	28
CV14_29	CV14	P22749	GNLY	GNLY	0.8791	CM	29
CV56_30	CV56	P22749	GNLY	GNLY	1.3967	CM	30
CV82_31	CV82	P22749	GNLY	GNLY	1.93609	CM	31
CV23_32	CV23	P22749	GNLY	GNLY	0.90932	CM	32
CV37_33	CV37	P22749	GNLY	GNLY	1.96641	CM	33
CV34_34	CV34	P22749	GNLY	GNLY	1.35211	CM	34
CV58_35	CV58	P22749	GNLY	GNLY	1.05917	CM	35
CV22_36	CV22	P22749	GNLY	GNLY	0.55501	CM	36
CV65_37	CV65	P22749	GNLY	GNLY	0.18772	CM	37
CV79_38	CV79	P22749	GNLY	GNLY	0.27595	CM	38
CV1_39	CV1	P22749	GNLY	GNLY	1.43815	CM	39
CV51_40	CV51	P22749	GNLY	GNLY	0.53488	CM	40
CV42_41	CV42	P22749	GNLY	GNLY	1.88239	CM	41
CV19_42	CV19	P22749	GNLY	GNLY	1.28945	CM	42
CV70_43	CV70	P22749	GNLY	GNLY	1.29695	CM	43
C78_44	C78	P22749	GNLY	GNLY	1.16278	CM	44
CV10_45	CV10	P22749	GNLY	GNLY	0.51328	CM	45
CV8_46	CV8	P22749	GNLY	GNLY	0.53004	CM	46
CV60_47	CV60	P22749	GNLY	GNLY	1.22378	CM	47
CV35_48	CV35	P22749	GNLY	GNLY	2.06543	CM	48
CV48_49	CV48	P22749	GNLY	GNLY	0.82749	CM	49
CV76_50	CV76	P22749	GNLY	GNLY	0.833	CM	50
CV12_51	CV12	P22749	GNLY	GNLY	1.62968	CM	51
C58_52	C58	P22749	GNLY	GNLY	1.76771	CM	52
CV53_53	CV53	P22749	GNLY	GNLY	1.63023	CM	53
CV50_54	CV50	P22749	GNLY	GNLY	1.2653	CM	54
CV32_56	CV32	P22749	GNLY	GNLY	0.36807	CM	56
C197_57	C197	P22749	GNLY	GNLY	0.48053	CM	57
CV18_58	CV18	P22749	GNLY	GNLY	1.68027	CM	58
CV29_59	CV29	P22749	GNLY	GNLY	1.74126	CM	59
CV34_60	CV34	P22749	GNLY	GNLY	0.93377	CM	60
CV41_61	CV41	P22749	GNLY	GNLY	0.77102	CM	61
CV9_62	CV9	P22749	GNLY	GNLY	0.35873	CM	62
CV74_63	CV74	P22749	GNLY	GNLY	0.39498	CM	63
CV16_64	CV16	P22749	GNLY	GNLY	1.24368	CM	64
CV21_1	CV21	P46531	NOTCH1	NOTCH1	4.31514	CM	1
C161_2	C161	P46531	NOTCH1	NOTCH1	3.30375	CM	2
C173_3	C173	P46531	NOTCH1	NOTCH1	3.41437	CM	3
CV11_4	CV11	P46531	NOTCH1	NOTCH1	3.45909	CM	4
CV59_5	CV59	P46531	NOTCH1	NOTCH1	3.1247	CM	5
C193_6	C193	P46531	NOTCH1	NOTCH1	2.64472	CM	6
C33_7	C33	P46531	NOTCH1	NOTCH1	2.95475	CM	7
CV39_8	CV39	P46531	NOTCH1	NOTCH1	3.58069	CM	8
CV6_9	CV6	P46531	NOTCH1	NOTCH1	3.50934	CM	9
CV38_10	CV38	P46531	NOTCH1	NOTCH1	4.15842	CM	10
CV4_11	CV4	P46531	NOTCH1	NOTCH1	3.47411	CM	11
C195_12	C195	P46531	NOTCH1	NOTCH1	3.431	CM	12
CV1_13	CV1	P46531	NOTCH1	NOTCH1	3.2731	CM	13
C237_14	C237	P46531	NOTCH1	NOTCH1	3.29527	CM	14
CV2_15	CV2	P46531	NOTCH1	NOTCH1	2.88702	CM	15
C189_16	C189	P46531	NOTCH1	NOTCH1	3.20065	CM	16
CV42_17	CV42	P46531	NOTCH1	NOTCH1	4.02204	CM	17
CV79_18	CV79	P46531	NOTCH1	NOTCH1	3.83878	CM	18
CV3_19	CV3	P46531	NOTCH1	NOTCH1	3.05984	CM	19
CV36_20	CV36	P46531	NOTCH1	NOTCH1	4.16981	CM	20
CV55_21	CV55	P46531	NOTCH1	NOTCH1	3.72464	CM	21
C246_22	C246	P46531	NOTCH1	NOTCH1	3.19244	CM	22
CV30_23	CV30	P46531	NOTCH1	NOTCH1	3.69638	CM	23
CV19_24	CV19	P46531	NOTCH1	NOTCH1	3.33784	CM	24
CV13_25	CV13	P46531	NOTCH1	NOTCH1	3.64516	CM	25
C137_26	C137	P46531	NOTCH1	NOTCH1	3.45483	CM	26
CV47_27	CV47	P46531	NOTCH1	NOTCH1	3.90549	CM	27
CV29_28	CV29	P46531	NOTCH1	NOTCH1	3.49934	CM	28
CV14_29	CV14	P46531	NOTCH1	NOTCH1	2.98325	CM	29
CV56_30	CV56	P46531	NOTCH1	NOTCH1	3.39333	CM	30
CV82_31	CV82	P46531	NOTCH1	NOTCH1	3.8922	CM	31
CV23_32	CV23	P46531	NOTCH1	NOTCH1	3.21951	CM	32
CV37_33	CV37	P46531	NOTCH1	NOTCH1	4.33176	CM	33
CV34_34	CV34	P46531	NOTCH1	NOTCH1	3.80008	CM	34
CV58_35	CV58	P46531	NOTCH1	NOTCH1	3.78549	CM	35
CV22_36	CV22	P46531	NOTCH1	NOTCH1	3.98727	CM	36
CV65_37	CV65	P46531	NOTCH1	NOTCH1	3.24471	CM	37
CV79_38	CV79	P46531	NOTCH1	NOTCH1	3.51141	CM	38
CV1_39	CV1	P46531	NOTCH1	NOTCH1	3.27028	CM	39
CV51_40	CV51	P46531	NOTCH1	NOTCH1	3.57877	CM	40
CV42_41	CV42	P46531	NOTCH1	NOTCH1	4.21211	CM	41
CV19_42	CV19	P46531	NOTCH1	NOTCH1	3.82258	CM	42
CV70_43	CV70	P46531	NOTCH1	NOTCH1	4.12073	CM	43
C78_44	C78	P46531	NOTCH1	NOTCH1	4.22495	CM	44
CV10_45	CV10	P46531	NOTCH1	NOTCH1	3.09305	CM	45
CV8_46	CV8	P46531	NOTCH1	NOTCH1	3.10879	CM	46
CV60_47	CV60	P46531	NOTCH1	NOTCH1	3.87767	CM	47
CV35_48	CV35	P46531	NOTCH1	NOTCH1	3.96968	CM	48
CV48_49	CV48	P46531	NOTCH1	NOTCH1	3.72685	CM	49
CV76_50	CV76	P46531	NOTCH1	NOTCH1	3.51265	CM	50
CV12_51	CV12	P46531	NOTCH1	NOTCH1	3.55864	CM	51
C58_52	C58	P46531	NOTCH1	NOTCH1	3.68646	CM	52
CV53_53	CV53	P46531	NOTCH1	NOTCH1	4.31932	CM	53
CV50_54	CV50	P46531	NOTCH1	NOTCH1	3.46094	CM	54
CV32_56	CV32	P46531	NOTCH1	NOTCH1	3.04519	CM	56
C197_57	C197	P46531	NOTCH1	NOTCH1	3.55456	CM	57
CV18_58	CV18	P46531	NOTCH1	NOTCH1	4.15313	CM	58
CV29_59	CV29	P46531	NOTCH1	NOTCH1	3.84375	CM	59
CV34_60	CV34	P46531	NOTCH1	NOTCH1	3.74234	CM	60
CV41_61	CV41	P46531	NOTCH1	NOTCH1	3.41293	CM	61
CV9_62	CV9	P46531	NOTCH1	NOTCH1	3.80806	CM	62
CV74_63	CV74	P46531	NOTCH1	NOTCH1	3.56559	CM	63
CV16_64	CV16	P46531	NOTCH1	NOTCH1	3.26987	CM	64
CV21_1	CV21	P19021	PAM	PAM	2.75607	CM	1
C161_2	C161	P19021	PAM	PAM	1.95183	CM	2
C173_3	C173	P19021	PAM	PAM	2.09412	CM	3
CV11_4	CV11	P19021	PAM	PAM	1.69058	CM	4
CV59_5	CV59	P19021	PAM	PAM	1.81053	CM	5
C193_6	C193	P19021	PAM	PAM	1.54546	CM	6
C33_7	C33	P19021	PAM	PAM	1.55719	CM	7
CV39_8	CV39	P19021	PAM	PAM	2.24394	CM	8
CV6_9	CV6	P19021	PAM	PAM	2.29139	CM	9
CV38_10	CV38	P19021	PAM	PAM	2.98548	CM	10
CV4_11	CV4	P19021	PAM	PAM	2.55937	CM	11
C195_12	C195	P19021	PAM	PAM	1.94428	CM	12
CV1_13	CV1	P19021	PAM	PAM	1.7543	CM	13
C237_14	C237	P19021	PAM	PAM	1.76694	CM	14
CV2_15	CV2	P19021	PAM	PAM	1.73122	CM	15
C189_16	C189	P19021	PAM	PAM	1.71983	CM	16
CV42_17	CV42	P19021	PAM	PAM	2.74242	CM	17
CV79_18	CV79	P19021	PAM	PAM	2.09696	CM	18
CV3_19	CV3	P19021	PAM	PAM	2.05017	CM	19
CV36_20	CV36	P19021	PAM	PAM	2.79018	CM	20
CV55_21	CV55	P19021	PAM	PAM	2.74498	CM	21
C246_22	C246	P19021	PAM	PAM	1.23688	CM	22
CV30_23	CV30	P19021	PAM	PAM	2.04407	CM	23
CV19_24	CV19	P19021	PAM	PAM	1.95656	CM	24
CV13_25	CV13	P19021	PAM	PAM	2.78712	CM	25
C137_26	C137	P19021	PAM	PAM	1.94336	CM	26
CV47_27	CV47	P19021	PAM	PAM	2.5396	CM	27
CV29_28	CV29	P19021	PAM	PAM	1.99904	CM	28
CV14_29	CV14	P19021	PAM	PAM	2.14951	CM	29
CV56_30	CV56	P19021	PAM	PAM	2.42207	CM	30
CV82_31	CV82	P19021	PAM	PAM	3.20916	CM	31
CV23_32	CV23	P19021	PAM	PAM	2.03088	CM	32
CV37_33	CV37	P19021	PAM	PAM	3.0212	CM	33
CV34_34	CV34	P19021	PAM	PAM	2.39917	CM	34
CV58_35	CV58	P19021	PAM	PAM	2.93577	CM	35
CV22_36	CV22	P19021	PAM	PAM	2.58499	CM	36
CV65_37	CV65	P19021	PAM	PAM	1.74771	CM	37
CV79_38	CV79	P19021	PAM	PAM	1.76819	CM	38
CV1_39	CV1	P19021	PAM	PAM	2.09253	CM	39
CV51_40	CV51	P19021	PAM	PAM	2.29673	CM	40
CV42_41	CV42	P19021	PAM	PAM	3.11924	CM	41
CV19_42	CV19	P19021	PAM	PAM	2.69089	CM	42
CV70_43	CV70	P19021	PAM	PAM	3.15799	CM	43
C78_44	C78	P19021	PAM	PAM	3.0077	CM	44
CV10_45	CV10	P19021	PAM	PAM	1.77963	CM	45
CV8_46	CV8	P19021	PAM	PAM	1.2152	CM	46
CV60_47	CV60	P19021	PAM	PAM	2.30902	CM	47
CV35_48	CV35	P19021	PAM	PAM	2.42343	CM	48
CV48_49	CV48	P19021	PAM	PAM	2.64628	CM	49
CV76_50	CV76	P19021	PAM	PAM	2.37999	CM	50
CV12_51	CV12	P19021	PAM	PAM	3.02935	CM	51
C58_52	C58	P19021	PAM	PAM	2.1316	CM	52
CV53_53	CV53	P19021	PAM	PAM	2.34677	CM	53
CV50_54	CV50	P19021	PAM	PAM	2.21127	CM	54
CV32_56	CV32	P19021	PAM	PAM	1.94441	CM	56
C197_57	C197	P19021	PAM	PAM	2.06213	CM	57
CV18_58	CV18	P19021	PAM	PAM	2.12191	CM	58
CV29_59	CV29	P19021	PAM	PAM	2.53103	CM	59
CV34_60	CV34	P19021	PAM	PAM	2.54401	CM	60
CV41_61	CV41	P19021	PAM	PAM	2.34517	CM	61
CV9_62	CV9	P19021	PAM	PAM	2.26501	CM	62
CV74_63	CV74	P19021	PAM	PAM	2.29918	CM	63
CV16_64	CV16	P19021	PAM	PAM	1.99812	CM	64
CV21_1	CV21	P04070	PROC	PROC	4.09724	CM	1
C161_2	C161	P04070	PROC	PROC	4.48163	CM	2
C173_3	C173	P04070	PROC	PROC	3.27153	CM	3
CV11_4	CV11	P04070	PROC	PROC	3.7652	CM	4
CV59_5	CV59	P04070	PROC	PROC	3.60071	CM	5
C193_6	C193	P04070	PROC	PROC	3.31841	CM	6
C33_7	C33	P04070	PROC	PROC	3.68932	CM	7
CV39_8	CV39	P04070	PROC	PROC	4.1475	CM	8
CV6_9	CV6	P04070	PROC	PROC	4.83806	CM	9
CV38_10	CV38	P04070	PROC	PROC	4.82187	CM	10
CV4_11	CV4	P04070	PROC	PROC	4.18049	CM	11
C195_12	C195	P04070	PROC	PROC	4.60601	CM	12
CV1_13	CV1	P04070	PROC	PROC	2.94609	CM	13
C237_14	C237	P04070	PROC	PROC	4.23887	CM	14
CV2_15	CV2	P04070	PROC	PROC	2.90613	CM	15
C189_16	C189	P04070	PROC	PROC	3.72365	CM	16
CV42_17	CV42	P04070	PROC	PROC	3.53456	CM	17
CV79_18	CV79	P04070	PROC	PROC	3.69807	CM	18
CV3_19	CV3	P04070	PROC	PROC	3.24066	CM	19
CV36_20	CV36	P04070	PROC	PROC	2.72945	CM	20
CV55_21	CV55	P04070	PROC	PROC	4.03805	CM	21
C246_22	C246	P04070	PROC	PROC	3.36451	CM	22
CV30_23	CV30	P04070	PROC	PROC	3.97695	CM	23
CV19_24	CV19	P04070	PROC	PROC	3.77706	CM	24
CV13_25	CV13	P04070	PROC	PROC	3.25796	CM	25
C137_26	C137	P04070	PROC	PROC	3.965	CM	26
CV47_27	CV47	P04070	PROC	PROC	3.21622	CM	27
CV29_28	CV29	P04070	PROC	PROC	3.98654	CM	28
CV14_29	CV14	P04070	PROC	PROC	2.42963	CM	29
CV56_30	CV56	P04070	PROC	PROC	4.59158	CM	30
CV82_31	CV82	P04070	PROC	PROC	4.47525	CM	31
CV23_32	CV23	P04070	PROC	PROC	3.80831	CM	32
CV37_33	CV37	P04070	PROC	PROC	4.55169	CM	33
CV34_34	CV34	P04070	PROC	PROC	4.18218	CM	34
CV58_35	CV58	P04070	PROC	PROC	5.27443	CM	35
CV22_36	CV22	P04070	PROC	PROC	4.12445	CM	36
CV65_37	CV65	P04070	PROC	PROC	4.47126	CM	37
CV79_38	CV79	P04070	PROC	PROC	3.20796	CM	38
CV1_39	CV1	P04070	PROC	PROC	4.16886	CM	39
CV51_40	CV51	P04070	PROC	PROC	4.41252	CM	40
CV42_41	CV42	P04070	PROC	PROC	3.58875	CM	41
CV19_42	CV19	P04070	PROC	PROC	4.32997	CM	42
CV70_43	CV70	P04070	PROC	PROC	3.956	CM	43
C78_44	C78	P04070	PROC	PROC	4.59752	CM	44
CV10_45	CV10	P04070	PROC	PROC	3.88737	CM	45
CV8_46	CV8	P04070	PROC	PROC	3.10712	CM	46
CV60_47	CV60	P04070	PROC	PROC	3.27403	CM	47
CV35_48	CV35	P04070	PROC	PROC	4.0725	CM	48
CV48_49	CV48	P04070	PROC	PROC	3.56432	CM	49
CV76_50	CV76	P04070	PROC	PROC	3.85835	CM	50
CV12_51	CV12	P04070	PROC	PROC	3.47353	CM	51
C58_52	C58	P04070	PROC	PROC	4.07998	CM	52
CV53_53	CV53	P04070	PROC	PROC	4.05544	CM	53
CV50_54	CV50	P04070	PROC	PROC	4.27987	CM	54
CV32_56	CV32	P04070	PROC	PROC	3.63164	CM	56
C197_57	C197	P04070	PROC	PROC	3.57723	CM	57
CV18_58	CV18	P04070	PROC	PROC	4.84472	CM	58
CV29_59	CV29	P04070	PROC	PROC	4.43917	CM	59
CV34_60	CV34	P04070	PROC	PROC	3.89717	CM	60
CV41_61	CV41	P04070	PROC	PROC	3.43467	CM	61
CV9_62	CV9	P04070	PROC	PROC	3.80305	CM	62
CV74_63	CV74	P04070	PROC	PROC	3.15371	CM	63
CV16_64	CV16	P04070	PROC	PROC	3.90406	CM	64
CV21_1	CV21	P01034	CST3	CST3	10.2539	CM	1
C161_2	C161	P01034	CST3	CST3	9.69836	CM	2
C173_3	C173	P01034	CST3	CST3	9.5153	CM	3
CV11_4	CV11	P01034	CST3	CST3	9.30695	CM	4
CV59_5	CV59	P01034	CST3	CST3	9.69217	CM	5
C193_6	C193	P01034	CST3	CST3	9.2406	CM	6
C33_7	C33	P01034	CST3	CST3	8.74088	CM	7
CV39_8	CV39	P01034	CST3	CST3	9.34832	CM	8
CV6_9	CV6	P01034	CST3	CST3	9.37495	CM	9
CV38_10	CV38	P01034	CST3	CST3	10.09942	CM	10
CV4_11	CV4	P01034	CST3	CST3	9.91517	CM	11
C195_12	C195	P01034	CST3	CST3	9.32052	CM	12
CV1_13	CV1	P01034	CST3	CST3	9.35964	CM	13
C237_14	C237	P01034	CST3	CST3	9.90639	CM	14
CV2_15	CV2	P01034	CST3	CST3	9.70775	CM	15
C189_16	C189	P01034	CST3	CST3	9.55024	CM	16
CV42_17	CV42	P01034	CST3	CST3	9.98789	CM	17
CV79_18	CV79	P01034	CST3	CST3	10.23286	CM	18
CV3_19	CV3	P01034	CST3	CST3	8.80633	CM	19
CV36_20	CV36	P01034	CST3	CST3	10.32854	CM	20
CV55_21	CV55	P01034	CST3	CST3	10.37192	CM	21
C246_22	C246	P01034	CST3	CST3	9.51961	CM	22
CV30_23	CV30	P01034	CST3	CST3	9.62104	CM	23
CV19_24	CV19	P01034	CST3	CST3	10.1077	CM	24
CV13_25	CV13	P01034	CST3	CST3	9.85967	CM	25
C137_26	C137	P01034	CST3	CST3	9.63335	CM	26
CV47_27	CV47	P01034	CST3	CST3	10.3895	CM	27
CV29_28	CV29	P01034	CST3	CST3	10.17349	CM	28
CV14_29	CV14	P01034	CST3	CST3	9.53725	CM	29
CV56_30	CV56	P01034	CST3	CST3	10.1735	CM	30
CV82_31	CV82	P01034	CST3	CST3	10.42879	CM	31
CV23_32	CV23	P01034	CST3	CST3	9.3514	CM	32
CV37_33	CV37	P01034	CST3	CST3	10.14097	CM	33
CV34_34	CV34	P01034	CST3	CST3	10.11384	CM	34
CV58_35	CV58	P01034	CST3	CST3	9.90067	CM	35
CV22_36	CV22	P01034	CST3	CST3	9.98417	CM	36
CV65_37	CV65	P01034	CST3	CST3	10.05507	CM	37
CV79_38	CV79	P01034	CST3	CST3	9.80223	CM	38
CV1_39	CV1	P01034	CST3	CST3	9.62939	CM	39
CV51_40	CV51	P01034	CST3	CST3	9.94537	CM	40
CV42_41	CV42	P01034	CST3	CST3	10.32696	CM	41
CV19_42	CV19	P01034	CST3	CST3	10.39025	CM	42
CV70_43	CV70	P01034	CST3	CST3	10.57835	CM	43
C78_44	C78	P01034	CST3	CST3	10.6303	CM	44
CV10_45	CV10	P01034	CST3	CST3	9.69112	CM	45
CV8_46	CV8	P01034	CST3	CST3	8.66436	CM	46
CV60_47	CV60	P01034	CST3	CST3	10.05362	CM	47
CV35_48	CV35	P01034	CST3	CST3	10.15736	CM	48
CV48_49	CV48	P01034	CST3	CST3	10.08175	CM	49
CV76_50	CV76	P01034	CST3	CST3	9.84247	CM	50
CV12_51	CV12	P01034	CST3	CST3	10.43584	CM	51
C58_52	C58	P01034	CST3	CST3	9.8032	CM	52
CV53_53	CV53	P01034	CST3	CST3	10.31826	CM	53
CV50_54	CV50	P01034	CST3	CST3	9.74927	CM	54
CV32_56	CV32	P01034	CST3	CST3	9.56615	CM	56
C197_57	C197	P01034	CST3	CST3	9.51947	CM	57
CV18_58	CV18	P01034	CST3	CST3	10.09681	CM	58
CV29_59	CV29	P01034	CST3	CST3	10.39205	CM	59
CV34_60	CV34	P01034	CST3	CST3	10.19826	CM	60
CV41_61	CV41	P01034	CST3	CST3	9.48527	CM	61
CV9_62	CV9	P01034	CST3	CST3	10.12742	CM	62
CV74_63	CV74	P01034	CST3	CST3	9.20743	CM	63
CV16_64	CV16	P01034	CST3	CST3	9.00505	CM	64
CV21_1	CV21	P13591	NCAM1	NCAM1	4.31715	CM	1
C161_2	C161	P13591	NCAM1	NCAM1	3.52427	CM	2
C173_3	C173	P13591	NCAM1	NCAM1	4.16439	CM	3
CV11_4	CV11	P13591	NCAM1	NCAM1	3.04748	CM	4
CV59_5	CV59	P13591	NCAM1	NCAM1	3.05944	CM	5
C193_6	C193	P13591	NCAM1	NCAM1	3.28956	CM	6
C33_7	C33	P13591	NCAM1	NCAM1	3.4275	CM	7
CV39_8	CV39	P13591	NCAM1	NCAM1	3.49641	CM	8
CV6_9	CV6	P13591	NCAM1	NCAM1	3.43026	CM	9
CV38_10	CV38	P13591	NCAM1	NCAM1	4.51667	CM	10
CV4_11	CV4	P13591	NCAM1	NCAM1	3.95596	CM	11
C195_12	C195	P13591	NCAM1	NCAM1	3.83952	CM	12
CV1_13	CV1	P13591	NCAM1	NCAM1	3.14174	CM	13
C237_14	C237	P13591	NCAM1	NCAM1	3.27417	CM	14
CV2_15	CV2	P13591	NCAM1	NCAM1	3.41262	CM	15
C189_16	C189	P13591	NCAM1	NCAM1	2.95177	CM	16
CV42_17	CV42	P13591	NCAM1	NCAM1	3.72058	CM	17
CV79_18	CV79	P13591	NCAM1	NCAM1	3.99624	CM	18
CV3_19	CV3	P13591	NCAM1	NCAM1	3.59897	CM	19
CV36_20	CV36	P13591	NCAM1	NCAM1	3.4571	CM	20
CV55_21	CV55	P13591	NCAM1	NCAM1	3.80085	CM	21
C246_22	C246	P13591	NCAM1	NCAM1	3.70021	CM	22
CV30_23	CV30	P13591	NCAM1	NCAM1	3.61512	CM	23
CV19_24	CV19	P13591	NCAM1	NCAM1	3.42257	CM	24
CV13_25	CV13	P13591	NCAM1	NCAM1	4.35015	CM	25
C137_26	C137	P13591	NCAM1	NCAM1	3.48645	CM	26
CV47_27	CV47	P13591	NCAM1	NCAM1	4.26445	CM	27
CV29_28	CV29	P13591	NCAM1	NCAM1	4.30946	CM	28
CV14_29	CV14	P13591	NCAM1	NCAM1	3.30868	CM	29
CV56_30	CV56	P13591	NCAM1	NCAM1	3.27083	CM	30
CV82_31	CV82	P13591	NCAM1	NCAM1	3.51723	CM	31
CV23_32	CV23	P13591	NCAM1	NCAM1	3.4743	CM	32
CV37_33	CV37	P13591	NCAM1	NCAM1	4.56183	CM	33
CV34_34	CV34	P13591	NCAM1	NCAM1	4.17112	CM	34
CV58_35	CV58	P13591	NCAM1	NCAM1	4.53382	CM	35
CV22_36	CV22	P13591	NCAM1	NCAM1	4.04122	CM	36
CV65_37	CV65	P13591	NCAM1	NCAM1	3.89361	CM	37
CV79_38	CV79	P13591	NCAM1	NCAM1	3.57977	CM	38
CV1_39	CV1	P13591	NCAM1	NCAM1	3.72096	CM	39
CV51_40	CV51	P13591	NCAM1	NCAM1	2.9958	CM	40
CV42_41	CV42	P13591	NCAM1	NCAM1	4.0291	CM	41
CV19_42	CV19	P13591	NCAM1	NCAM1	3.84313	CM	42
CV70_43	CV70	P13591	NCAM1	NCAM1	4.16615	CM	43
C78_44	C78	P13591	NCAM1	NCAM1	4.28302	CM	44
CV10_45	CV10	P13591	NCAM1	NCAM1	3.24154	CM	45
CV8_46	CV8	P13591	NCAM1	NCAM1	2.53121	CM	46
CV60_47	CV60	P13591	NCAM1	NCAM1	3.41552	CM	47
CV35_48	CV35	P13591	NCAM1	NCAM1	4.12201	CM	48
CV48_49	CV48	P13591	NCAM1	NCAM1	4.12933	CM	49
CV76_50	CV76	P13591	NCAM1	NCAM1	3.68263	CM	50
CV12_51	CV12	P13591	NCAM1	NCAM1	4.1302	CM	51
C58_52	C58	P13591	NCAM1	NCAM1	3.62637	CM	52
CV53_53	CV53	P13591	NCAM1	NCAM1	3.86352	CM	53
CV50_54	CV50	P13591	NCAM1	NCAM1	3.55344	CM	54
CV32_56	CV32	P13591	NCAM1	NCAM1	3.70086	CM	56
C197_57	C197	P13591	NCAM1	NCAM1	3.63979	CM	57
CV18_58	CV18	P13591	NCAM1	NCAM1	3.12863	CM	58
CV29_59	CV29	P13591	NCAM1	NCAM1	3.85552	CM	59
CV34_60	CV34	P13591	NCAM1	NCAM1	4.1235	CM	60
CV41_61	CV41	P13591	NCAM1	NCAM1	3.49393	CM	61
CV9_62	CV9	P13591	NCAM1	NCAM1	3.67043	CM	62
CV74_63	CV74	P13591	NCAM1	NCAM1	3.63773	CM	63
CV16_64	CV16	P13591	NCAM1	NCAM1	3.26454	CM	64
CV21_1	CV21	Q15113	PCOLCE	PCOLCE	5.99146	CM	1
C161_2	C161	Q15113	PCOLCE	PCOLCE	7.94269	CM	2
C173_3	C173	Q15113	PCOLCE	PCOLCE	7.0635	CM	3
CV11_4	CV11	Q15113	PCOLCE	PCOLCE	5.70874	CM	4
CV59_5	CV59	Q15113	PCOLCE	PCOLCE	5.48679	CM	5
C193_6	C193	Q15113	PCOLCE	PCOLCE	6.67082	CM	6
C33_7	C33	Q15113	PCOLCE	PCOLCE	7.59677	CM	7
CV39_8	CV39	Q15113	PCOLCE	PCOLCE	6.28383	CM	8
CV6_9	CV6	Q15113	PCOLCE	PCOLCE	6.13428	CM	9
CV38_10	CV38	Q15113	PCOLCE	PCOLCE	6.11638	CM	10
CV4_11	CV4	Q15113	PCOLCE	PCOLCE	6.19452	CM	11
C195_12	C195	Q15113	PCOLCE	PCOLCE	5.78084	CM	12
CV1_13	CV1	Q15113	PCOLCE	PCOLCE	5.32789	CM	13
C237_14	C237	Q15113	PCOLCE	PCOLCE	7.10354	CM	14
CV2_15	CV2	Q15113	PCOLCE	PCOLCE	6.13298	CM	15
C189_16	C189	Q15113	PCOLCE	PCOLCE	6.55747	CM	16
CV42_17	CV42	Q15113	PCOLCE	PCOLCE	7.29559	CM	17
CV79_18	CV79	Q15113	PCOLCE	PCOLCE	6.95504	CM	18
CV3_19	CV3	Q15113	PCOLCE	PCOLCE	5.69661	CM	19
CV36_20	CV36	Q15113	PCOLCE	PCOLCE	6.83482	CM	20
CV55_21	CV55	Q15113	PCOLCE	PCOLCE	6.3983	CM	21
C246_22	C246	Q15113	PCOLCE	PCOLCE	7.88011	CM	22
CV30_23	CV30	Q15113	PCOLCE	PCOLCE	6.68597	CM	23
CV19_24	CV19	Q15113	PCOLCE	PCOLCE	6.15683	CM	24
CV13_25	CV13	Q15113	PCOLCE	PCOLCE	6.41741	CM	25
C137_26	C137	Q15113	PCOLCE	PCOLCE	7.42329	CM	26
CV47_27	CV47	Q15113	PCOLCE	PCOLCE	6.79992	CM	27
CV29_28	CV29	Q15113	PCOLCE	PCOLCE	6.55672	CM	28
CV14_29	CV14	Q15113	PCOLCE	PCOLCE	5.85314	CM	29
CV56_30	CV56	Q15113	PCOLCE	PCOLCE	7.58557	CM	30
CV82_31	CV82	Q15113	PCOLCE	PCOLCE	7.56387	CM	31
CV23_32	CV23	Q15113	PCOLCE	PCOLCE	6.79729	CM	32
CV37_33	CV37	Q15113	PCOLCE	PCOLCE	7.00381	CM	33
CV34_34	CV34	Q15113	PCOLCE	PCOLCE	6.58177	CM	34
CV58_35	CV58	Q15113	PCOLCE	PCOLCE	6.95622	CM	35
CV22_36	CV22	Q15113	PCOLCE	PCOLCE	6.63157	CM	36
CV65_37	CV65	Q15113	PCOLCE	PCOLCE	6.11441	CM	37
CV79_38	CV79	Q15113	PCOLCE	PCOLCE	6.43189	CM	38
CV1_39	CV1	Q15113	PCOLCE	PCOLCE	5.30346	CM	39
CV51_40	CV51	Q15113	PCOLCE	PCOLCE	6.18391	CM	40
CV42_41	CV42	Q15113	PCOLCE	PCOLCE	6.51467	CM	41
CV19_42	CV19	Q15113	PCOLCE	PCOLCE	6.56705	CM	42
CV70_43	CV70	Q15113	PCOLCE	PCOLCE	7.11522	CM	43
C78_44	C78	Q15113	PCOLCE	PCOLCE	6.71659	CM	44
CV10_45	CV10	Q15113	PCOLCE	PCOLCE	6.26563	CM	45
CV8_46	CV8	Q15113	PCOLCE	PCOLCE	5.59805	CM	46
CV60_47	CV60	Q15113	PCOLCE	PCOLCE	6.30512	CM	47
CV35_48	CV35	Q15113	PCOLCE	PCOLCE	6.63437	CM	48
CV48_49	CV48	Q15113	PCOLCE	PCOLCE	6.35416	CM	49
CV76_50	CV76	Q15113	PCOLCE	PCOLCE	6.50247	CM	50
CV12_51	CV12	Q15113	PCOLCE	PCOLCE	6.44319	CM	51
C58_52	C58	Q15113	PCOLCE	PCOLCE	6.73456	CM	52
CV53_53	CV53	Q15113	PCOLCE	PCOLCE	6.47023	CM	53
CV50_54	CV50	Q15113	PCOLCE	PCOLCE	6.06876	CM	54
CV32_56	CV32	Q15113	PCOLCE	PCOLCE	5.75039	CM	56
C197_57	C197	Q15113	PCOLCE	PCOLCE	8.38228	CM	57
CV18_58	CV18	Q15113	PCOLCE	PCOLCE	6.51284	CM	58
CV29_59	CV29	Q15113	PCOLCE	PCOLCE	6.99168	CM	59
CV34_60	CV34	Q15113	PCOLCE	PCOLCE	6.49338	CM	60
CV41_61	CV41	Q15113	PCOLCE	PCOLCE	5.81309	CM	61
CV9_62	CV9	Q15113	PCOLCE	PCOLCE	5.45023	CM	62
CV74_63	CV74	Q15113	PCOLCE	PCOLCE	5.73328	CM	63
CV16_64	CV16	Q15113	PCOLCE	PCOLCE	5.2857	CM	64
CV21_1	CV21	Q8NHL6	LILRB1	LILRB1	3.66241	CM	1
C161_2	C161	Q8NHL6	LILRB1	LILRB1	2.94156	CM	2
C173_3	C173	Q8NHL6	LILRB1	LILRB1	2.54366	CM	3
CV11_4	CV11	Q8NHL6	LILRB1	LILRB1	3.39029	CM	4
CV59_5	CV59	Q8NHL6	LILRB1	LILRB1	2.60264	CM	5
C193_6	C193	Q8NHL6	LILRB1	LILRB1	1.86801	CM	6
C33_7	C33	Q8NHL6	LILRB1	LILRB1	1.65806	CM	7
CV39_8	CV39	Q8NHL6	LILRB1	LILRB1	3.13204	CM	8
CV6_9	CV6	Q8NHL6	LILRB1	LILRB1	2.84806	CM	9
CV38_10	CV38	Q8NHL6	LILRB1	LILRB1	3.79527	CM	10
CV4_11	CV4	Q8NHL6	LILRB1	LILRB1	2.81421	CM	11
C195_12	C195	Q8NHL6	LILRB1	LILRB1	2.37627	CM	12
CV1_13	CV1	Q8NHL6	LILRB1	LILRB1	2.40032	CM	13
C237_14	C237	Q8NHL6	LILRB1	LILRB1	2.33957	CM	14
CV2_15	CV2	Q8NHL6	LILRB1	LILRB1	2.89247	CM	15
C189_16	C189	Q8NHL6	LILRB1	LILRB1	2.62537	CM	16
CV42_17	CV42	Q8NHL6	LILRB1	LILRB1	4.24819	CM	17
CV79_18	CV79	Q8NHL6	LILRB1	LILRB1	3.05307	CM	18
CV3_19	CV3	Q8NHL6	LILRB1	LILRB1	2.79507	CM	19
CV36_20	CV36	Q8NHL6	LILRB1	LILRB1	3.88316	CM	20
CV55_21	CV55	Q8NHL6	LILRB1	LILRB1	3.43255	CM	21
C246_22	C246	Q8NHL6	LILRB1	LILRB1	2.22098	CM	22
CV30_23	CV30	Q8NHL6	LILRB1	LILRB1	3.19532	CM	23
CV19_24	CV19	Q8NHL6	LILRB1	LILRB1	2.8621	CM	24
CV13_25	CV13	Q8NHL6	LILRB1	LILRB1	3.37503	CM	25
C137_26	C137	Q8NHL6	LILRB1	LILRB1	2.27668	CM	26
CV47_27	CV47	Q8NHL6	LILRB1	LILRB1	3.61319	CM	27
CV29_28	CV29	Q8NHL6	LILRB1	LILRB1	2.93964	CM	28
CV14_29	CV14	Q8NHL6	LILRB1	LILRB1	2.48073	CM	29
CV56_30	CV56	Q8NHL6	LILRB1	LILRB1	2.78261	CM	30
CV82_31	CV82	Q8NHL6	LILRB1	LILRB1	3.25422	CM	31
CV23_32	CV23	Q8NHL6	LILRB1	LILRB1	2.49283	CM	32
CV37_33	CV37	Q8NHL6	LILRB1	LILRB1	3.4976	CM	33
CV34_34	CV34	Q8NHL6	LILRB1	LILRB1	2.87238	CM	34
CV58_35	CV58	Q8NHL6	LILRB1	LILRB1	4.15675	CM	35
CV22_36	CV22	Q8NHL6	LILRB1	LILRB1	3.7129	CM	36
CV65_37	CV65	Q8NHL6	LILRB1	LILRB1	2.65578	CM	37
CV79_38	CV79	Q8NHL6	LILRB1	LILRB1	2.67784	CM	38
CV1_39	CV1	Q8NHL6	LILRB1	LILRB1	2.58146	CM	39
CV51_40	CV51	Q8NHL6	LILRB1	LILRB1	3.54903	CM	40
CV42_41	CV42	Q8NHL6	LILRB1	LILRB1	4.17976	CM	41
CV19_42	CV19	Q8NHL6	LILRB1	LILRB1	3.52571	CM	42
CV70_43	CV70	Q8NHL6	LILRB1	LILRB1	2.48147	CM	43
C78_44	C78	Q8NHL6	LILRB1	LILRB1	3.75405	CM	44
CV10_45	CV10	Q8NHL6	LILRB1	LILRB1	2.34276	CM	45
CV8_46	CV8	Q8NHL6	LILRB1	LILRB1	2.14588	CM	46
CV60_47	CV60	Q8NHL6	LILRB1	LILRB1	3.70298	CM	47
CV35_48	CV35	Q8NHL6	LILRB1	LILRB1	3.47153	CM	48
CV48_49	CV48	Q8NHL6	LILRB1	LILRB1	3.27338	CM	49
CV76_50	CV76	Q8NHL6	LILRB1	LILRB1	3.61934	CM	50
CV12_51	CV12	Q8NHL6	LILRB1	LILRB1	3.24422	CM	51
C58_52	C58	Q8NHL6	LILRB1	LILRB1	2.56585	CM	52
CV53_53	CV53	Q8NHL6	LILRB1	LILRB1	4.11691	CM	53
CV50_54	CV50	Q8NHL6	LILRB1	LILRB1	3.16595	CM	54
CV32_56	CV32	Q8NHL6	LILRB1	LILRB1	2.01207	CM	56
C197_57	C197	Q8NHL6	LILRB1	LILRB1	2.44538	CM	57
CV18_58	CV18	Q8NHL6	LILRB1	LILRB1	3.67515	CM	58
CV29_59	CV29	Q8NHL6	LILRB1	LILRB1	3.60423	CM	59
CV34_60	CV34	Q8NHL6	LILRB1	LILRB1	2.81199	CM	60
CV41_61	CV41	Q8NHL6	LILRB1	LILRB1	2.62899	CM	61
CV9_62	CV9	Q8NHL6	LILRB1	LILRB1	3.29242	CM	62
CV74_63	CV74	Q8NHL6	LILRB1	LILRB1	3.0385	CM	63
CV16_64	CV16	Q8NHL6	LILRB1	LILRB1	3.01097	CM	64
CV21_1	CV21	P08581	MET	MET	3.08801	CM	1
C161_2	C161	P08581	MET	MET	1.88201	CM	2
C173_3	C173	P08581	MET	MET	1.43221	CM	3
CV11_4	CV11	P08581	MET	MET	1.95509	CM	4
CV59_5	CV59	P08581	MET	MET	2.07403	CM	5
C193_6	C193	P08581	MET	MET	1.532	CM	6
C33_7	C33	P08581	MET	MET	1.36022	CM	7
CV39_8	CV39	P08581	MET	MET	2.37502	CM	8
CV6_9	CV6	P08581	MET	MET	2.10205	CM	9
CV38_10	CV38	P08581	MET	MET	2.98913	CM	10
CV4_11	CV4	P08581	MET	MET	2.83396	CM	11
C195_12	C195	P08581	MET	MET	1.65303	CM	12
CV1_13	CV1	P08581	MET	MET	1.76623	CM	13
C237_14	C237	P08581	MET	MET	1.90589	CM	14
CV2_15	CV2	P08581	MET	MET	1.33564	CM	15
C189_16	C189	P08581	MET	MET	1.63864	CM	16
CV42_17	CV42	P08581	MET	MET	2.32428	CM	17
CV79_18	CV79	P08581	MET	MET	2.23185	CM	18
CV3_19	CV3	P08581	MET	MET	1.92503	CM	19
CV36_20	CV36	P08581	MET	MET	2.10577	CM	20
CV55_21	CV55	P08581	MET	MET	2.278	CM	21
C246_22	C246	P08581	MET	MET	1.73786	CM	22
CV30_23	CV30	P08581	MET	MET	2.52701	CM	23
CV19_24	CV19	P08581	MET	MET	1.88834	CM	24
CV13_25	CV13	P08581	MET	MET	2.10463	CM	25
C137_26	C137	P08581	MET	MET	2.05201	CM	26
CV47_27	CV47	P08581	MET	MET	2.31259	CM	27
CV29_28	CV29	P08581	MET	MET	2.36408	CM	28
CV14_29	CV14	P08581	MET	MET	1.90198	CM	29
CV56_30	CV56	P08581	MET	MET	1.98775	CM	30
CV82_31	CV82	P08581	MET	MET	2.06151	CM	31
CV23_32	CV23	P08581	MET	MET	1.80031	CM	32
CV37_33	CV37	P08581	MET	MET	2.63044	CM	33
CV34_34	CV34	P08581	MET	MET	2.24887	CM	34
CV58_35	CV58	P08581	MET	MET	2.91505	CM	35
CV22_36	CV22	P08581	MET	MET	2.43678	CM	36
CV65_37	CV65	P08581	MET	MET	2.36341	CM	37
CV79_38	CV79	P08581	MET	MET	1.57526	CM	38
CV1_39	CV1	P08581	MET	MET	2.64684	CM	39
CV51_40	CV51	P08581	MET	MET	2.74078	CM	40
CV42_41	CV42	P08581	MET	MET	2.45394	CM	41
CV19_42	CV19	P08581	MET	MET	2.37241	CM	42
CV70_43	CV70	P08581	MET	MET	2.29658	CM	43
C78_44	C78	P08581	MET	MET	3.57777	CM	44
CV10_45	CV10	P08581	MET	MET	2.15951	CM	45
CV8_46	CV8	P08581	MET	MET	1.68008	CM	46
CV60_47	CV60	P08581	MET	MET	2.19608	CM	47
CV35_48	CV35	P08581	MET	MET	2.55973	CM	48
CV48_49	CV48	P08581	MET	MET	2.41852	CM	49
CV76_50	CV76	P08581	MET	MET	2.10961	CM	50
CV12_51	CV12	P08581	MET	MET	2.41499	CM	51
C58_52	C58	P08581	MET	MET	2.19467	CM	52
CV53_53	CV53	P08581	MET	MET	2.34825	CM	53
CV50_54	CV50	P08581	MET	MET	2.5372	CM	54
CV32_56	CV32	P08581	MET	MET	2.46024	CM	56
C197_57	C197	P08581	MET	MET	1.98761	CM	57
CV18_58	CV18	P08581	MET	MET	2.96406	CM	58
CV29_59	CV29	P08581	MET	MET	2.70881	CM	59
CV34_60	CV34	P08581	MET	MET	2.18861	CM	60
CV41_61	CV41	P08581	MET	MET	2.06488	CM	61
CV9_62	CV9	P08581	MET	MET	2.1441	CM	62
CV74_63	CV74	P08581	MET	MET	2.1433	CM	63
CV16_64	CV16	P08581	MET	MET	2.30573	CM	64
CV21_1	CV21	Q14767	LTBP2	LTBP2	3.51495	CM	1
C161_2	C161	Q14767	LTBP2	LTBP2	2.14054	CM	2
C173_3	C173	Q14767	LTBP2	LTBP2	3.17662	CM	3
CV11_4	CV11	Q14767	LTBP2	LTBP2	2.61543	CM	4
CV59_5	CV59	Q14767	LTBP2	LTBP2	1.88538	CM	5
C193_6	C193	Q14767	LTBP2	LTBP2	1.10253	CM	6
C33_7	C33	Q14767	LTBP2	LTBP2	2.06298	CM	7
CV39_8	CV39	Q14767	LTBP2	LTBP2	2.29466	CM	8
CV6_9	CV6	Q14767	LTBP2	LTBP2	2.80739	CM	9
CV38_10	CV38	Q14767	LTBP2	LTBP2	3.42309	CM	10
CV4_11	CV4	Q14767	LTBP2	LTBP2	3.06037	CM	11
C195_12	C195	Q14767	LTBP2	LTBP2	2.53513	CM	12
CV1_13	CV1	Q14767	LTBP2	LTBP2	2.94852	CM	13
C237_14	C237	Q14767	LTBP2	LTBP2	2.26299	CM	14
CV2_15	CV2	Q14767	LTBP2	LTBP2	2.89117	CM	15
C189_16	C189	Q14767	LTBP2	LTBP2	1.74535	CM	16
CV42_17	CV42	Q14767	LTBP2	LTBP2	3.61055	CM	17
CV79_18	CV79	Q14767	LTBP2	LTBP2	2.62137	CM	18
CV3_19	CV3	Q14767	LTBP2	LTBP2	2.16708	CM	19
CV36_20	CV36	Q14767	LTBP2	LTBP2	2.16088	CM	20
CV55_21	CV55	Q14767	LTBP2	LTBP2	2.65145	CM	21
C246_22	C246	Q14767	LTBP2	LTBP2	1.67038	CM	22
CV30_23	CV30	Q14767	LTBP2	LTBP2	2.45726	CM	23
CV19_24	CV19	Q14767	LTBP2	LTBP2	2.67379	CM	24
CV13_25	CV13	Q14767	LTBP2	LTBP2	2.8269	CM	25
C137_26	C137	Q14767	LTBP2	LTBP2	2.24644	CM	26
CV47_27	CV47	Q14767	LTBP2	LTBP2	4.20811	CM	27
CV29_28	CV29	Q14767	LTBP2	LTBP2	2.66018	CM	28
CV14_29	CV14	Q14767	LTBP2	LTBP2	3.20008	CM	29
CV56_30	CV56	Q14767	LTBP2	LTBP2	2.77281	CM	30
CV82_31	CV82	Q14767	LTBP2	LTBP2	3.21928	CM	31
CV23_32	CV23	Q14767	LTBP2	LTBP2	2.13403	CM	32
CV37_33	CV37	Q14767	LTBP2	LTBP2	3.27999	CM	33
CV34_34	CV34	Q14767	LTBP2	LTBP2	2.33756	CM	34
CV58_35	CV58	Q14767	LTBP2	LTBP2	3.04463	CM	35
CV22_36	CV22	Q14767	LTBP2	LTBP2	3.74899	CM	36
CV65_37	CV65	Q14767	LTBP2	LTBP2	3.30247	CM	37
CV79_38	CV79	Q14767	LTBP2	LTBP2	2.32212	CM	38
CV1_39	CV1	Q14767	LTBP2	LTBP2	2.65237	CM	39
CV51_40	CV51	Q14767	LTBP2	LTBP2	3.47799	CM	40
CV42_41	CV42	Q14767	LTBP2	LTBP2	3.90598	CM	41
CV19_42	CV19	Q14767	LTBP2	LTBP2	3.34542	CM	42
CV70_43	CV70	Q14767	LTBP2	LTBP2	3.7768	CM	43
C78_44	C78	Q14767	LTBP2	LTBP2	4.80068	CM	44
CV10_45	CV10	Q14767	LTBP2	LTBP2	3.0005	CM	45
CV8_46	CV8	Q14767	LTBP2	LTBP2	2.06666	CM	46
CV60_47	CV60	Q14767	LTBP2	LTBP2	2.49608	CM	47
CV35_48	CV35	Q14767	LTBP2	LTBP2	2.74238	CM	48
CV48_49	CV48	Q14767	LTBP2	LTBP2	3.28028	CM	49
CV76_50	CV76	Q14767	LTBP2	LTBP2	3.24731	CM	50
CV12_51	CV12	Q14767	LTBP2	LTBP2	3.87984	CM	51
C58_52	C58	Q14767	LTBP2	LTBP2	2.49947	CM	52
CV53_53	CV53	Q14767	LTBP2	LTBP2	2.61368	CM	53
CV50_54	CV50	Q14767	LTBP2	LTBP2	3.02934	CM	54
CV32_56	CV32	Q14767	LTBP2	LTBP2	3.65096	CM	56
C197_57	C197	Q14767	LTBP2	LTBP2	2.37572	CM	57
CV18_58	CV18	Q14767	LTBP2	LTBP2	2.91723	CM	58
CV29_59	CV29	Q14767	LTBP2	LTBP2	3.18783	CM	59
CV34_60	CV34	Q14767	LTBP2	LTBP2	2.78074	CM	60
CV41_61	CV41	Q14767	LTBP2	LTBP2	3.2533	CM	61
CV9_62	CV9	Q14767	LTBP2	LTBP2	2.28734	CM	62
CV74_63	CV74	Q14767	LTBP2	LTBP2	2.95771	CM	63
CV16_64	CV16	Q14767	LTBP2	LTBP2	3.14783	CM	64
CV21_1	CV21	P16871	IL7R	IL7R	1.95194	CM	1
C161_2	C161	P16871	IL7R	IL7R	2.3189	CM	2
C173_3	C173	P16871	IL7R	IL7R	1.94922	CM	3
CV11_4	CV11	P16871	IL7R	IL7R	1.40838	CM	4
CV59_5	CV59	P16871	IL7R	IL7R	0.55213	CM	5
C193_6	C193	P16871	IL7R	IL7R	0.70832	CM	6
C33_7	C33	P16871	IL7R	IL7R	1.99638	CM	7
CV39_8	CV39	P16871	IL7R	IL7R	0.85384	CM	8
CV6_9	CV6	P16871	IL7R	IL7R	2.41206	CM	9
CV38_10	CV38	P16871	IL7R	IL7R	0.91411	CM	10
CV4_11	CV4	P16871	IL7R	IL7R	2.22683	CM	11
C195_12	C195	P16871	IL7R	IL7R	2.35541	CM	12
CV1_13	CV1	P16871	IL7R	IL7R	1.40937	CM	13
C237_14	C237	P16871	IL7R	IL7R	1.7718	CM	14
CV2_15	CV2	P16871	IL7R	IL7R	1.17745	CM	15
C189_16	C189	P16871	IL7R	IL7R	2.03227	CM	16
CV42_17	CV42	P16871	IL7R	IL7R	2.44027	CM	17
CV79_18	CV79	P16871	IL7R	IL7R	2.09547	CM	18
CV3_19	CV3	P16871	IL7R	IL7R	2.18617	CM	19
CV36_20	CV36	P16871	IL7R	IL7R	1.08276	CM	20
CV55_21	CV55	P16871	IL7R	IL7R	0.76774	CM	21
C246_22	C246	P16871	IL7R	IL7R	1.76894	CM	22
CV30_23	CV30	P16871	IL7R	IL7R	1.50548	CM	23
CV19_24	CV19	P16871	IL7R	IL7R	1.02217	CM	24
CV13_25	CV13	P16871	IL7R	IL7R	2.29423	CM	25
C137_26	C137	P16871	IL7R	IL7R	1.7314	CM	26
CV47_27	CV47	P16871	IL7R	IL7R	1.59602	CM	27
CV29_28	CV29	P16871	IL7R	IL7R	2.04936	CM	28
CV14_29	CV14	P16871	IL7R	IL7R	2.07464	CM	29
CV56_30	CV56	P16871	IL7R	IL7R	1.65066	CM	30
CV82_31	CV82	P16871	IL7R	IL7R	1.71304	CM	31
CV23_32	CV23	P16871	IL7R	IL7R	1.75594	CM	32
CV37_33	CV37	P16871	IL7R	IL7R	2.79495	CM	33
CV34_34	CV34	P16871	IL7R	IL7R	1.51724	CM	34
CV58_35	CV58	P16871	IL7R	IL7R	2.55401	CM	35
CV22_36	CV22	P16871	IL7R	IL7R	2.11653	CM	36
CV65_37	CV65	P16871	IL7R	IL7R	1.77836	CM	37
CV79_38	CV79	P16871	IL7R	IL7R	1.68779	CM	38
CV1_39	CV1	P16871	IL7R	IL7R	0.64566	CM	39
CV51_40	CV51	P16871	IL7R	IL7R	1.19153	CM	40
CV42_41	CV42	P16871	IL7R	IL7R	2.71864	CM	41
CV19_42	CV19	P16871	IL7R	IL7R	2.03411	CM	42
CV70_43	CV70	P16871	IL7R	IL7R	1.75828	CM	43
C78_44	C78	P16871	IL7R	IL7R	2.76373	CM	44
CV10_45	CV10	P16871	IL7R	IL7R	1.8827	CM	45
CV8_46	CV8	P16871	IL7R	IL7R	1.40024	CM	46
CV60_47	CV60	P16871	IL7R	IL7R	1.59888	CM	47
CV35_48	CV35	P16871	IL7R	IL7R	2.01812	CM	48
CV48_49	CV48	P16871	IL7R	IL7R	1.22249	CM	49
CV76_50	CV76	P16871	IL7R	IL7R	1.82528	CM	50
CV12_51	CV12	P16871	IL7R	IL7R	1.87886	CM	51
C58_52	C58	P16871	IL7R	IL7R	1.9224	CM	52
CV53_53	CV53	P16871	IL7R	IL7R	2.54181	CM	53
CV50_54	CV50	P16871	IL7R	IL7R	1.49638	CM	54
CV32_56	CV32	P16871	IL7R	IL7R	1.49457	CM	56
C197_57	C197	P16871	IL7R	IL7R	2.86539	CM	57
CV18_58	CV18	P16871	IL7R	IL7R	2.14165	CM	58
CV29_59	CV29	P16871	IL7R	IL7R	1.78571	CM	59
CV34_60	CV34	P16871	IL7R	IL7R	1.58319	CM	60
CV41_61	CV41	P16871	IL7R	IL7R	1.2772	CM	61
CV9_62	CV9	P16871	IL7R	IL7R	1.26711	CM	62
CV74_63	CV74	P16871	IL7R	IL7R	1.47178	CM	63
CV16_64	CV16	P16871	IL7R	IL7R	1.56831	CM	64
CV21_1	CV21	P19320	VCAM1	VCAM1	7.29787	CM	1
C161_2	C161	P19320	VCAM1	VCAM1	5.66851	CM	2
C173_3	C173	P19320	VCAM1	VCAM1	5.40608	CM	3
CV11_4	CV11	P19320	VCAM1	VCAM1	5.29467	CM	4
CV59_5	CV59	P19320	VCAM1	VCAM1	5.82288	CM	5
C193_6	C193	P19320	VCAM1	VCAM1	5.19721	CM	6
C33_7	C33	P19320	VCAM1	VCAM1	4.72617	CM	7
CV39_8	CV39	P19320	VCAM1	VCAM1	5.79283	CM	8
CV6_9	CV6	P19320	VCAM1	VCAM1	5.95706	CM	9
CV38_10	CV38	P19320	VCAM1	VCAM1	6.46818	CM	10
CV4_11	CV4	P19320	VCAM1	VCAM1	6.09483	CM	11
C195_12	C195	P19320	VCAM1	VCAM1	5.7781	CM	12
CV1_13	CV1	P19320	VCAM1	VCAM1	6.52979	CM	13
C237_14	C237	P19320	VCAM1	VCAM1	5.36307	CM	14
CV2_15	CV2	P19320	VCAM1	VCAM1	5.53461	CM	15
C189_16	C189	P19320	VCAM1	VCAM1	5.09601	CM	16
CV42_17	CV42	P19320	VCAM1	VCAM1	6.22413	CM	17
CV79_18	CV79	P19320	VCAM1	VCAM1	6.2819	CM	18
CV3_19	CV3	P19320	VCAM1	VCAM1	5.12166	CM	19
CV36_20	CV36	P19320	VCAM1	VCAM1	6.83216	CM	20
CV55_21	CV55	P19320	VCAM1	VCAM1	6.73957	CM	21
C246_22	C246	P19320	VCAM1	VCAM1	4.86585	CM	22
CV30_23	CV30	P19320	VCAM1	VCAM1	5.31057	CM	23
CV19_24	CV19	P19320	VCAM1	VCAM1	5.98356	CM	24
CV13_25	CV13	P19320	VCAM1	VCAM1	5.75491	CM	25
C137_26	C137	P19320	VCAM1	VCAM1	5.28269	CM	26
CV47_27	CV47	P19320	VCAM1	VCAM1	6.79872	CM	27
CV29_28	CV29	P19320	VCAM1	VCAM1	6.62276	CM	28
CV14_29	CV14	P19320	VCAM1	VCAM1	6.12011	CM	29
CV56_30	CV56	P19320	VCAM1	VCAM1	5.78376	CM	30
CV82_31	CV82	P19320	VCAM1	VCAM1	6.30938	CM	31
CV23_32	CV23	P19320	VCAM1	VCAM1	5.47545	CM	32
CV37_33	CV37	P19320	VCAM1	VCAM1	7.18891	CM	33
CV34_34	CV34	P19320	VCAM1	VCAM1	6.36513	CM	34
CV58_35	CV58	P19320	VCAM1	VCAM1	6.63734	CM	35
CV22_36	CV22	P19320	VCAM1	VCAM1	6.83145	CM	36
CV65_37	CV65	P19320	VCAM1	VCAM1	6.20399	CM	37
CV79_38	CV79	P19320	VCAM1	VCAM1	5.87589	CM	38
CV1_39	CV1	P19320	VCAM1	VCAM1	5.56935	CM	39
CV51_40	CV51	P19320	VCAM1	VCAM1	6.25617	CM	40
CV42_41	CV42	P19320	VCAM1	VCAM1	7.03139	CM	41
CV19_42	CV19	P19320	VCAM1	VCAM1	6.45555	CM	42
CV70_43	CV70	P19320	VCAM1	VCAM1	6.92508	CM	43
C78_44	C78	P19320	VCAM1	VCAM1	7.08909	CM	44
CV10_45	CV10	P19320	VCAM1	VCAM1	5.50873	CM	45
CV8_46	CV8	P19320	VCAM1	VCAM1	5.74328	CM	46
CV60_47	CV60	P19320	VCAM1	VCAM1	6.28806	CM	47
CV35_48	CV35	P19320	VCAM1	VCAM1	6.83255	CM	48
CV48_49	CV48	P19320	VCAM1	VCAM1	6.48616	CM	49
CV76_50	CV76	P19320	VCAM1	VCAM1	6.13297	CM	50
CV12_51	CV12	P19320	VCAM1	VCAM1	6.53033	CM	51
C58_52	C58	P19320	VCAM1	VCAM1	6.03947	CM	52
CV53_53	CV53	P19320	VCAM1	VCAM1	7.08717	CM	53
CV50_54	CV50	P19320	VCAM1	VCAM1	6.54388	CM	54
CV32_56	CV32	P19320	VCAM1	VCAM1	6.43067	CM	56
C197_57	C197	P19320	VCAM1	VCAM1	5.67755	CM	57
CV18_58	CV18	P19320	VCAM1	VCAM1	6.41126	CM	58
CV29_59	CV29	P19320	VCAM1	VCAM1	6.63632	CM	59
CV34_60	CV34	P19320	VCAM1	VCAM1	6.4325	CM	60
CV41_61	CV41	P19320	VCAM1	VCAM1	6.14428	CM	61
CV9_62	CV9	P19320	VCAM1	VCAM1	5.86169	CM	62
CV74_63	CV74	P19320	VCAM1	VCAM1	6.68153	CM	63
CV16_64	CV16	P19320	VCAM1	VCAM1	5.56148	CM	64
CV21_1	CV21	P14151	SELL	SELL	8.86644	CM	1
C161_2	C161	P14151	SELL	SELL	7.33222	CM	2
C173_3	C173	P14151	SELL	SELL	8.31473	CM	3
CV11_4	CV11	P14151	SELL	SELL	8.14362	CM	4
CV59_5	CV59	P14151	SELL	SELL	8.56538	CM	5
C193_6	C193	P14151	SELL	SELL	7.67057	CM	6
C33_7	C33	P14151	SELL	SELL	7.12145	CM	7
CV39_8	CV39	P14151	SELL	SELL	8.40823	CM	8
CV6_9	CV6	P14151	SELL	SELL	8.1502	CM	9
CV38_10	CV38	P14151	SELL	SELL	8.95191	CM	10
CV4_11	CV4	P14151	SELL	SELL	8.43641	CM	11
C195_12	C195	P14151	SELL	SELL	7.7805	CM	12
CV1_13	CV1	P14151	SELL	SELL	8.011	CM	13
C237_14	C237	P14151	SELL	SELL	7.39024	CM	14
CV2_15	CV2	P14151	SELL	SELL	7.72813	CM	15
C189_16	C189	P14151	SELL	SELL	8.21544	CM	16
CV42_17	CV42	P14151	SELL	SELL	8.66434	CM	17
CV79_18	CV79	P14151	SELL	SELL	8.67909	CM	18
CV3_19	CV3	P14151	SELL	SELL	8.45122	CM	19
CV36_20	CV36	P14151	SELL	SELL	9.19367	CM	20
CV55_21	CV55	P14151	SELL	SELL	8.46363	CM	21
C246_22	C246	P14151	SELL	SELL	7.95859	CM	22
CV30_23	CV30	P14151	SELL	SELL	8.59906	CM	23
CV19_24	CV19	P14151	SELL	SELL	7.69924	CM	24
CV13_25	CV13	P14151	SELL	SELL	8.86792	CM	25
C137_26	C137	P14151	SELL	SELL	8.26133	CM	26
CV47_27	CV47	P14151	SELL	SELL	8.35693	CM	27
CV29_28	CV29	P14151	SELL	SELL	7.99946	CM	28
CV14_29	CV14	P14151	SELL	SELL	8.01515	CM	29
CV56_30	CV56	P14151	SELL	SELL	8.06436	CM	30
CV82_31	CV82	P14151	SELL	SELL	8.69056	CM	31
CV23_32	CV23	P14151	SELL	SELL	7.89428	CM	32
CV37_33	CV37	P14151	SELL	SELL	9.30301	CM	33
CV34_34	CV34	P14151	SELL	SELL	8.3235	CM	34
CV58_35	CV58	P14151	SELL	SELL	8.71172	CM	35
CV22_36	CV22	P14151	SELL	SELL	8.58879	CM	36
CV65_37	CV65	P14151	SELL	SELL	8.52392	CM	37
CV79_38	CV79	P14151	SELL	SELL	8.21643	CM	38
CV1_39	CV1	P14151	SELL	SELL	8.21306	CM	39
CV51_40	CV51	P14151	SELL	SELL	8.43307	CM	40
CV42_41	CV42	P14151	SELL	SELL	8.93967	CM	41
CV19_42	CV19	P14151	SELL	SELL	8.19722	CM	42
CV70_43	CV70	P14151	SELL	SELL	8.26273	CM	43
C78_44	C78	P14151	SELL	SELL	8.59571	CM	44
CV10_45	CV10	P14151	SELL	SELL	7.60746	CM	45
CV8_46	CV8	P14151	SELL	SELL	7.28111	CM	46
CV60_47	CV60	P14151	SELL	SELL	8.89158	CM	47
CV35_48	CV35	P14151	SELL	SELL	8.52631	CM	48
CV48_49	CV48	P14151	SELL	SELL	8.65801	CM	49
CV76_50	CV76	P14151	SELL	SELL	8.24505	CM	50
CV12_51	CV12	P14151	SELL	SELL	8.5606	CM	51
C58_52	C58	P14151	SELL	SELL	8.59063	CM	52
CV53_53	CV53	P14151	SELL	SELL	8.93762	CM	53
CV50_54	CV50	P14151	SELL	SELL	8.52549	CM	54
CV32_56	CV32	P14151	SELL	SELL	7.38818	CM	56
C197_57	C197	P14151	SELL	SELL	8.39685	CM	57
CV18_58	CV18	P14151	SELL	SELL	8.83507	CM	58
CV29_59	CV29	P14151	SELL	SELL	8.28883	CM	59
CV34_60	CV34	P14151	SELL	SELL	8.15033	CM	60
CV41_61	CV41	P14151	SELL	SELL	8.17984	CM	61
CV9_62	CV9	P14151	SELL	SELL	8.6065	CM	62
CV74_63	CV74	P14151	SELL	SELL	8.87356	CM	63
CV16_64	CV16	P14151	SELL	SELL	7.46098	CM	64
CV21_1	CV21	P49747	COMP	COMP	9.1559	CM	1
C161_2	C161	P49747	COMP	COMP	6.73006	CM	2
C173_3	C173	P49747	COMP	COMP	8.83772	CM	3
CV11_4	CV11	P49747	COMP	COMP	8.2772	CM	4
CV59_5	CV59	P49747	COMP	COMP	7.30653	CM	5
C193_6	C193	P49747	COMP	COMP	6.58432	CM	6
C33_7	C33	P49747	COMP	COMP	7.9516	CM	7
CV39_8	CV39	P49747	COMP	COMP	7.0551	CM	8
CV6_9	CV6	P49747	COMP	COMP	9.16009	CM	9
CV38_10	CV38	P49747	COMP	COMP	7.64338	CM	10
CV4_11	CV4	P49747	COMP	COMP	6.33397	CM	11
C195_12	C195	P49747	COMP	COMP	8.409	CM	12
CV1_13	CV1	P49747	COMP	COMP	7.56922	CM	13
C237_14	C237	P49747	COMP	COMP	9.01518	CM	14
CV2_15	CV2	P49747	COMP	COMP	7.10796	CM	15
C189_16	C189	P49747	COMP	COMP	7.16117	CM	16
CV42_17	CV42	P49747	COMP	COMP	8.66787	CM	17
CV79_18	CV79	P49747	COMP	COMP	8.03413	CM	18
CV3_19	CV3	P49747	COMP	COMP	7.68256	CM	19
CV36_20	CV36	P49747	COMP	COMP	5.87448	CM	20
CV55_21	CV55	P49747	COMP	COMP	6.93197	CM	21
C246_22	C246	P49747	COMP	COMP	7.85859	CM	22
CV30_23	CV30	P49747	COMP	COMP	7.17013	CM	23
CV19_24	CV19	P49747	COMP	COMP	6.9872	CM	24
CV13_25	CV13	P49747	COMP	COMP	8.32596	CM	25
C137_26	C137	P49747	COMP	COMP	7.57048	CM	26
CV47_27	CV47	P49747	COMP	COMP	8.90791	CM	27
CV29_28	CV29	P49747	COMP	COMP	7.26549	CM	28
CV14_29	CV14	P49747	COMP	COMP	8.59346	CM	29
CV56_30	CV56	P49747	COMP	COMP	9.38515	CM	30
CV82_31	CV82	P49747	COMP	COMP	7.32531	CM	31
CV23_32	CV23	P49747	COMP	COMP	8.12139	CM	32
CV37_33	CV37	P49747	COMP	COMP	8.1168	CM	33
CV34_34	CV34	P49747	COMP	COMP	7.45658	CM	34
CV58_35	CV58	P49747	COMP	COMP	8.83139	CM	35
CV22_36	CV22	P49747	COMP	COMP	10.74384	CM	36
CV65_37	CV65	P49747	COMP	COMP	9.04367	CM	37
CV79_38	CV79	P49747	COMP	COMP	7.5989	CM	38
CV1_39	CV1	P49747	COMP	COMP	6.53151	CM	39
CV51_40	CV51	P49747	COMP	COMP	6.9481	CM	40
CV42_41	CV42	P49747	COMP	COMP	9.42773	CM	41
CV19_42	CV19	P49747	COMP	COMP	7.92553	CM	42
CV70_43	CV70	P49747	COMP	COMP	8.99539	CM	43
C78_44	C78	P49747	COMP	COMP	10.44531	CM	44
CV10_45	CV10	P49747	COMP	COMP	6.95024	CM	45
CV8_46	CV8	P49747	COMP	COMP	7.76236	CM	46
CV60_47	CV60	P49747	COMP	COMP	7.8118	CM	47
CV35_48	CV35	P49747	COMP	COMP	6.87586	CM	48
CV48_49	CV48	P49747	COMP	COMP	7.21354	CM	49
CV76_50	CV76	P49747	COMP	COMP	9.10938	CM	50
CV12_51	CV12	P49747	COMP	COMP	8.36599	CM	51
C58_52	C58	P49747	COMP	COMP	7.71527	CM	52
CV53_53	CV53	P49747	COMP	COMP	8.55891	CM	53
CV50_54	CV50	P49747	COMP	COMP	8.22075	CM	54
CV32_56	CV32	P49747	COMP	COMP	8.59667	CM	56
C197_57	C197	P49747	COMP	COMP	8.31451	CM	57
CV18_58	CV18	P49747	COMP	COMP	8.64518	CM	58
CV29_59	CV29	P49747	COMP	COMP	6.87433	CM	59
CV34_60	CV34	P49747	COMP	COMP	7.75904	CM	60
CV41_61	CV41	P49747	COMP	COMP	8.28368	CM	61
CV9_62	CV9	P49747	COMP	COMP	7.21423	CM	62
CV74_63	CV74	P49747	COMP	COMP	8.52804	CM	63
CV16_64	CV16	P49747	COMP	COMP	8.67434	CM	64
CV21_1	CV21	P22748	CA4	CA4	2.97442	CM	1
C161_2	C161	P22748	CA4	CA4	1.92282	CM	2
C173_3	C173	P22748	CA4	CA4	1.9336	CM	3
CV11_4	CV11	P22748	CA4	CA4	2.62198	CM	4
CV59_5	CV59	P22748	CA4	CA4	2.58851	CM	5
C193_6	C193	P22748	CA4	CA4	1.69267	CM	6
C33_7	C33	P22748	CA4	CA4	1.44301	CM	7
CV39_8	CV39	P22748	CA4	CA4	2.39651	CM	8
CV6_9	CV6	P22748	CA4	CA4	1.76711	CM	9
CV38_10	CV38	P22748	CA4	CA4	3.1956	CM	10
CV4_11	CV4	P22748	CA4	CA4	2.70168	CM	11
C195_12	C195	P22748	CA4	CA4	1.80587	CM	12
CV1_13	CV1	P22748	CA4	CA4	1.97886	CM	13
C237_14	C237	P22748	CA4	CA4	2.36044	CM	14
CV2_15	CV2	P22748	CA4	CA4	1.94677	CM	15
C189_16	C189	P22748	CA4	CA4	1.69395	CM	16
CV42_17	CV42	P22748	CA4	CA4	2.81305	CM	17
CV79_18	CV79	P22748	CA4	CA4	1.88504	CM	18
CV3_19	CV3	P22748	CA4	CA4	1.78325	CM	19
CV36_20	CV36	P22748	CA4	CA4	2.64585	CM	20
CV55_21	CV55	P22748	CA4	CA4	3.27897	CM	21
C246_22	C246	P22748	CA4	CA4	2.12059	CM	22
CV30_23	CV30	P22748	CA4	CA4	2.63074	CM	23
CV19_24	CV19	P22748	CA4	CA4	1.98443	CM	24
CV13_25	CV13	P22748	CA4	CA4	2.80768	CM	25
C137_26	C137	P22748	CA4	CA4	1.3573	CM	26
CV47_27	CV47	P22748	CA4	CA4	2.21392	CM	27
CV29_28	CV29	P22748	CA4	CA4	2.51186	CM	28
CV14_29	CV14	P22748	CA4	CA4	2.33551	CM	29
CV56_30	CV56	P22748	CA4	CA4	3.22048	CM	30
CV82_31	CV82	P22748	CA4	CA4	2.81952	CM	31
CV23_32	CV23	P22748	CA4	CA4	1.78003	CM	32
CV37_33	CV37	P22748	CA4	CA4	2.416	CM	33
CV34_34	CV34	P22748	CA4	CA4	2.69094	CM	34
CV58_35	CV58	P22748	CA4	CA4	2.84615	CM	35
CV22_36	CV22	P22748	CA4	CA4	1.73796	CM	36
CV65_37	CV65	P22748	CA4	CA4	1.6349	CM	37
CV79_38	CV79	P22748	CA4	CA4	1.49135	CM	38
CV1_39	CV1	P22748	CA4	CA4	2.27086	CM	39
CV51_40	CV51	P22748	CA4	CA4	1.82923	CM	40
CV42_41	CV42	P22748	CA4	CA4	2.50238	CM	41
CV19_42	CV19	P22748	CA4	CA4	2.7225	CM	42
CV70_43	CV70	P22748	CA4	CA4	3.3649	CM	43
C78_44	C78	P22748	CA4	CA4	2.82198	CM	44
CV10_45	CV10	P22748	CA4	CA4	1.78114	CM	45
CV8_46	CV8	P22748	CA4	CA4	2.14032	CM	46
CV60_47	CV60	P22748	CA4	CA4	2.56147	CM	47
CV35_48	CV35	P22748	CA4	CA4	2.1547	CM	48
CV48_49	CV48	P22748	CA4	CA4	2.29767	CM	49
CV76_50	CV76	P22748	CA4	CA4	1.56399	CM	50
CV12_51	CV12	P22748	CA4	CA4	2.69512	CM	51
C58_52	C58	P22748	CA4	CA4	2.0772	CM	52
CV53_53	CV53	P22748	CA4	CA4	2.64501	CM	53
CV50_54	CV50	P22748	CA4	CA4	2.29514	CM	54
CV32_56	CV32	P22748	CA4	CA4	1.7494	CM	56
C197_57	C197	P22748	CA4	CA4	1.78062	CM	57
CV18_58	CV18	P22748	CA4	CA4	3.21508	CM	58
CV29_59	CV29	P22748	CA4	CA4	2.66612	CM	59
CV34_60	CV34	P22748	CA4	CA4	2.42792	CM	60
CV41_61	CV41	P22748	CA4	CA4	1.99158	CM	61
CV9_62	CV9	P22748	CA4	CA4	2.6301	CM	62
CV74_63	CV74	P22748	CA4	CA4	1.85739	CM	63
CV16_64	CV16	P22748	CA4	CA4	2.17351	CM	64
CV21_1	CV21	Q13332	PTPRS	PTPRS	1.28665	CM	1
C161_2	C161	Q13332	PTPRS	PTPRS	1.14348	CM	2
C173_3	C173	Q13332	PTPRS	PTPRS	1.00438	CM	3
CV11_4	CV11	Q13332	PTPRS	PTPRS	1.0906	CM	4
CV59_5	CV59	Q13332	PTPRS	PTPRS	0.71485	CM	5
C193_6	C193	Q13332	PTPRS	PTPRS	0.96337	CM	6
C33_7	C33	Q13332	PTPRS	PTPRS	0.50014	CM	7
CV39_8	CV39	Q13332	PTPRS	PTPRS	0.86989	CM	8
CV6_9	CV6	Q13332	PTPRS	PTPRS	1.50736	CM	9
CV38_10	CV38	Q13332	PTPRS	PTPRS	1.19197	CM	10
CV4_11	CV4	Q13332	PTPRS	PTPRS	0.58595	CM	11
C195_12	C195	Q13332	PTPRS	PTPRS	1.14359	CM	12
CV1_13	CV1	Q13332	PTPRS	PTPRS	0.82102	CM	13
C237_14	C237	Q13332	PTPRS	PTPRS	1.06018	CM	14
CV2_15	CV2	Q13332	PTPRS	PTPRS	0.8257	CM	15
C189_16	C189	Q13332	PTPRS	PTPRS	0.80942	CM	16
CV42_17	CV42	Q13332	PTPRS	PTPRS	1.52673	CM	17
CV79_18	CV79	Q13332	PTPRS	PTPRS	1.27433	CM	18
CV3_19	CV3	Q13332	PTPRS	PTPRS	0.96495	CM	19
CV36_20	CV36	Q13332	PTPRS	PTPRS	1.11412	CM	20
CV55_21	CV55	Q13332	PTPRS	PTPRS	0.83967	CM	21
C246_22	C246	Q13332	PTPRS	PTPRS	1.04928	CM	22
CV30_23	CV30	Q13332	PTPRS	PTPRS	0.66393	CM	23
CV19_24	CV19	Q13332	PTPRS	PTPRS	0.96394	CM	24
CV13_25	CV13	Q13332	PTPRS	PTPRS	1.38153	CM	25
C137_26	C137	Q13332	PTPRS	PTPRS	1.43717	CM	26
CV47_27	CV47	Q13332	PTPRS	PTPRS	1.39498	CM	27
CV29_28	CV29	Q13332	PTPRS	PTPRS	1.36127	CM	28
CV14_29	CV14	Q13332	PTPRS	PTPRS	1.23673	CM	29
CV56_30	CV56	Q13332	PTPRS	PTPRS	1.38637	CM	30
CV82_31	CV82	Q13332	PTPRS	PTPRS	1.14633	CM	31
CV23_32	CV23	Q13332	PTPRS	PTPRS	1.2733	CM	32
CV37_33	CV37	Q13332	PTPRS	PTPRS	2.06023	CM	33
CV34_34	CV34	Q13332	PTPRS	PTPRS	1.31796	CM	34
CV58_35	CV58	Q13332	PTPRS	PTPRS	1.90503	CM	35
CV22_36	CV22	Q13332	PTPRS	PTPRS	1.5473	CM	36
CV65_37	CV65	Q13332	PTPRS	PTPRS	1.28028	CM	37
CV79_38	CV79	Q13332	PTPRS	PTPRS	0.97132	CM	38
CV1_39	CV1	Q13332	PTPRS	PTPRS	0.9812	CM	39
CV51_40	CV51	Q13332	PTPRS	PTPRS	0.83287	CM	40
CV42_41	CV42	Q13332	PTPRS	PTPRS	1.44565	CM	41
CV19_42	CV19	Q13332	PTPRS	PTPRS	1.42179	CM	42
CV70_43	CV70	Q13332	PTPRS	PTPRS	1.47293	CM	43
C78_44	C78	Q13332	PTPRS	PTPRS	1.5198	CM	44
CV10_45	CV10	Q13332	PTPRS	PTPRS	1.02608	CM	45
CV8_46	CV8	Q13332	PTPRS	PTPRS	0.73915	CM	46
[truncated: 25,372 more rows]
