# Supplementary material for: Longitudinal proteomic profiling of dialysis patients with COVID-19 reveals markers of severity and predictors of death
Source: eLife journal article supplement (doi:10.7554/elife.64827), 2021-03-11
Supplement: supp [file elife-64827-supp-v1.zip › elife_poa_e64827_Source_data_4.csv]

SampleID	Individual_ID	Plate_ID	Case_Control	Sex	Ethnicity	Age
CV21_1	CV21	plate.5	POSITIVE	F	Other	(60,80]
C161_2	C161	plate.5	NEGATIVE	M	Other	(60,80]
C173_3	C173	plate.5	NEGATIVE	M	Black	(40,60]
CV11_4	CV11	plate.5	POSITIVE	M	Other	(40,60]
CV59_5	CV59	plate.5	POSITIVE	F	South Asian	(60,80]
C193_6	C193	plate.5	NEGATIVE	M	White	(80,100]
C33_7	C33	plate.5	NEGATIVE	M	South Asian	(60,80]
CV39_8	CV39	plate.5	POSITIVE	F	Black	(60,80]
CV6_9	CV6	plate.5	POSITIVE	M	South Asian	(40,60]
CV38_10	CV38	plate.5	POSITIVE	F	Asian (other)	(60,80]
CV4_11	CV4	plate.5	POSITIVE	M	Black	(80,100]
C195_12	C195	plate.5	NEGATIVE	M	Other	(80,100]
CV1_13	CV1	plate.5	POSITIVE	M	White	(80,100]
C237_14	C237	plate.5	NEGATIVE	M	South Asian	(60,80]
CV2_15	CV2	plate.5	POSITIVE	M	South Asian	(60,80]
C189_16	C189	plate.5	NEGATIVE	M	Black	(40,60]
CV42_17	CV42	plate.5	POSITIVE	F	Black	(40,60]
CV79_18	CV79	plate.5	POSITIVE	F	South Asian	(80,100]
CV3_19	CV3	plate.5	POSITIVE	M	Black	(60,80]
CV36_20	CV36	plate.5	POSITIVE	M	South Asian	(60,80]
CV55_21	CV55	plate.5	POSITIVE	M	White	(60,80]
C246_22	C246	plate.5	NEGATIVE	M	White	(60,80]
CV30_23	CV30	plate.5	POSITIVE	F	Other	(60,80]
CV19_24	CV19	plate.5	POSITIVE	M	South Asian	(40,60]
CV13_25	CV13	plate.5	POSITIVE	M	Black	(60,80]
C137_26	C137	plate.5	NEGATIVE	F	South Asian	(60,80]
CV47_27	CV47	plate.5	POSITIVE	M	Asian (other)	(80,100]
CV29_28	CV29	plate.5	POSITIVE	M	White	(60,80]
CV14_29	CV14	plate.5	POSITIVE	M	Asian (other)	(60,80]
CV56_30	CV56	plate.5	POSITIVE	M	Other	(60,80]
CV82_31	CV82	plate.5	POSITIVE	M	Other	(60,80]
CV23_32	CV23	plate.5	POSITIVE	F	Black	(60,80]
CV37_33	CV37	plate.5	POSITIVE	M	Other	(60,80]
CV34_34	CV34	plate.5	POSITIVE	M	Asian (other)	(80,100]
CV58_35	CV58	plate.5	POSITIVE	F	Asian (other)	(40,60]
CV22_36	CV22	plate.5	POSITIVE	M	South Asian	(60,80]
CV65_37	CV65	plate.5	POSITIVE	M	White	(80,100]
CV79_38	CV79	plate.5	POSITIVE	F	South Asian	(80,100]
CV1_39	CV1	plate.5	POSITIVE	M	White	(80,100]
CV51_40	CV51	plate.5	POSITIVE	M	Other	(40,60]
CV42_41	CV42	plate.5	POSITIVE	F	Black	(40,60]
CV19_42	CV19	plate.5	POSITIVE	M	South Asian	(40,60]
CV70_43	CV70	plate.5	POSITIVE	M	White	(60,80]
C78_44	C78	plate.5	POSITIVE	F	Black	(40,60]
CV10_45	CV10	plate.5	POSITIVE	M	White	(60,80]
CV8_46	CV8	plate.5	POSITIVE	F	White	(60,80]
CV60_47	CV60	plate.5	POSITIVE	F	South Asian	(60,80]
CV35_48	CV35	plate.5	POSITIVE	F	Other	(40,60]
CV48_49	CV48	plate.5	POSITIVE	M	Asian (other)	(60,80]
CV76_50	CV76	plate.5	POSITIVE	M	South Asian	(60,80]
CV12_51	CV12	plate.5	POSITIVE	M	Black	(40,60]
C58_52	C58	plate.5	NEGATIVE	F	White	(60,80]
CV53_53	CV53	plate.5	POSITIVE	F	South Asian	(60,80]
CV50_54	CV50	plate.5	POSITIVE	M	White	(40,60]
CV32_56	CV32	plate.5	POSITIVE	M	South Asian	(60,80]
C197_57	C197	plate.5	NEGATIVE	F	Black	(60,80]
CV18_58	CV18	plate.5	POSITIVE	M	White	(60,80]
CV29_59	CV29	plate.5	POSITIVE	M	White	(60,80]
CV34_60	CV34	plate.5	POSITIVE	M	Asian (other)	(80,100]
CV41_61	CV41	plate.5	POSITIVE	M	White	(60,80]
CV9_62	CV9	plate.5	POSITIVE	M	South Asian	(40,60]
CV74_63	CV74	plate.5	POSITIVE	M	White	(80,100]
CV16_64	CV16	plate.5	POSITIVE	M	Asian (other)	(60,80]
