# Supplementary figures and images for: Longitudinal proteomic profiling of dialysis patients with COVID-19 reveals markers of severity and predictors of death
Source: eLife journal article supplement (doi:10.7554/elife.64827), 2021-03-11

Figure 1 figure supplement 1

**a**

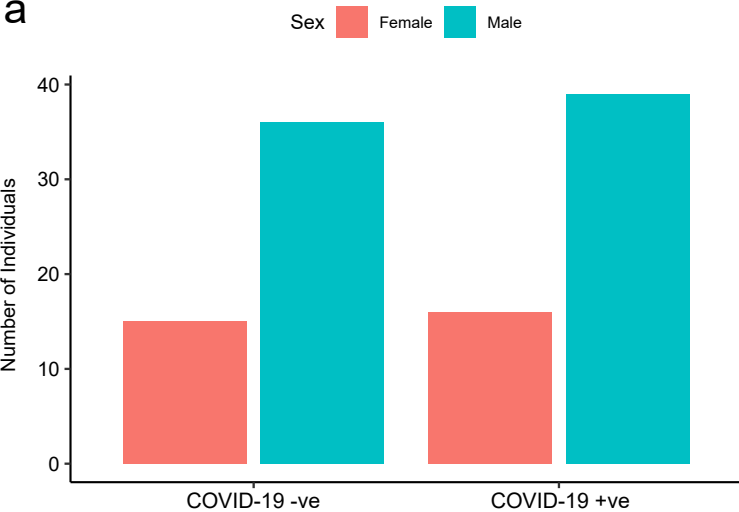

**b**

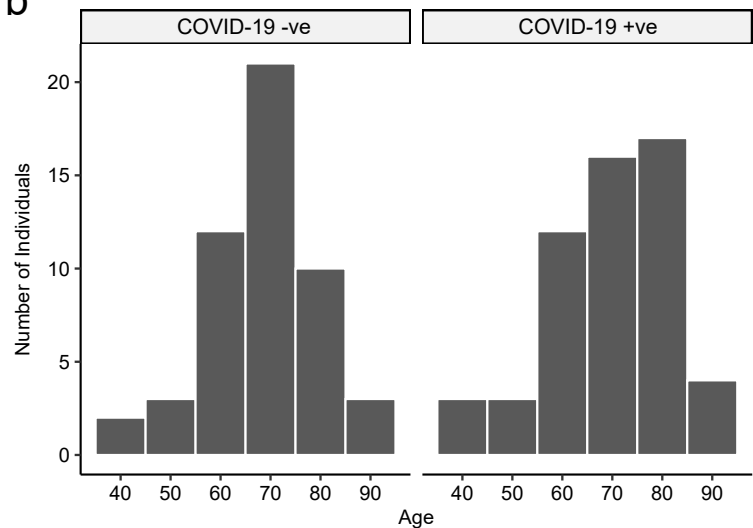

**c**

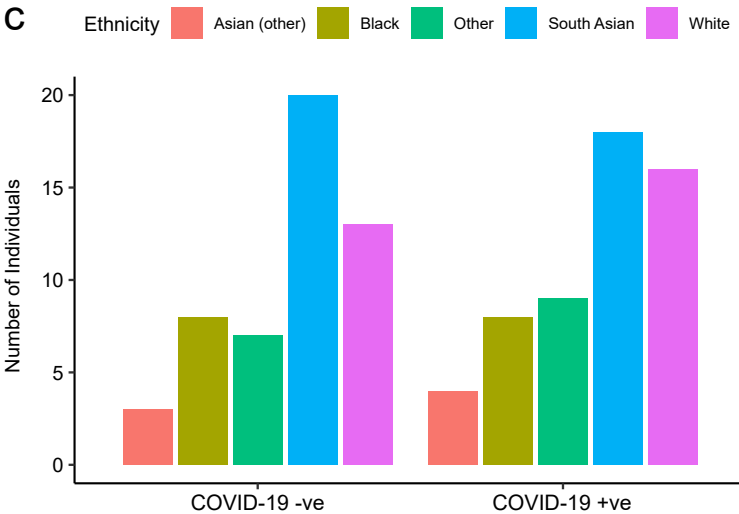

**d**

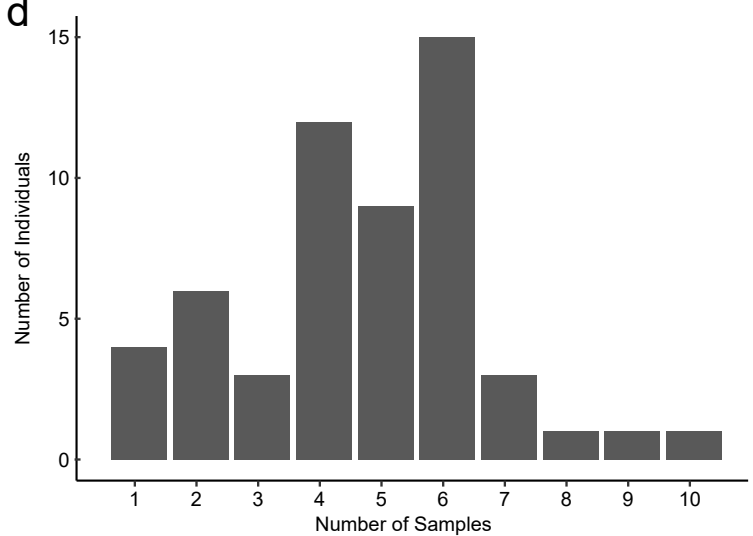

Supplement: supp [file elife-64827-supp-v1.zip › elife_poa_e64827_Figure_1_figure_supplement_1.pdf]

# Figure 2 figure supplement 1

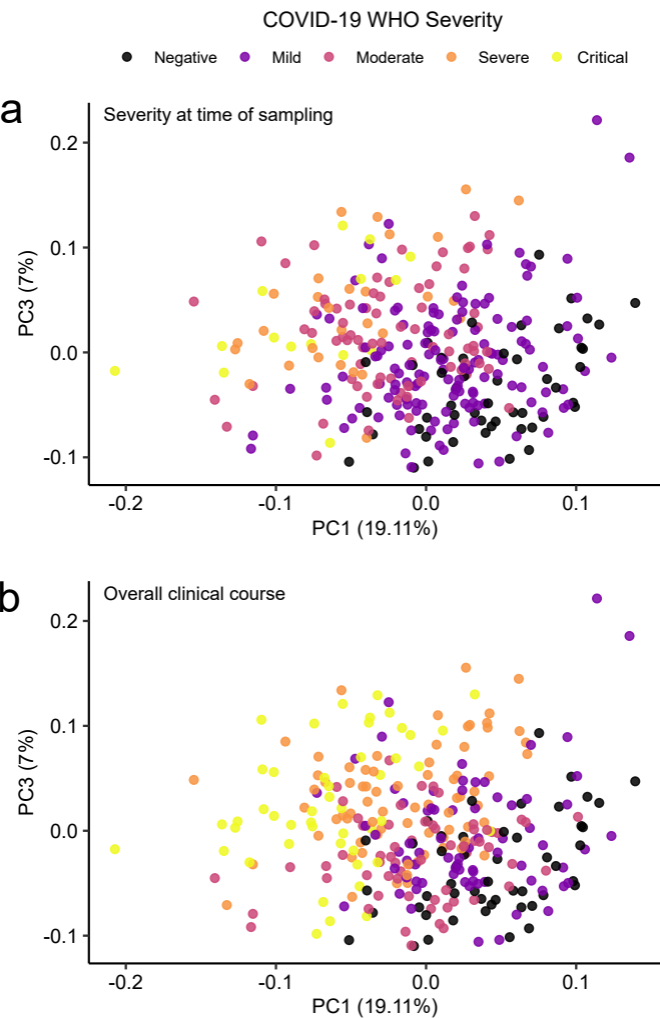

Supplement: supp [file elife-64827-supp-v1.zip › elife_poa_e64827_Figure_2_figure_supplement_1.pdf]

Figure 2 figure supplement 2

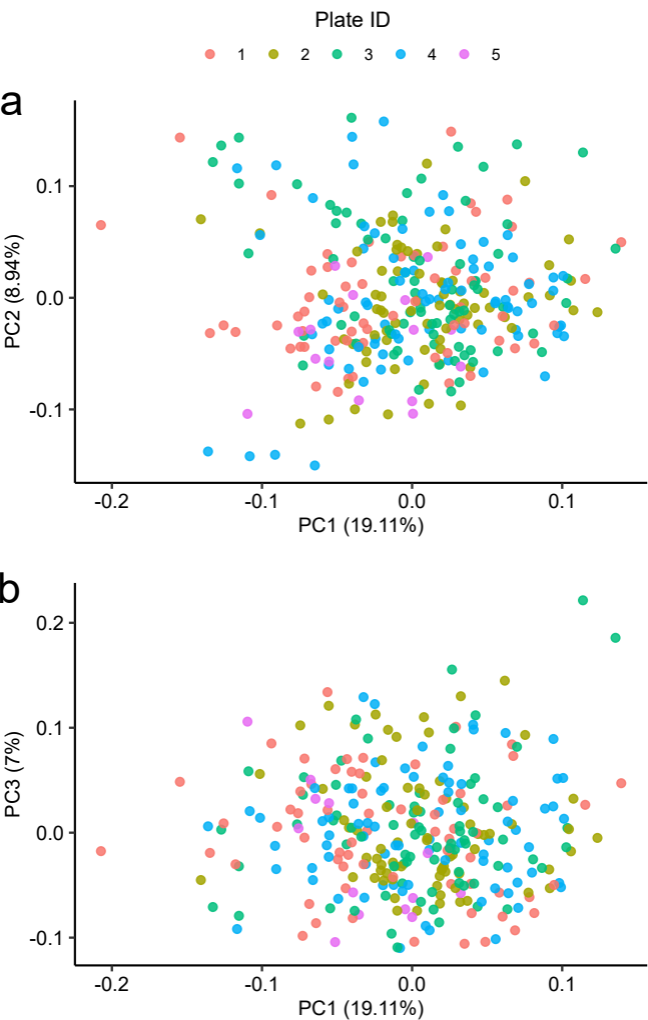

Supplement: supp [file elife-64827-supp-v1.zip › elife_poa_e64827_Figure_2_figure_supplement_2.pdf]

Figure 3 figure supplement 1

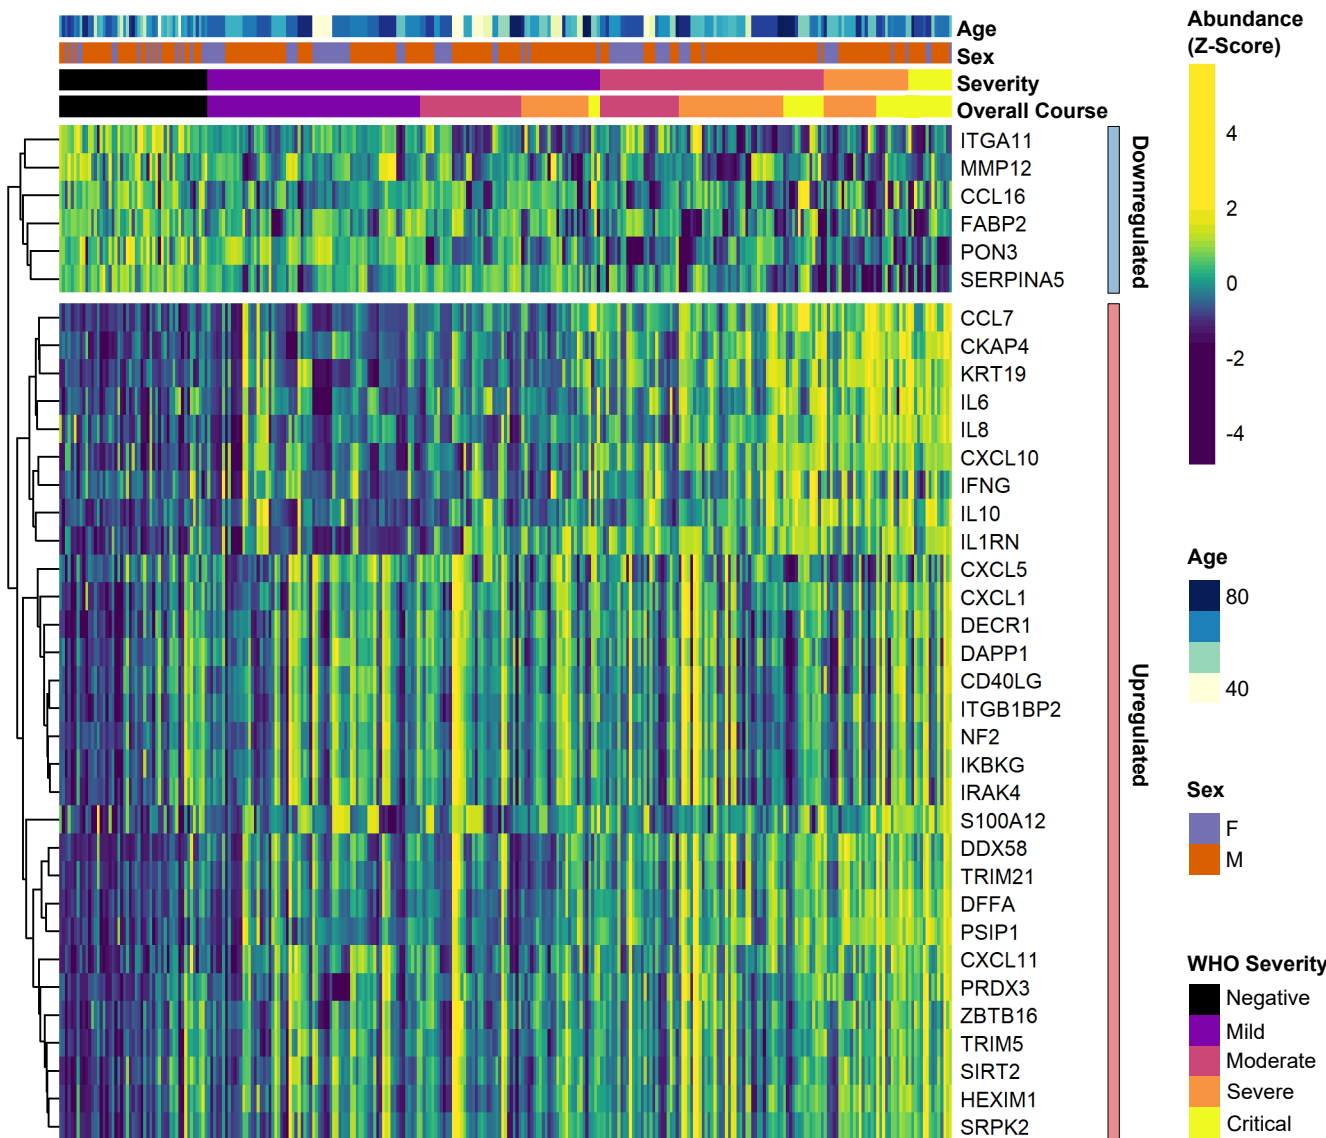

Supplement: supp [file elife-64827-supp-v1.zip › elife_poa_e64827_Figure_3_figure_supplement_1.pdf]

Figure 3 figure supplement 3

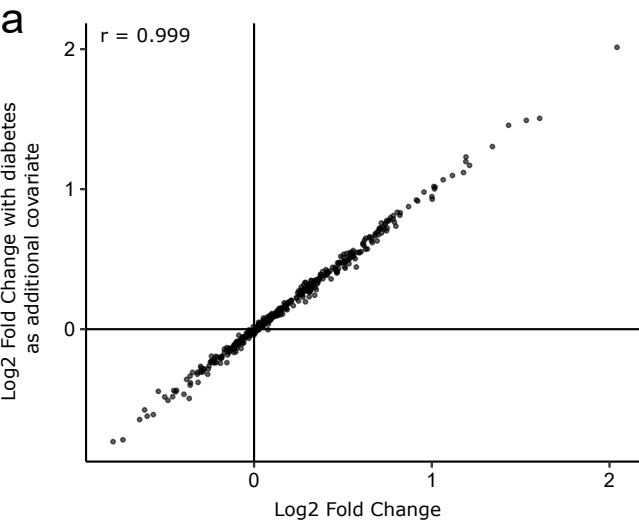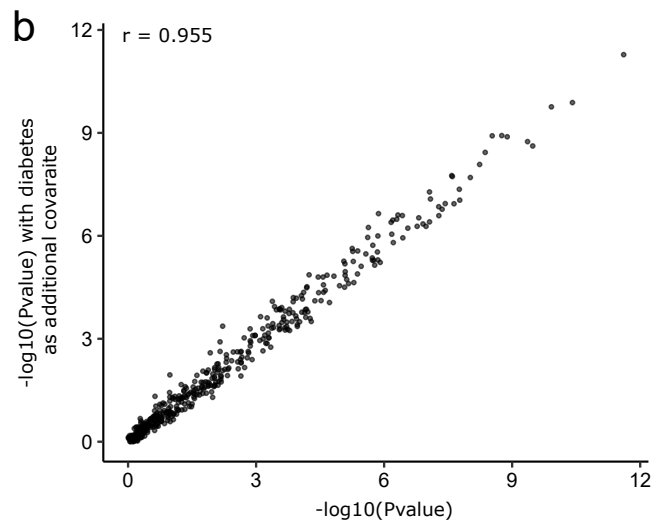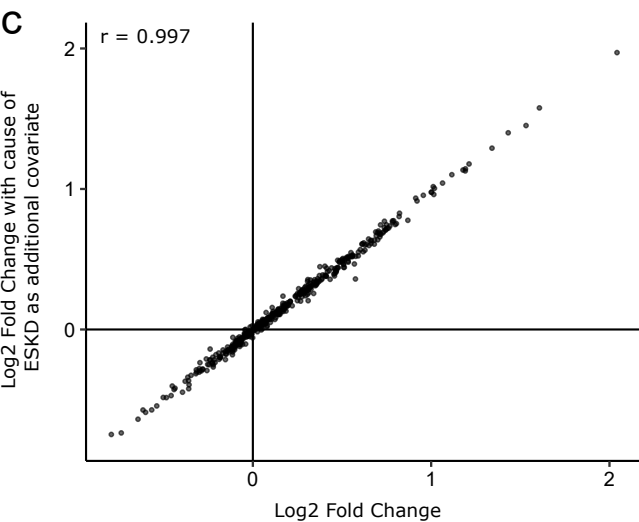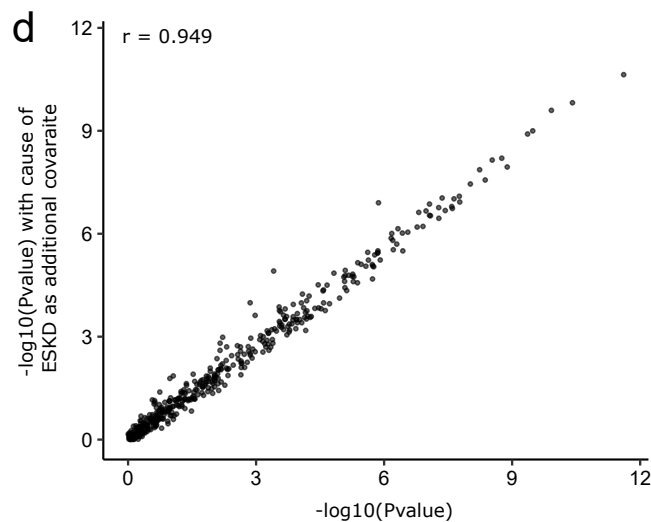

Supplement: supp [file elife-64827-supp-v1.zip › elife_poa_e64827_Figure_3_figure_supplement_3.pdf]

Figure 4 figure supplement 1

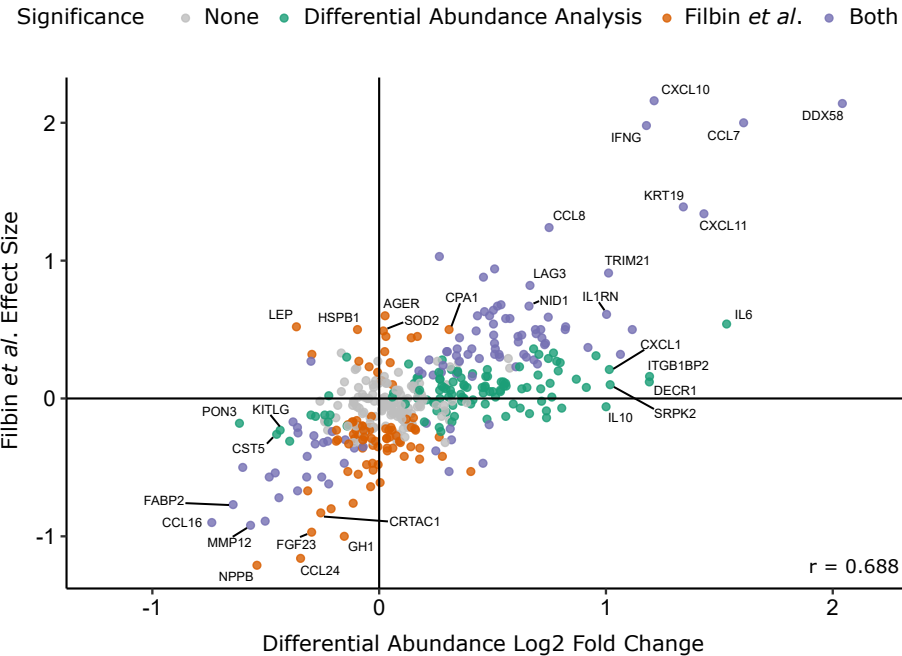

Supplement: supp [file elife-64827-supp-v1.zip › elife_poa_e64827_Figure_4_figure_supplement_1.pdf]

Figure 7 figure supplement 1

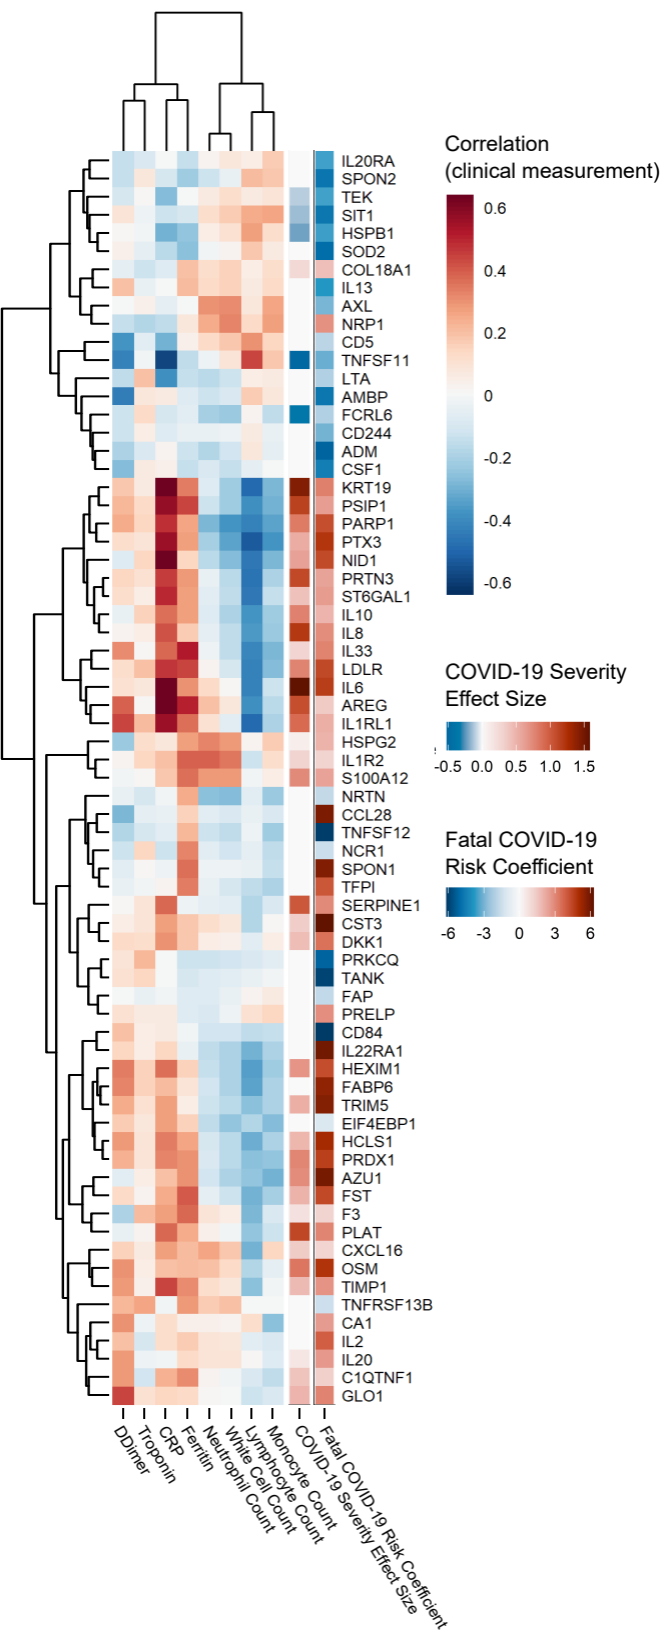

Supplement: supp [file elife-64827-supp-v1.zip › elife_poa_e64827_Figure_7_figure_supplement_1.pdf]

Figure 9 figure supplement 1

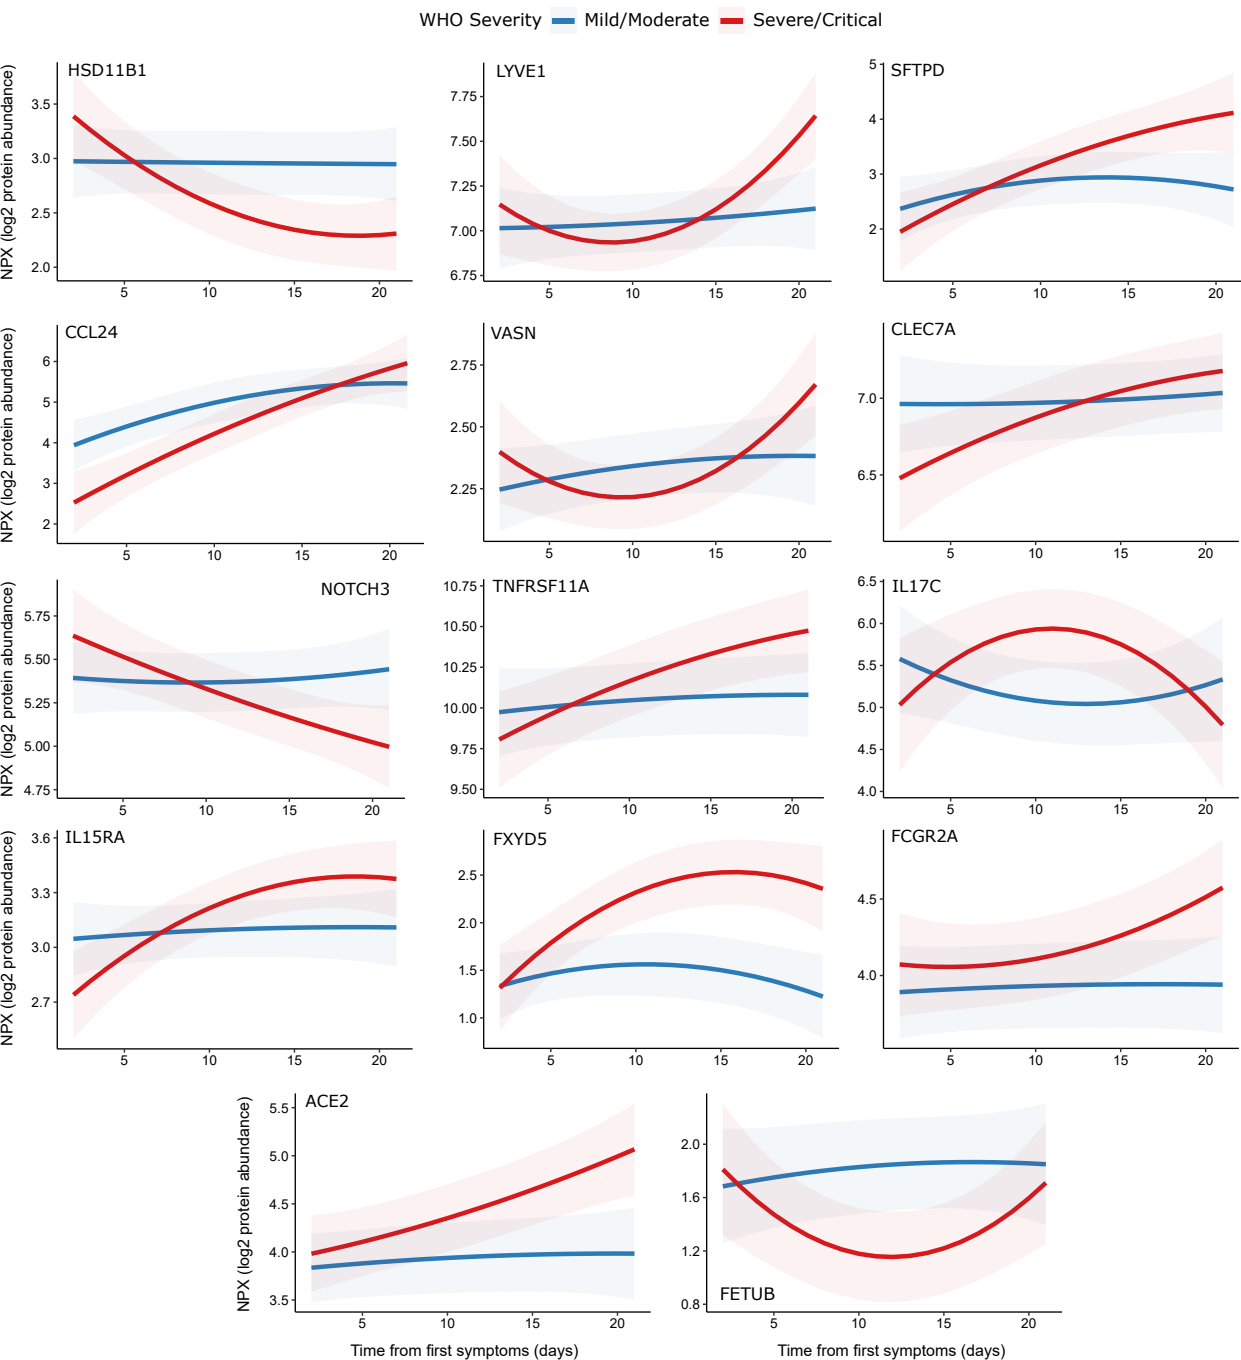

Supplement: supp [file elife-64827-supp-v1.zip › elife_poa_e64827_Figure_9_figure_supplement_1.pdf]

Figure 9 figure supplement 2

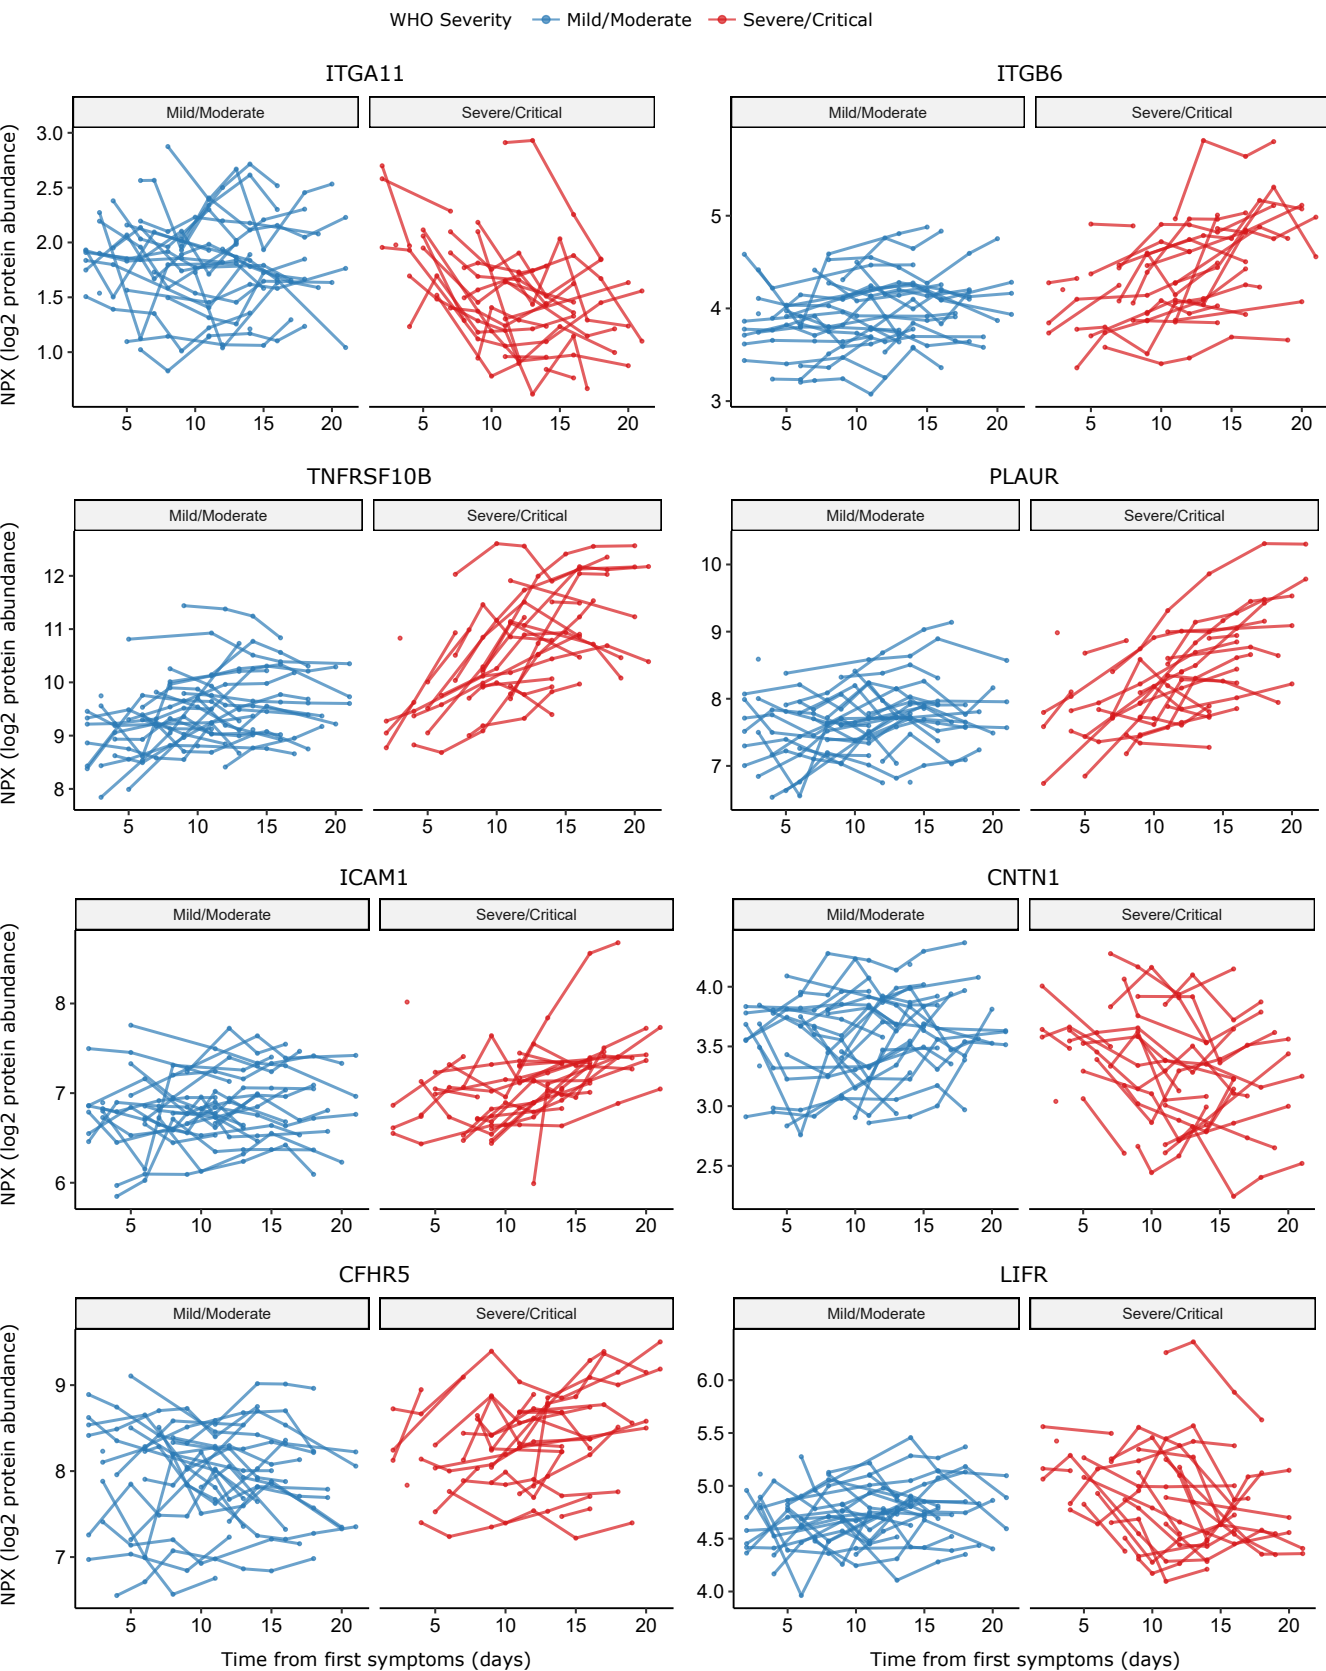

Supplement: supp [file elife-64827-supp-v1.zip › elife_poa_e64827_Figure_9_figure_supplement_2.pdf]
